# Supplementary material for: Why don’t key populations access HIV testing and counselling centres in Nepal? Findings based on national surveillance survey
Source: PubMed Central journal article supplement — BMJ Open. 2017 Dec 28;7(12):e017408. doi: 10.1136/bmjopen-2017-017408 (PMC5770839; doi:10.1136/bmjopen-2017-017408), 2017-12-28
Supplement: bmjopen-2017-017408.draft_revisions.pdf [file bmjopen-2017-017408.draft_revisions.pdf]

# BMJ Open

BMJ Open is committed to open peer review. As part of this commitment we make the peer review history of every article we publish publicly available.

When an article is published we post the peer reviewers' comments and the authors' responses online. We also post the versions of the paper that were used during peer review. These are the versions that the peer review comments apply to.

The versions of the paper that follow are the versions that were submitted during the peer review process. They are not the versions of record or the final published versions. They should not be cited or distributed as the published version of this manuscript.

BMJ Open is an open access journal and the full, final, typeset and author-corrected version of record of the manuscript is available on our site with no access controls, subscription charges or pay-per-view fees (<http://bmjopen.bmj.com>).

If you have any questions on BMJ Open's open peer review process please email [editorial.bmjopen@bmj.com](mailto:editorial.bmjopen@bmj.com)

# BMJ Open

## Why don't key populations access HIV counselling and testing centers in Nepal? Findings based on national surveillance survey

|                                 |                                                                                                                                                                                                                                                                                                                                                                                                                                                                                                       |
|---------------------------------|-------------------------------------------------------------------------------------------------------------------------------------------------------------------------------------------------------------------------------------------------------------------------------------------------------------------------------------------------------------------------------------------------------------------------------------------------------------------------------------------------------|
| Journal:                        | <i>BMJ Open</i>                                                                                                                                                                                                                                                                                                                                                                                                                                                                                       |
| Manuscript ID                   | bmjopen-2017-017408                                                                                                                                                                                                                                                                                                                                                                                                                                                                                   |
| Article Type:                   | Research                                                                                                                                                                                                                                                                                                                                                                                                                                                                                              |
| Date Submitted by the Author:   | 20-Apr-2017                                                                                                                                                                                                                                                                                                                                                                                                                                                                                           |
| Complete List of Authors:       | Shrestha, Rachana; Public Health and Environment Research Center Philip, Sairu; Government T.D Medical College, Alappuzha, Kerala, India, Community Medicine<br>Shewade, Hemant; International Union Against Tuberculosis and Lung Disease, South-East Asia Regional Office, Operational Research Rawal, Bir; National Centre for AIDS & STD Control, Ministry of Health Deuba, Keshab; Public Health and Environment Research Center, ; Karolinska Institutet , Department of Public Health Sciences |
| <b>Primary Subject Heading</b>: | Public health                                                                                                                                                                                                                                                                                                                                                                                                                                                                                         |
| Secondary Subject Heading:      | HIV/AIDS                                                                                                                                                                                                                                                                                                                                                                                                                                                                                              |
| Keywords:                       | key population, voluntary testing and counselling, MSM, transgender, FSW, SORT IT                                                                                                                                                                                                                                                                                                                                                                                                                     |
|                                 |                                                                                                                                                                                                                                                                                                                                                                                                                                                                                                       |

SCHOLARONE™  
Manuscripts

Only

1  
2  
3 1 **Why don't key populations access HIV counselling and testing centers in**  
4  
5 2 **Nepal? Findings based on national surveillance survey**  
6  
7

8  
9 3 **Authors:** Rachana Shrestha<sup>1\*</sup>, Sairu Philip<sup>2</sup>, Hemant Deepak Shewade<sup>3</sup>, Bir Rawal<sup>4</sup>, Keshab  
10 4 Deuba<sup>5</sup>  
11

12  
13  
14 5 **Affiliations:** <sup>1</sup>Public Health and Environment Research Center, Kathmandu Nepal,  
15  
16 <sup>2</sup>Government T.D Medical College, Alappuzha, Kerala, India, <sup>3</sup>International Union Against  
17 6 Tuberculosis and Lung Disease (The Union), South-East Asia Office, New Delhi, India,  
18 7  
19 <sup>4</sup>National Centre for AIDS and STD Control (NCASC), Ministry of Health, Kathmandu,  
20 8  
21 Nepal, <sup>5</sup> Department of Public Health Sciences, Karolinska Institutet, Stockholm, Sweden.  
22 9  
23  
24  
25  
26  
27  
28

29 11 \*Authors responsible for the correspondence: Rachana Shrestha, Public Health and  
30 12 Environment Research Center (PERC), Sanepa Lalitpur Nepal-44600  
31  
32  
33  
34 13 Tel: +977 9860999428; email: [rachana.shrestha@percnepal.org](mailto:rachana.shrestha@percnepal.org)  
35  
36

37 14 **Running title:** IBBS 2012Nepal: factors for non-utilization of HTC  
38  
39

40 15 **Word count:** Abstract -246; Main text - 2577; Tables – 2; Figure – 1; Web-only table – 1;  
41 16 Web-only box - 1  
42  
43  
44

45 17 **Keywords:** Key populations; voluntary testing and counselling; MSM; Transgender; FSW;  
46 18 SORT IT; Nepal  
47  
48  
49  
50

51 19  
52  
53  
54 20  
55  
56  
57 21  
58  
59  
60

1  
2  
3 22 **ABSTRACT**  
4  
5

6 23 **Objectives:** To assess the demographic, behavioural, structural and psychosocial factors  
7  
8 24 associated with non-utilization of HIV testing and counselling centers (HTC) by female sex  
9  
10 25 workers (FSWs) and men who have sex with men/ transgender (MSM/TGs).  
11

12  
13 26 **Methods:** This study involved a cross-sectional design. We used the national surveillance  
14  
15 27 survey data of 2012 which included 610 FSW and 400 MSM/TG recruited randomly from 22  
16  
17 28 and 3 districts of Nepal respectively. Adjusted prevalence ratio (aPR) and 0.95 CI using  
18  
19 29 modified Poisson regression was used to assess and infer the association between independent  
20  
21 30 and outcome (non-utilization of HTC in last year) variables.  
22  
23

24 31 **Results:** Non-utilization of HTC in last one year was 54% for FSW and 55% for MSM/TG.  
25  
26 32 The significant factors for non-utilization of HTC among FSW were: depression [aPR=1.4  
27  
28 33 (1.1-1.6)], injectable drug abuse (ever) [aPR=1.4 (1.1-1.8)], participation (ever) in HIV  
29  
30 34 awareness programmes [aPR=1.2 (1.0-1.4)], experience of forced sex in previous year  
31  
32 35 [aPR=1.1 (1.0-1.3)] and absence of dependents in the family [aPR=1.1 (1.0-1.3)]. Non-  
33  
34 36 utilisation of HTC among MSM/TG had significant association with age 16-19 years  
35  
36 37 [aPR=1.4 (1.1-1.7)], non-condom use [aPR=1.2 (1.0-1.4)], participation (ever) in HIV  
37  
38 38 awareness programs [aPR=1.6 (1.3-2.0)], physical assault in previous year [aPR=1.8(1.0-  
39  
40 39 3.1)], experience of forced sex in previous year [aPR=0.5 (0.3-0.9)]  
41  
42  
43

44 40 **Conclusion:** Although limited by cross-sectional design, we found many programmatically  
45  
46 41 relevant findings. Creative strategies should be envisaged for effective behavioural change  
47  
48 42 communication to improve access to HIV testing. Psychosocial and structural interventions  
49  
50 43 should be integrated with HIV prevention programmes to support key populations in  
51  
52 44 accessing HIV testing.  
53  
54

55  
56 45  
57  
58  
59  
60

1  
2  
3 46  
4  
5  
6 47  
7  
8  
9  
10 48  
11  
12  
13 49  
14  
15  
16 50  
17  
18  
19  
20 51  
21  
22  
23 52  
24  
25  
26 53  
27  
28  
29  
30 54  
31  
32  
33 55  
34  
35  
36 56  
37  
38  
39  
40 57  
41  
42  
43 58  
44  
45  
46 59  
47  
48  
49  
50 60  
51  
52  
53 61  
54  
55  
56  
57 62  
58  
59  
60

### **Summary – strengths and limitations of this study**

1. In the Nepal IBBS 2012 survey, psychosocial and structural factors were added.
2. This is the first study to explore the relation of psychosocial and structural factors with HTC non-utilization using IBBS 2012 data among FSW and MSM/TG in Nepal
3. Social desirability bias, recall bias due to the assessment of past exposures might have influenced the self-reported variables.
4. Cross-sectional design itself could result in difficulties in ascertaining temporality between various factors studied and non-utilization of HTC.

## 63 INTRODUCTION

64 Globally, at the end of 2015, an estimated 36.7 million people were living with HIV of  
65 which 47% did not know their HIV status and hence were deprived of antiretroviral therapy  
66 and care [1]. According to UNAIDS 90-90-90 target, by 2020, 90% of all individuals living  
67 with HIV should know their HIV status, 90% of all individuals with diagnosed HIV infection  
68 should receive sustained antiretroviral therapy, and 90% of all individuals receiving  
69 antiretroviral therapy should have viral suppression. By 2030 the AIDS epidemic will come to  
70 an end if these three targets are achieved [2].

71 The key population are those who have a high risk of acquiring or transmitting HIV.  
72 Global studies have shown that key populations are 13 to 22 times more likely to be infected  
73 with HIV than the general population [3]. Key population includes female sex workers (FSW)  
74 and men who have sex with men (MSM)/ transgender (TG) [4]. FSW and MSM/TG are 13-14  
75 times more likely to be infected with HIV than the general population [5].

76 World Health Organization (WHO) recommended integrated biological and  
77 behavioural surveillance survey (IBBS) to monitor HIV prevalence and risk behaviours  
78 among key populations. In 1999, IBBS was started by Government of Nepal as part of  
79 response plan against HIV/AIDS epidemic [6].

80 HIV testing and counselling (HTC) is the entry point for HIV care services in Nepal  
81 and are provided free of cost to all. National consolidated guidelines for preventing and  
82 treating HIV in Nepal had recommended various approaches for maximising HIV testing in  
83 both facility and community-based settings [4]. Different surveillance surveys conducted in  
84 Nepal found that that the non-utilization of HTC was around 50% in FSWs and MSM/TG.

85 There was a substantial decline in the proportion of FSW visiting HTC in 2016  
86 compared to 2012 as revealed by IBBS 2016 [7]. Among FSW, decreasing trend in HIV

1  
2  
3 87 prevalence was accompanied by an increasing trend in lack of comprehensive knowledge  
4  
5 88 regarding HIV and the downward trend of carrying a condom consistently [7,8]. The  
6  
7 89 UNAIDS target of 90% assessment of HIV status by 2020 might not be reached in Nepal  
8  
9  
10 90 unless factors associated with non-utilization of HTC are identified and addressed [2,9,10].  
11  
12 91 Psychosocial variables like distress/severe depression were included only in IBBS 2012  
13  
14 92 survey and were found to be over 50 percent of the key population (FSW and MSM/TG)  
15  
16 93 studied [8,11,12]. Psychosocial problems (depression, drug abuse and suicidality) increase the  
17  
18 94 likelihood of HIV-related risk behaviours among FSW and MSM/TG [13,14].  
19  
20

21 95 Therefore using the IBBS 2012 data, we aimed to determine the demographic,  
22  
23 96 behavioural, structural and psychosocial risk factors associated with non-utilization of HTC  
24  
25 97 services in last one year by FSW and MSM/TG in Nepal.  
26  
27  
28  
29  
30  
31  
32  
33  
34  
35 100  
36  
37  
38 101  
39  
40  
41 102  
42  
43  
44 103  
45  
46  
47 104  
48  
49  
50 105  
51  
52  
53 106  
54  
55  
56 107  
57  
58  
59  
60

1  
2  
3 108 **METHODS**  
4  
5

6 109 **Study design**  
7

8  
9 110 This study was a cross-sectional study involving secondary data of FSW and MSM/TG  
10  
11 111 collected from IBBS survey of 2012 in Nepal.  
12

13  
14 112 **Setting**  
15

16  
17 113 Nepal, with a population of 27 million, is a low-middle income, land-locked country  
18  
19 114 in South-East Asia [15]. It shares borders with China in the north and India to the south, east  
20  
21 115 and west. Nepal is divided into 75 districts and consists of Himalayan mountainous region in  
22  
23 116 the north and open terrain (*Terai* in local language) in the south. HTC service was first started  
24  
25 117 in Nepal in 1995 by the National programme for AIDS and sexually transmitted disease.  
26  
27 118 There are over 235 HTC service sites in Nepal as of July 2016.  
28

29  
30 119 *HTC in Nepal*  
31

32  
33 120 In Nepal, HTC is the entry point for HIV prevention services whose primary aim is to  
34  
35 121 identify people living with HIV and link them to treatment. It is voluntary and provided free  
36  
37 122 of cost. Health facilitators should maintain confidentiality and obtain informed consent during  
38  
39 123 pre and post-test counselling. According to national guidelines, key populations are expected  
40  
41 124 to visit HTC in every 6-12 months [6]. Besides that, community-based interventions are also  
42  
43 125 prioritised in which peer educators and outreach workers are mobilized in the community.  
44  
45 126 Peer educators, trained by outreach workers, are volunteers who convey crucial information  
46  
47 127 (proper condom use, HIV testing, etc.) to key populations in informal (cruising areas like bus  
48  
49 128 park or public park) and formal setting (drop-in centers) through HIV awareness programmes,  
50  
51 129 AIDS days, condom days, workshops/discussion on HIV, demonstration on condom use etc.  
52

53  
54  
55  
56 130 *IBBS 2012 Survey, Nepal*  
57  
58  
59  
60



1  
2  
3 131 National Centre for AIDS and STD control (NCASC), Nepal, conducted two separate  
4  
5 132 cross-sectional IBBS studies between September and November 2012 for FSW and MSM/TG  
6  
7 133 respectively. FSWs were defined as “*women aged 16 years and above reporting to have been*  
8  
9 134 *paid in cash or kind for sex with a male within the last six months.*” MSM/TG were defined as  
10  
11 135 “*those males aged 16 years or above who have had sexual relations (either oral or anal) with*  
12  
13 136 *another male in the 12 months preceding the survey.*”(7). A survey among FSW was  
14  
15 137 conducted in 22 *Terai* highway districts and for MSM/TG in three districts of Kathmandu  
16  
17 138 valley (figure 1).

### 21 139 **Study population and sampling**

22  
23  
24 140 The FSW were recruited using two-stage cluster sampling; stage 1 was the selection  
25  
26 141 of clusters and stage 2 was the random selection of an equal number of participants from each  
27  
28 142 selected cluster to ensure a self-weighted sample. A cluster was defined as having at least 30  
29  
30 143 sex workers in that area; those with fewer than 30 sex workers were merged with nearby  
31  
32 144 locations to form a cluster. To identify clusters, mapping was performed in collaboration with  
33  
34 145 service providers from local non-governmental organizations and community leaders to  
35  
36 146 determine areas where sex work is common, and noting the estimated number of possible  
37  
38 147 survey participants in each area. Seventy clusters out of a total of 401 clusters were selected  
39  
40 148 based on probability proportionate to size (PPS).

41  
42  
43  
44  
45 149 The MSM were recruited using respondent driven sampling (RDS) in consultation  
46  
47 150 with relevant stakeholder and motivators. To begin with, a total of eight MSM/TG were  
48  
49 151 recruited as seed. Those seeds were informed about survey protocols and procedure and were  
50  
51 152 encouraged to recruit other eligible individuals from their social networks randomly to  
52  
53 153 participate in survey. These initial seeds were provided three coupons to pass to their peers  
54  
55 154 who are eligible to participate in survey.

1  
2  
3 155 Detailed methodology and sampling strategies for IBBS surveys have been described  
4  
5 156 previously [8,11–13].  
6  
7

### 8 157 **Data variables for the present study**

9  
10  
11 158 IBBS survey included information on behavioural factors like uptake of interventions  
12  
13 159 for HIV, demographic, behavioural, structural and psychosocial variables [8,11,12]. Structural  
14  
15 160 factors included environmental/context conditions which were outside the control of the  
16  
17 161 individual, but which could influence his/her perceptions, behaviour and health [16].  
18  
19 162 Psychosocial variables (social support and depression) were assessed using social support  
20  
21 163 questionnaire short form (SSQS) and centre for epidemiological studies depression (CES-D)  
22  
23 164 scale respectively. Median score of <5 in SSQS scale was interpreted as ‘dissatisfied with  
24  
25 165 social support’. CES-D scale more than 16 and 22 were to classify distress and depression  
26  
27 166 respectively. We also assessed suicidality under psychosocial-related variables. Prevalence of  
28  
29 167 demographic, behavioural, structural and psychosocial factors have been summarized in **web-**  
30  
31 168 **only table 1.**  
32  
33  
34  
35

36 169 A self-reported visit to an HTC facility in past year by the FSW and MSM/TG was  
37  
38 170 chosen as the outcome variable. The independent variables (demographic, behavioural,  
39  
40 171 structural and psychosocial risk variables) selected in this study have been described in web-  
41  
42 172 only box 1.  
43  
44  
45

### 46 173 **Analysis and statistics**

47  
48  
49 174 Data analysis was done separately for FSW and MSM/TG. Data was analysed using  
50  
51 175 STATA (version 12.1 STATA Corp., College Station, TX, USA). Categorical variables were  
52  
53 176 described using frequency and proportions. The unadjusted and adjusted analysis was  
54  
55 177 performed separately for FSW and MSM/TG to assess the association of factors with the  
56  
57 178 outcome (not utilising HTC in last one year). All the RDS-related descriptive output were  
58  
59  
60

1  
2  
3 179 adjusted to represent the structure of the study population (MSM/TG) which was based on  
4  
5 180 information regarding who recruited whom, and the relative size of the respondent's network  
6  
7 181 using the Volz–Heckathorn estimator (RDS II) (20). Adjustment for clustering was not  
8  
9  
10 182 required in FSW data as it was a self-weighted sample.

11  
12 183 Variables with a p-value of <0.2 in the unadjusted analysis were included in the  
13  
14 184 regression model (enter method) after assessment for multicollinearity using variance  
15  
16 185 inflation factor. The variables included for FSW were age group, educational status, condom  
17  
18 186 use in last sex, 'ever' participated in HIV program, distress/depression and suicidal thought  
19  
20  
21 187 'ever'. For MSM/TG, the variables included were educational status, condom use in last sex,  
22  
23 188 'ever' participated in HIV program, distress/depression and suicidal thought 'ever'. Adjusted  
24  
25 189 prevalence ratios (aPR) with 95% confidence intervals (CI) were calculated by fitting Poisson  
26  
27 190 regression with robust variance estimates.

### 29 191 **Ethical Considerations**

30  
31  
32 192 Ethics approval for IBBS survey 2012 was given by the Nepal Health Research  
33  
34 193 Council (NHRC), Kathmandu, Nepal. Ethics approval for the analysis of secondary data for  
35  
36 194 this study was taken in 2016 from Ethics Advisory Group, the International Union Against  
37  
38 195 Tuberculosis and Lung Disease (The Union), Paris, France. Administrative approval was also  
39  
40 196 received from NCASC and Public Health and Environment Research Center (PERC) Nepal.  
41  
42  
43 197 Waiver of informed consent was sought and approved by the ethics committee as this study  
44  
45 198 involved analysis of secondary data.

46  
47  
48 199

49  
50  
51 200

52  
53  
54  
55 201

1  
2  
3 202 **RESULTS**  
4  
5

6 203 IBBS survey 2012 included 610 FSW and 400 MSM/TG with HIV prevalence of 1  
7  
8 204 and 3.8 percent respectively. The proportion of FSW and MSM/TG in the age group 16 to 19  
9  
10 205 was 13.9% and 17.2% respectively. Non-utilization of HTC in last one year was 54% for  
11  
12 206 FSW and 55% for MSM/TG. Other characteristics of the study population are presented in  
13  
14  
15 207 web-only table 1. The factors associated with non-utilisation of HTC in last one year among  
16  
17 208 FSW and MSM/TG are summarised in **Table 1** and **Table 2** respectively.  
18  
19

20 209 The risk factors for non-utilisation of HTC in last one year among FSW were: injection of  
21  
22 210 drugs (ever), participation (ever) in HIV awareness programmes, an episode of forced sex in  
23  
24 211 last one year, the absence of dependents in the family and distress/depression.  
25  
26

27  
28 212 The risk factors for non-utilisation of HTC in last one year among FSW were: young age (16-  
29  
30 213 19 years), no condom use in last sex, participation (ever) in HIV awareness programs,  
31  
32 214 physical assault in last year and not having forced sex in last year.  
33  
34

35 215  
36

37  
38 216  
39

40  
41 217  
42

43  
44 218  
45

46  
47 219  
48

49  
50 220  
51

52  
53 221  
54

55  
56 222  
57  
58  
59  
60

**Table 1.** Factors associated with non-utilization of HIV Testing and Counselling (HTC) centers among female sex workers surveyed under Integrated Biological and Behavioural Surveillance Survey, 2012, Nepal

| Variables                                   |                        | Total<br>N | HTC not<br>Utilized <sup>@</sup><br>n(%) <sup>^</sup> | Adj PR**      |
|---------------------------------------------|------------------------|------------|-------------------------------------------------------|---------------|
| <b>Total</b>                                |                        | <b>610</b> | <b>330(54)</b>                                        |               |
| <b>Demographic</b>                          |                        |            |                                                       |               |
| Age in years                                | 16-19                  | 85         | 51 (60)                                               | 1.0 (0.8-1.2) |
|                                             | 20-24                  | 130        | 73(56)                                                | 1.0 (0.7-1.2) |
|                                             | >25                    | 395        | 206 (52)                                              | Ref.          |
| Educational Status                          | Illiterate             | 196        | 98 (50)                                               | 0.9(0.7-1.0)  |
|                                             | Literate               | 414        | 232 (56)                                              | Ref.          |
| Marital Status                              | Married                | 360        | 197 (55)                                              | Ref           |
|                                             | Unmarried              | 102        | 60 (59)                                               | -             |
|                                             | Separated/<br>Divorced | 148        | 73 (49)                                               | -             |
| <b>Behavioural</b>                          |                        |            |                                                       |               |
| Condom use in last sex                      | Yes                    | 461        | 256(56)                                               | Ref.          |
|                                             | No                     | 149        | 74(32)                                                | 0.9(0.7-1.0)  |
| Ever inject drugs                           | Yes                    | 40         | 29(73)                                                | 1.4(1.1-1.8)* |
|                                             | No                     | 570        | 301(53)                                               | Ref.          |
| <b>Structural</b>                           |                        |            |                                                       |               |
| Ever participated in HIV awareness programs | Yes                    | 169        | 102(52)                                               | 1.2(1.0-1.4)* |
|                                             | No                     | 441        | 228(60)                                               | Ref.          |
| Physical assault in last year               | Yes                    | 81         | 36 (44)                                               | 0.8 (0.6-1.0) |
|                                             | No                     | 529        | 294 (56)                                              | Ref.          |
| Housing Instability                         | Homeless               | 15         | 6 (40)                                                | -             |
|                                             | Own home               | 320        | 169 (53)                                              | -             |
|                                             | Rented                 | 275        | 155 (56)                                              |               |
| Forced sex in last year                     | Yes                    | 125        | 84 (67)                                               | 1.1(1.0-1.3)* |
|                                             | No                     | 485        | 246 (51)                                              | Ref.          |
| Having dependents                           | Yes                    | 341        | 169 (50)                                              | Ref.          |
|                                             | No                     | 269        | 161 (60)                                              | 1.1(1.0-1.3)* |
| Police detention in last 6 months           | Yes                    | 81         | 37 (46)                                               | 0.8(0.6-1.0)  |
|                                             | No                     | 529        | 293 (55)                                              | Ref.          |
| Client refusal to pay in last year          | Yes                    | 153        | 89 (58)                                               | -             |
|                                             | No                     | 457        | 241 (53)                                              | -             |
| <b>Psychosocial</b>                         |                        |            |                                                       |               |
| Stigma towards HIV                          | Yes                    | 295        | 168(57)                                               | 1.0(0.9-1.2)  |
|                                             | No                     | 315        | 162(51)                                               | Ref.          |
| Suicidal thoughts (Ever)                    | Yes                    | 210        | 117(56)                                               | -             |
|                                             | No                     | 399        | 212 (53)                                              | -             |
| Depression <sup>#</sup>                     | Euthymic               | 342        | 159 (46)                                              | Ref.          |
|                                             | Distressed             | 156        | 100 (64)                                              | 1.4(1.1-1.5)* |
|                                             | Depressed              | 112        | 71 (63)                                               | 1.4(1.1-1.6)* |
| SSQS <sup>^</sup>                           | Satisfied              | 530        | 289(55)                                               | -             |
|                                             | Dissatisfied           | 80         | 41(51)                                                | -             |

<sup>@</sup>Not utilised in last one year; \* p<0.05; \*\*Adjusted prevalence ratio using Poisson regression with robust variance estimates (enter method); factors with Unadjusted PR with p<0.2 included in the model and collinearity checked; <sup>#</sup>Depression measured using a CES-D scale; <sup>^</sup>SSQS- The Social Support Questionnaire Score.

229 **Table 2.** Factors associated with non-utilization of HIV Testing and Counselling (HTC)  
 230 centers among Men having Sex with Men/Transgender surveyed under Integrated Biological  
 231 and Behavioural Surveillance Survey, 2012, Nepal

| Variables                                   |              | N          | HTC not Utilized <sup>@</sup><br>n(%) | Adj PR**      |
|---------------------------------------------|--------------|------------|---------------------------------------|---------------|
| <b>Total</b>                                |              | <b>400</b> | <b>221(55)</b>                        |               |
| <b>Demographic factors</b>                  |              |            |                                       |               |
| Age in years                                | 16-19        | 69         | 54(78)                                | 1.4(1.1-1.7)* |
|                                             | 20-24        | 129        | 73(57)                                | 1.1(0.9-1.4)  |
|                                             | >25          | 202        | 94(47)                                | Ref           |
| Educational Status                          | Illiterate   | 13         | 7(54)                                 | -             |
|                                             | Literate     | 387        | 214(55)                               | -             |
| Marital Status                              | Unmarried    | 289        | 163(56)                               | -             |
|                                             | Married      | 111        | 58(52)                                | -             |
| <b>Behavioural</b>                          |              |            |                                       |               |
| Condom use in last sex                      | Yes          | 339        | 177(72)                               | Ref.          |
|                                             | No           | 61         | 44(52)                                | 1.2(1.0-1.4)* |
| Drinking Alcohol                            | Yes          | 323        | 186(58)                               | 1.2(0.9-1.5)  |
|                                             | No           | 77         | 35(45)                                | Ref.          |
| <b>Structural</b>                           |              |            |                                       |               |
| Ever Participated in HIV awareness programs | Yes          | 185        | 62(34)                                | 1.6(1.3-2.0)* |
|                                             | No           | 215        | 159(74)                               | Ref.          |
| Physical assault in last year               | Yes          | 57         | 10(18)                                | 1.8(1.0-3.1)* |
|                                             | No           | 343        | 211(62)                               | Ref.          |
| Housing instability                         | Homeless     | 8          | 4(50)                                 | -             |
|                                             | Own home     | 75         | 42(56)                                | -             |
|                                             | Rented       | 317        | 175(55)                               | -             |
| Forced sex in last year                     | Yes          | 52         | 10(19)                                | 0.5(0.3-0.9)* |
|                                             | No           | 348        | 211(61)                               | Ref.          |
| Discrimination in Job                       | Yes          | 79         | 17(22)                                | Ref.          |
|                                             | No           | 321        | 204(64)                               | 1.3(0.8-2.2)  |
| <b>Psychosocial factors</b>                 |              |            |                                       |               |
| Stigma towards HIV                          | Yes          | 253        | 138(54)                               | -             |
|                                             | No           | 147        | 83(56)                                | -             |
| Suicidal thought Ever                       | Yes          | 107        | 33(31)                                | 0.7(0.5-1.0)  |
|                                             | No           | 293        | 188(64)                               | Ref.          |
| Depression <sup>#</sup>                     | Euthymic     | 220        | 121(59)                               | -             |
|                                             | Distressed   | 83         | 49(53)                                | -             |
|                                             | Depressed    | 97         | 51(55)                                | -             |
| SSQS <sup>^</sup>                           | Satisfied    | 390        | 216(55)                               | -             |
|                                             | Dissatisfied | 10         | 5(50)                                 | -             |

232 <sup>@</sup> Not utilised in last one year; \* p<0.05; \*\*Adjusted prevalence ratio using Poisson regression with robust  
 233 variance estimates (enter method); factors with Unadjusted PR with p<0.2 included in model and collinearity  
 234 checked; <sup>#</sup>Depression measured using a CES-D scale; <sup>^</sup>SSQS- The Social Support Questionnaire Score

235

236

237

1  
2  
3 238 **DISCUSSION**  
4  
5

6 239 In IBBS 2012 survey, in addition to individual level variables, psychosocial and  
7  
8 240 structural factors were added. To the best of our knowledge, this study is the first to explore  
9  
10 241 the relation of psychosocial and structural factors with HTC non-utilization among FSW and  
11  
12 242 MSM/TG in Nepal. This study found different risk factors for non-utilization of HTC in last  
13  
14 243 one year among FSW and MSM/TG. They were demographic: late adolescents (MSM/TG);  
15  
16 244 behavioural: injectable drug abuse (FSW) and no condom use at last sex (MSM/TG);  
17  
18 245 structural: participation in HIV awareness programmes (FSW and MSM/TG), forced sex in  
19  
20 246 last one year (risk factor among FSW and protective factor among MSM/TG), absence of  
21  
22 247 dependent members (FSW), physical assault in last year (MSM/TG); and psychosocial: being  
23  
24 248 distressed/depressed (FSW).  
25  
26  
27

28 249 Psychosocial factors play an important role in health services utilisation [14]. FSWs  
29  
30 250 who had distress or depression (one in two FSWs) had a higher prevalence of non-utilization  
31  
32 251 of HTC. This could have resulted in disempowerment and thereby resulting in not accessing  
33  
34 252 HTC services when needed [11,12]. Studies have found that FSWs used alcohol and drugs, to  
35  
36 253 reduce stress and to help them cope with their work [17,18]. Gambian study showed that  
37  
38 254 women who experienced forced sex reported severe depression [19].  
39  
40  
41

42 255 Old MSM/TGs were found to use condoms more when compared to younger ones.  
43  
44 256 The median age of first sexual intercourse being 16 years and the fact that the old adolescents  
45  
46 257 (16-19 years) MSM/TGs did not significantly access HTC is a cause of concern [8,11]. The  
47  
48 258 risk-taking behaviour in adolescence can compound their risk in acquiring HIV, and hence  
49  
50 259 this group need to be targeted.  
51  
52

53 260 Not visiting an HTC facility was also associated with not using a condom during last  
54  
55 261 sex among MSM/TGs. Injectable drug abuse and not having dependent members among  
56  
57  
58  
59  
60

1  
2  
3 262 FSWs were associated with non-utilization of HTC. These high-risk groups deserve urgent  
4  
5 263 attention.  
6

7 264 Some factors affecting utilisation of HTC by MSM/TGs were different from that of  
8  
9 265 FSWs. In events like forced sex in last year among FSW, it reduced the utilisation of HTCs  
10  
11 266 among FSWs. Among MSM/TGs, the experience of forced sex led to utilisation of HTC.  
12  
13 267 IBBS survey revealed that the perception of HIV risk by key population was related to  
14  
15 268 condom use, which was higher among MSM/TGs when compared to FSWs. Three-fourths of  
16  
17 269 MSM/TG believed they were at little or no risk of HIV if condoms were used [8]. This could  
18  
19 270 explain the different effects forced sex experience had on HTC utilization among FSW and  
20  
21 271 MSM/TGs.  
22

23  
24  
25 272 Participation in HIV awareness programmes by key population showed decreasing  
26  
27 273 trend over the years [8,11]. Participation as a risk factor for non-utilisation of HTC for both  
28  
29 274 FSW and MSM/TG seemed intriguing. In Nepal, the major component of a prevention  
30  
31 275 programme is awareness raising activities. Educators taught key population on modes of HIV  
32  
33 276 transmission, consistent and correct use of condoms and STI prevention. It is seen that  
34  
35 277 interaction with peer educators was higher in MSM/TGs compared to FSWs [8,11]. The  
36  
37 278 activities which enlisted more participation were short duration events like condom/AIDS day  
38  
39 279 celebration compared to effective training methods like demonstration classes, workshops,  
40  
41 280 etc. that provide a platform for deeper understanding of HIV risks (**web-only table 1**). HIV  
42  
43 281 prevention programme seemed to revolve around the promotion of condom with peer  
44  
45 282 educators and popular HIV/AIDS messages focusing on condom-related messages and  
46  
47 283 activities. Hence participation in awareness classes resulted in high condom use and the fact  
48  
49 284 that two-thirds of MSM/TGs and FSWs were tested for HIV at some point in time could have  
50  
51 285 narrowed their risk perception to a low level as well as decreased their felt need to access  
52  
53 286 HTC. The other explanation for this could be the cross-sectional nature of data. Those who  
54  
55  
56  
57  
58  
59  
60



1  
2  
3 287 had visited an HTC in last one year might not have felt the need for attending HIV awareness  
4  
5 288 programmes.  
6  
7

8 289 Despite being limited by a cross-sectional design, the findings of this study bring out  
9  
10 290 three major policy implications. First, psychosocial support needs to be an integral part of  
11  
12 291 programmes for FSW and MSM/TG at all levels. HTC should be developed as an  
13  
14 292 empowerment centre lending psychosocial and treatment support rather than being a centre  
15  
16 293 for testing alone. Second, HIV prevention programmes in Nepal need to go beyond condom  
17  
18 294 promotion. Creative strategies should be envisaged for effective behavioural change  
19  
20 295 communication. Third, specific prevention programmes should be rolled out to reach key  
21  
22 296 population at specific risks considering contextual/demographic differentials between key  
23  
24 297 populations, say for example young MSM/TGs.  
25  
26  
27

28  
29 298 Our study adhered to STROBE guidelines for conduct and report of the study [20].  
30  
31 299 The findings are generalizable to FSWs and MSM/TGs of Nepal as standard sampling  
32  
33 300 strategy was followed for the IBBS survey [8,11–13]. The present study had inherent  
34  
35 301 limitations of analysing secondary data. Certain pertinent variables (for example; injectable  
36  
37 302 drug abuse in last 12 months among MSM/TG) could not be included in the analysis due to  
38  
39 303 missing data. The limitations of the original survey like social desirability bias, recall bias  
40  
41 304 due to the assessment of past exposures might have influenced the self-reported variables. The  
42  
43 305 cross-sectional design itself could result in difficulties in ascertaining temporality between  
44  
45 306 various factors studied and non-utilization of HTC.  
46  
47  
48

49  
50 307

## 51 52 53 308 **CONCLUSION**

54  
55  
56 309 To conclude, the psychosocial and structural factors are influencing utilisation of HIV  
57  
58 310 testing and counselling centers among FSW and MSM/TG in Nepal. In addition to focussing  
59  
60

1  
2  
3 311 on these risk factors, there is a need to empower HTC's to lend psychosocial support to the key  
4  
5 312 population. Creative behaviour change and communication strategies should be ensured to  
6  
7 313 overcome the limitations of current awareness programmes for key populations.  
8  
9

10 314

### 11 315 **Acknowledgements**

12  
13  
14 316 This research was conducted through the Structured Operational Research and Training  
15  
16 317 Initiative (SORT IT), a global partnership led by the Special Programme for Research and  
17  
18 318 Training in Tropical Diseases at the World Health Organization (WHO/TDR). The training  
19  
20 319 programme, funded by the Department for International Development (DFID), UK, did not  
21  
22 320 fund the research per say. The funders of the training programme had no role in study design,  
23  
24 321 data collection and analysis, decision to publish, or preparation of the manuscript. The model  
25  
26 322 is based on a course developed jointly by the International Union Against Tuberculosis and  
27  
28 323 Lung Disease (The Union) and Médecins sans Frontières (MSF/Doctors Without Borders).  
29  
30 324 The specific SORT IT programme which resulted in this publication was jointly developed  
31  
32 325 and implemented by: The Union South-East Asia Office, New Delhi, India; the Centre for  
33  
34 326 Operational Research, The Union, Paris, France; The Union, Mandalay, Myanmar; the  
35  
36 327 Operational Research Unit (LUXOR), MSF Brussels Operational Center, Luxembourg;  
37  
38 328 Department of Preventive and Social Medicine, Jawaharlal Institute of Postgraduate Medical  
39  
40 329 Education and Research, Puducherry, India; Department of Community Medicine,  
41  
42 330 Government T.D Medical College, Alappuzha, India; College of Life and Environmental  
43  
44 331 Sciences, Exeter University, UK; Velammal Medical College Hospital & Research Institute,  
45  
46 332 Madurai, India; and Institute of Medicine, University of Chester, UK.  
47  
48  
49  
50

51 333

52  
53  
54 334 **Funding:** This research received no specific grant from any funding agency in the public,  
55  
56 335 commercial or not-for-profit sectors.  
57  
58  
59  
60

1  
2  
3 336  
4

5 337 **Competing interest:** None  
6

7 338  
8

9 339 **Contributors:** RS, SP, HDS and KD were involved in conception and design of the study; all  
10  
11 340 authors were involved in analysis and interpretation of data; RS prepared the first draft, and  
12  
13 341 all authors were involved in critically reviewing the draft and approving the final draft for  
14  
15 342 submission.  
16

17  
18 343 **Data availability statement:** Data is available with the corresponding author and will be  
19  
20 344 provided on request.  
21

22 345 **Provenance and peer review:** Not commissioned; externally peer reviewed.  
23  
24  
25 346  
26  
27 347  
28  
29 348  
30

31  
32 349 **REFERENCES**  
33

34 350 1 World Health Organization (WHO). HIV/AIDS. Fact sheet. Updated November 2016.  
35  
36 351 2015.<http://www.who.int/mediacentre/factsheets/fs360/en/> (accessed 7 Apr2017).  
37

38  
39 352 2 UNAIDS. 90-90-90: An ambitious treatment target to help end the AIDS epidemic.  
40  
41 353 Geneva, Switzerland: 2014.  
42

43  
44 354 3 World Health Organization. Global update on HIV treatment 2013: Results, impact and  
45  
46 355 opportunities.  
47

48  
49 356 2013.[http://www.who.int/hiv/data/global\\_treatment\\_report\\_presentation\\_2013.pdf](http://www.who.int/hiv/data/global_treatment_report_presentation_2013.pdf)  
50  
51 357 (accessed 7 Apr2017).  
52

53  
54 358 4 National Centre for AIDS and STD Control (NCASC). Review of the National HIV  
55  
56 359 Surveillance System: Strengthening the HIV Second Generation Surveillance in Nepal.  
57  
58  
59  
60

- 1  
2  
3 360 2007.<http://library.nhrc.org.np:8080/nhrc/handle/123456789/176> (accessed 7  
4  
5 361 Apr2017).  
6  
7  
8 362 5 World Health Organization. Global update on HIV treatment 2013: Results, impact and  
9  
10 363 opportunities. 2013.  
11  
12  
13 364 6 National Centre for AIDS and STD Control (NCASC). National Consolidated  
14  
15 365 Guidelines for Treating and Preventing HIV in Nepal. Kathmandu, Nepal: 2014.  
16  
17  
18 366 7 National Centre for AIDS and STD Control (NCASC); Integrated Biological and  
19  
20 367 Behavioral Surveillance (IBBS) Survey among Female Sex Workers in 22 Terai  
21  
22 368 Highway Districts of Nepal - Round V. Kathmandu, Nepal: 2016.  
23  
24  
25  
26 369 8 National Centre for AIDS and STD Control (NCASC); Integrated Biological and  
27  
28 370 Behavioral Surveillance (IBBS) Survey among Men who have sex with men (MSM)  
29  
30 371 and Transgender (TG) people in Kathmandu Valley, Nepal. Kathmandu, Nepal: 2012.  
31  
32  
33 372 9 World Health Organization. Preventing HIV/AIDS in young people: A systematic  
34  
35 373 review of the evidence from developing countries. Geneva, Switzerland: 2006.  
36  
37  
38 374 10 Lightfoot M. HIV prevention for adolescents: where do we go from here? *The*  
39  
40 375 *American psychologist* 2012;**67**:661–71. doi:10.1037/a0029831  
41  
42  
43  
44 376 11 National Centre for AIDS and STD Control (NCASC); Integrated Biological and  
45  
46 377 Behavioral Surveillance Survey (IBBS) among Male Injecting Drug Users (IDUs) in  
47  
48 378 Western to FarWestern Terai of Nepal. Kathmandu: 2012.  
49  
50  
51 379 12 National Centre for AIDS and STD Control (NCASC). Integrated Biological and  
52  
53 380 Behavioral Surveillance (IBBS) Survey among Female Sex Workers in 22 Terai  
54  
55 381 Highway Districts of Nepal. Kathmandu: 2012.  
56  
57  
58  
59  
60

- 1  
2  
3 382 13 Deuba K, Anderson S, Ekstrom AM, *et al.* Micro-level social and structural factors act  
4  
5 383 synergistically to increase HIV risk among Nepalese female sex workers. *International*  
6  
7 384 *Journal of Infectious Diseases* 2016;**49**:100–6. doi:10.1016/j.ijid.2016.06.007  
8  
9  
10 385 14 Deuba K, Ekström AM, Shrestha R, *et al.* Psychosocial Health Problems Associated  
11  
12 386 with Increased HIV Risk Behavior among Men Who Have Sex with Men in Nepal: A  
13  
14 387 Cross-Sectional Survey. *PLoS ONE* 2013;**8**. doi:10.1371/journal.pone.0058099  
15  
16  
17 388 15 The Organisation for Economic Co-operation and Development (OECD). Development  
18  
19 389 Assistance Committee (DAC) list of ODA Recipients 2014.  
20  
21 390 2014.[https://www.oecd.org/dac/stats/documentupload/DAC List of ODA Recipients](https://www.oecd.org/dac/stats/documentupload/DAC%20List%20of%20ODA%20Recipients%202014%20final.pdf)  
22  
23 391 2014 final.pdf (accessed 7 Apr2017).  
24  
25  
26  
27 392 16 UNAIDS. Combination HIV Prevention: tailoring and coordinating biomedical,  
28  
29 393 behavioural and structural strategies to reduce new HIV infections.  
30  
31 394 2010.[http://www.unaids.org/en/resources/documents/2010/20101006\\_JC2007\\_Combin](http://www.unaids.org/en/resources/documents/2010/20101006_JC2007_Combination_Prevention_paper)  
32  
33 395 [ation\\_Prevention\\_paper](http://www.unaids.org/en/resources/documents/2010/20101006_JC2007_Combination_Prevention_paper) (accessed 7 Apr2017).  
34  
35  
36  
37 396 17 Go VF, Srikrishnan AK, Parker CB, *et al.* High prevalence of forced sex among non-  
38  
39 397 brothel based, wine shop centered sex workers in Chennai, India. *AIDS and behavior*  
40  
41 398 2011;**15**:163–71. doi:10.1007/s10461-010-9758-0  
42  
43  
44 399 18 Stall R, Mills TC, Williamson J, *et al.* Association of Co-Occurring Psychosocial  
45  
46 400 Health Problems and Increased Vulnerability to HIV/AIDS among Urban Men Who  
47  
48 401 Have Sex with Men. *American Journal of Public Health* 2003;**93**:939–42.  
49  
50 402 doi:10.2105/AJPH.93.6.939  
51  
52  
53  
54 403 19 Sherwood JA, Grosso A, Decker MR, *et al.* Sexual violence against female sex workers  
55  
56 404 in The Gambia: a cross-sectional examination of the associations between victimization  
57  
58  
59  
60

1  
2  
3 405 and reproductive, sexual and mental health. *BMC public health* 2015;**15**:270.

4  
5 406 doi:10.1186/s12889-015-1583-y

6  
7  
8 407 20 von Elm E, Altman DG, Egger M, *et al.* The Strengthening the Reporting of  
9  
10 408 Observational Studies in Epidemiology (STROBE) Statement: Guidelines for reporting  
11  
12 409 observational studies. *The Lancet* 2007;**370**:1453–7. doi:10.1016/j.ijisu.2014.07.013

13  
14  
15 410

16  
17  
18 411 **Licence statement**

19  
20 412 The Corresponding Author has the right to grant on behalf of all authors and does grant on  
21  
22 413 behalf of all authors, an exclusive licence (or non-exclusive for government employees) on a  
23  
24 414 worldwide basis to the BMJ and co-owners or contracting owning societies (where published  
25  
26 415 by the BMJ on their behalf), and its Licensees to permit this article (if accepted) to be  
27  
28 416 published in Sexually Transmitted Infections and any other BMJ products and to exploit all  
29  
30 417 subsidiary rights, as set out in our licence.

31  
32  
33 418

34  
35  
36 419

37  
38 420 **Figure Legend**

39  
40 421 **Figure 1.** Study districts included in Integrated Biological and Behavioural Surveillance  
41  
42 422 (IBBS) survey 2012, Nepal.

43  
44  
45 423

46  
47 424 Figure footnote

48  
49  
50 425 \*MSM/TG – Men who have sex with men/transgender, PWID – people who inject drugs, FSW  
51  
52 426 – female sex workers

1  
2  
3 427  
4  
5 428  
6  
7 429  
8  
9  
10  
11  
12  
13  
14  
15  
16  
17  
18  
19  
20  
21  
22  
23  
24  
25  
26  
27  
28  
29  
30  
31  
32  
33  
34  
35  
36  
37  
38  
39  
40  
41  
42  
43  
44  
45  
46  
47  
48  
49  
50  
51  
52  
53  
54  
55  
56  
57  
58  
59  
60

For peer review only

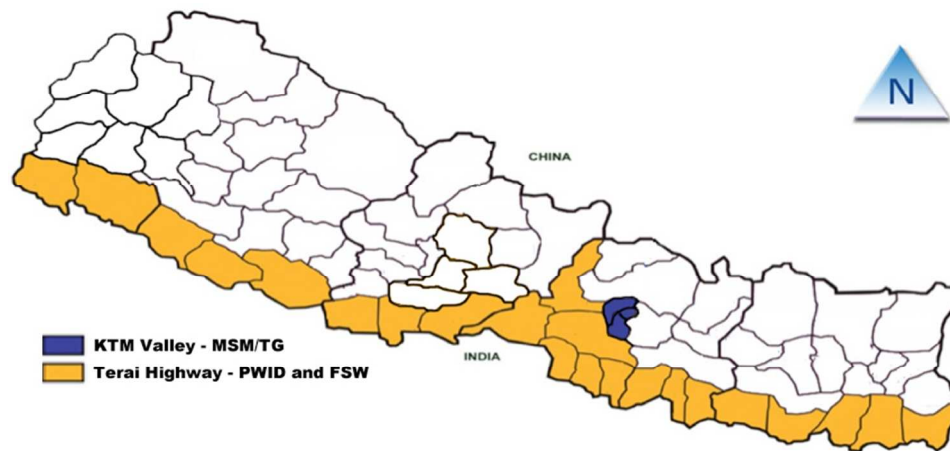

Figure 1. Study districts included in Integrated Biological and Behavioural Surveillance (IBBS) survey 2012, Nepal.

Figure footnote

\*MSM/TG – Men who have sex with men/transgender, PWID – people who inject drugs, FSW – female sex workers

review only



1  
2  
3 Web-only box 1. Independent variables used in this study from the IBBS 2012 survey among  
4 FSW and MSM/TG to determine Uptake of HTC, Nepal.  
5  
6  
7

8 **Demographic Factors:** Age, Educational Status, Marital Status  
9

10 **Behavioural Factors:** Condom Use last sex, Ever inject drug, Drinking alcohol  
11

12 **Structural Factors:**  
13

- 14 ✓ Among FSW: Housing Instability, Experienced forced sex in last year, Ever  
15 participated in HIV programs, Having dependent, Police detention in last 6 months,  
16 Physical assault last year, Client refusal to pay after sex in last year  
17
- 18 ✓ Among MSM/TG: Housing Instability, Ever participated in HIV programs, Physical  
19 assault last year, Experienced forced sex in last year, Discrimination in Job  
20  
21  
22  
23  
24

25 **Psychosocial Factors:**  
26

- 27 ✓ Among FSW:, Stigma towards HIV, Suicidal thoughts Ever, Depression, The Social  
28 Support Questionnaire Score (SSQS)  
29
- 30 ✓ Among MSM/TG:, Stigma towards HIV, Suicidal thoughts Ever, Depression, The  
31 Social Support Questionnaire Score (SSQS)  
32  
33  
34  
35  
36  
37  
38  
39  
40  
41  
42  
43  
44  
45  
46  
47  
48  
49  
50  
51  
52  
53  
54  
55  
56  
57  
58  
59  
60

**Web-only table 1.** Prevalence of demographic, psychosocial and structural factors among FSW and MSM/TG, IBBS 2012 Nepal.

| <b>Factors</b>                        | <b>FSW<br/>N (%)</b> | <b>MSM/TG<br/>N (%)</b> |
|---------------------------------------|----------------------|-------------------------|
| <b>Total</b>                          | 610 (100)            | 400 (100)               |
| <b>Demographic</b>                    |                      |                         |
| Age in years                          |                      |                         |
| 16-19                                 | 85 (14)              | 69 (17)                 |
| 20-24                                 | 130 (21)             | 129 (32)                |
| ≥25                                   | 395(65)              | 202 (51)                |
| Illiterate                            | 196(32)              | 13(3)                   |
| Married                               | 360(59)              | 111(28)                 |
| <b>Behavioural</b>                    |                      |                         |
| Use of condom with most recent client | 461(75)              | 339(85)                 |
| Consistent condom use                 | 236(59)              | 344(86)                 |
| <b>Structural</b>                     |                      |                         |
| Having dependents in family           | 341(56)              | 192(79)                 |
| Own home                              | 311(51)              | 75(19)                  |
| Forced sex in last one year           | 125(20)              | 52(13)                  |
| Knowledge regarding confidential HTC  | 397(65)              | 291(73)                 |
| Participated in discussion in HIV     | 84(29)               | 192(79)                 |
| Participated in HIV awareness program | 169(28)              | 185(46)                 |
| Participated in AIDS day              | 238(39)              | 208(52)                 |
| Participated in Condom Day            | 207(34)              | 220(55)                 |
| Participated in Workshop for HIV      | 110(18)              | 68(17)                  |
| Received demonstration on Condon Use  | 61(10)               | 44(11)                  |
| Comprehensive Knowledge on condom     | 122(20)              | 240(60)                 |
| <b>Psychosocial</b>                   |                      |                         |
| Stigma                                | 295(48)              | 253(63)                 |
| Suicidal thought                      | 210(34)              | 107(27)                 |
| Distressed / Depressed                | 268 (44)             | 171(43)                 |
| SSQS <sup>^</sup>                     |                      |                         |
| Satisfied                             | 530(87)              | 390(97)                 |
| Dissatisfied                          | 80(3)                | 10(3)                   |

\*MSM/TG – Men who have sex with men/transgender, FSW – female sex workers, HIV- Human Immunodeficiency Virus., AIDS- Acquired immune deficiency syndrome, HTC-HIV Testing and Counselling, ^SSQS- The Social Support Questionnaire Score.

## STROBE Statement—checklist of items that should be included in reports of observational studies

|                      | Item No | Recommendation                                                                                                                                                                                                                                                                                                                                                                                                                                                         | Current paper                                                                                                                             |
|----------------------|---------|------------------------------------------------------------------------------------------------------------------------------------------------------------------------------------------------------------------------------------------------------------------------------------------------------------------------------------------------------------------------------------------------------------------------------------------------------------------------|-------------------------------------------------------------------------------------------------------------------------------------------|
| Title and abstract   | 1       | (a) Indicate the study's design with a commonly used term in the title or the abstract                                                                                                                                                                                                                                                                                                                                                                                 | Done. In abstract. Line 26                                                                                                                |
|                      |         | (b) Provide in the abstract an informative and balanced summary of what was done and what was found                                                                                                                                                                                                                                                                                                                                                                    | Done. Line 23-44                                                                                                                          |
| <b>Introduction</b>  |         |                                                                                                                                                                                                                                                                                                                                                                                                                                                                        |                                                                                                                                           |
| Background/rationale | 2       | Explain the scientific background and rationale for the investigation being reported                                                                                                                                                                                                                                                                                                                                                                                   | Done. Line 64-94                                                                                                                          |
| Objectives           | 3       | State specific objectives, including any pre-specified hypotheses                                                                                                                                                                                                                                                                                                                                                                                                      | Done. Line 95-97. There was no pre-specified hypothesis. We wanted to explore the risk factors for non-utilization of HIV testing centre. |
| <b>Methods</b>       |         |                                                                                                                                                                                                                                                                                                                                                                                                                                                                        |                                                                                                                                           |
| Study design         | 4       | Present key elements of study design early in the paper                                                                                                                                                                                                                                                                                                                                                                                                                | Done. Line 109-111                                                                                                                        |
| Setting              | 5       | Describe the setting, locations, and relevant dates, including periods of recruitment, exposure, follow-up, and data collection                                                                                                                                                                                                                                                                                                                                        | Done. Line 112-138                                                                                                                        |
| Participants         | 6       | (a) <i>Cohort study</i> —Give the eligibility criteria, and the sources and methods of selection of participants. Describe methods of follow-up<br><i>Case-control study</i> —Give the eligibility criteria, and the sources and methods of case ascertainment and control selection. Give the rationale for the choice of cases and controls<br><i>Cross-sectional study</i> —Give the eligibility criteria, and the sources and methods of selection of participants | Done. Line 139-158 (cross-sectional analytic study)                                                                                       |
|                      |         | (b) <i>Cohort study</i> —For matched studies, give matching criteria and number of exposed and unexposed<br><i>Case-control study</i> —For matched studies, give matching criteria and the number of controls per case                                                                                                                                                                                                                                                 |                                                                                                                                           |
| Variables            | 7       | Clearly define all outcomes, exposures, predictors, potential confounders, and effect modifiers. Give diagnostic criteria, if applicable                                                                                                                                                                                                                                                                                                                               | Done. Line 157-172                                                                                                                        |

|                                                                                                                |                              |    |                                                                                                                                                                                                                                                                                                                                                                                                                                                                                                                          |                                                                              |
|----------------------------------------------------------------------------------------------------------------|------------------------------|----|--------------------------------------------------------------------------------------------------------------------------------------------------------------------------------------------------------------------------------------------------------------------------------------------------------------------------------------------------------------------------------------------------------------------------------------------------------------------------------------------------------------------------|------------------------------------------------------------------------------|
| 1<br>2<br>3<br>4<br>5<br>6<br>7                                                                                | Data sources/<br>measurement | 8* | For each variable of interest, give sources of data and details of methods of assessment (measurement). Describe comparability of assessment methods if there is more than one group                                                                                                                                                                                                                                                                                                                                     | Done. Line 110-111 and 157-171.<br>Comparability described in lines 183-190. |
| 8<br>9                                                                                                         | Bias                         | 9  | Describe any efforts to address potential sources of bias                                                                                                                                                                                                                                                                                                                                                                                                                                                                | Lines 183-190                                                                |
| 10                                                                                                             | Study size                   | 10 | Explain how the study size was arrived at                                                                                                                                                                                                                                                                                                                                                                                                                                                                                | Line 139-156                                                                 |
| 11<br>12<br>13<br>14<br>15                                                                                     | Quantitative variables       | 11 | Explain how quantitative variables were handled in the analyses. If applicable, describe which groupings were chosen and why                                                                                                                                                                                                                                                                                                                                                                                             | Lines 173-190                                                                |
| 16<br>17<br>18<br>19<br>20<br>21<br>22<br>23<br>24<br>25<br>26<br>27<br>28<br>29<br>30<br>31<br>32<br>33<br>34 | Statistical methods          | 12 | (a) Describe all statistical methods, including those used to control for confounding<br>(b) Describe any methods used to examine subgroups and interactions<br>(c) Explain how missing data were addressed<br>(d) <i>Cohort study</i> —If applicable, explain how loss to follow-up was addressed<br><i>Case-control study</i> —If applicable, explain how matching of cases and controls was addressed<br><i>Cross-sectional study</i> —If applicable, describe analytical methods taking account of sampling strategy | Done. Line 173-190.<br>Lines 183-190.<br>Not applicable.<br>Lines 178-182    |
| 35                                                                                                             |                              |    | (e) Describe any sensitivity analyses                                                                                                                                                                                                                                                                                                                                                                                                                                                                                    | Not applicable.                                                              |

Continued on next page

1  
2  
3  
4  
5  
6  
7  
8  
9  
10  
11  
12  
13  
14  
15  
16  
17  
18  
19  
20  
21  
22  
23  
24  
25  
26  
27  
28  
29  
30  
31  
32  
33  
34  
35  
36  
37  
38  
39  
40  
41  
42  
43  
44  
45  
46  
47  
48  
49  
50  
51  
52  
53  
54  
55  
56  
57  
58  
59  
60

| <b>Results</b>    |     |                                                                                                                                                                                                              |                    |
|-------------------|-----|--------------------------------------------------------------------------------------------------------------------------------------------------------------------------------------------------------------|--------------------|
| Participants      | 13* | (a) Report numbers of individuals at each stage of study—eg numbers potentially eligible, examined for eligibility, confirmed eligible, included in the study, completing follow-up, and analysed            | Line 203-204       |
|                   |     | (b) Give reasons for non-participation at each stage                                                                                                                                                         | Not applicable     |
|                   |     | (c) Consider use of a flow diagram                                                                                                                                                                           | Not applicable     |
| Descriptive data  | 14* | (a) Give characteristics of study participants (eg demographic, clinical, social) and information on exposures and potential confounders                                                                     | Done. Line 204-207 |
|                   |     | (b) Indicate number of participants with missing data for each variable of interest                                                                                                                          | No missing data    |
|                   |     | (c) <i>Cohort study</i> —Summarise follow-up time (eg, average and total amount)                                                                                                                             | Not applicable     |
| Outcome data      | 15* | <i>Cohort study</i> —Report numbers of outcome events or summary measures over time                                                                                                                          |                    |
|                   |     | <i>Case-control study</i> —Report numbers in each exposure category, or summary measures of exposure                                                                                                         |                    |
|                   |     | <i>Cross-sectional study</i> —Report numbers of outcome events or summary measures                                                                                                                           | Done. 205-206      |
| Main results      | 16  | (a) Give unadjusted estimates and, if applicable, confounder-adjusted estimates and their precision (eg, 95% confidence interval). Make clear which confounders were adjusted for and why they were included | Lines 209-214      |
|                   |     | (b) Report category boundaries when continuous variables were categorized                                                                                                                                    | Lines 162-166      |
|                   |     | (c) If relevant, consider translating estimates of relative risk into absolute risk for a meaningful time period                                                                                             | Not applicable     |
| Other analyses    | 17  | Report other analyses done—eg analyses of subgroups and interactions, and sensitivity analyses                                                                                                               | Not applicable     |
| <b>Discussion</b> |     |                                                                                                                                                                                                              |                    |
| Key results       | 18  | Summarise key results with reference to study objectives                                                                                                                                                     | Done. Line 239-248 |
| Limitations       | 19  | Discuss limitations of the study, taking into account sources of potential bias or imprecision. Discuss both direction and magnitude of any potential bias                                                   | Done. Line 300-306 |
| Interpretation    | 20  | Give a cautious overall interpretation of                                                                                                                                                                    | Done. Line 309-312 |

1  
2 results considering objectives, limitations,  
3 multiplicity of analyses, results from similar  
4 studies, and other relevant evidence

---

5 Generalisability 21 Discuss the generalisability (external Done. Line 299-300  
6 validity) of the study results

---

7  
8 **Other information**

---

9 Funding 22 Give the source of funding and the role of the Done. Line 315-333  
10 funders for the present study and, if  
11 applicable, for the original study on which  
12 the present article is based

13  
14  
15 \*Give information separately for cases and controls in case-control studies and, if applicable, for exposed and  
16 unexposed groups in cohort and cross-sectional studies.  
17

18  
19 **Note:** An Explanation and Elaboration article discusses each checklist item and gives methodological background and  
20 published examples of transparent reporting. The STROBE checklist is best used in conjunction with this article (freely  
21 available on the Web sites of PLoS Medicine at <http://www.plosmedicine.org/>, Annals of Internal Medicine at  
22 <http://www.annals.org/>, and Epidemiology at <http://www.epidem.com/>). Information on the STROBE Initiative is  
23 available at [www.strobe-statement.org](http://www.strobe-statement.org).  
24  
25  
26  
27  
28  
29  
30  
31  
32  
33  
34  
35  
36  
37  
38  
39  
40  
41  
42  
43  
44  
45  
46  
47  
48  
49  
50  
51  
52  
53  
54  
55  
56  
57  
58  
59  
60

# BMJ Open

## Why don't key populations access HIV testing and counselling centres in Nepal? Findings based on national surveillance survey

|                                 |                                                                                                                                                                                                                                                                                                                                                                                                                                                                                                       |
|---------------------------------|-------------------------------------------------------------------------------------------------------------------------------------------------------------------------------------------------------------------------------------------------------------------------------------------------------------------------------------------------------------------------------------------------------------------------------------------------------------------------------------------------------|
| Journal:                        | <i>BMJ Open</i>                                                                                                                                                                                                                                                                                                                                                                                                                                                                                       |
| Manuscript ID                   | bmjopen-2017-017408.R1                                                                                                                                                                                                                                                                                                                                                                                                                                                                                |
| Article Type:                   | Research                                                                                                                                                                                                                                                                                                                                                                                                                                                                                              |
| Date Submitted by the Author:   | 29-Jun-2017                                                                                                                                                                                                                                                                                                                                                                                                                                                                                           |
| Complete List of Authors:       | Shrestha, Rachana; Public Health and Environment Research Center Philip, Sairu; Government T.D Medical College, Alappuzha, Kerala, India, Community Medicine<br>Shewade, Hemant; International Union Against Tuberculosis and Lung Disease, South-East Asia Regional Office, Operational Research Rawal, Bir; National Centre for AIDS & STD Control, Ministry of Health Deuba, Keshab; Public Health and Environment Research Center, ; Karolinska Institutet , Department of Public Health Sciences |
| <b>Primary Subject Heading</b>: | Public health                                                                                                                                                                                                                                                                                                                                                                                                                                                                                         |
| Secondary Subject Heading:      | HIV/AIDS, Public health                                                                                                                                                                                                                                                                                                                                                                                                                                                                               |
| Keywords:                       | HTC, MSM/TG, FSW, Nepal                                                                                                                                                                                                                                                                                                                                                                                                                                                                               |
|                                 |                                                                                                                                                                                                                                                                                                                                                                                                                                                                                                       |

SCHOLARONE™  
Manuscripts

Only

1  
2  
3 1 **Why don't key populations access HIV testing and counselling centres in**  
4  
5  
6 2 **Nepal? Findings based on national surveillance survey**

7  
8  
9 3 **Authors:** Rachana Shrestha<sup>1\*</sup>, Sairu Philip<sup>2</sup>, Hemant Deepak Shewade<sup>3</sup>, Bir Rawal<sup>4</sup>, Keshab  
10 4 Deuba<sup>5</sup>

11  
12  
13  
14 5 **Affiliations:**<sup>1</sup>Public Health and Environment Research Center, Kathmandu Nepal,  
15  
16 <sup>2</sup>Government T.D Medical College, Alappuzha, Kerala, India, <sup>3</sup>International Union Against  
17 6 Tuberculosis and Lung Disease (The Union), South-East Asia Office, New Delhi,  
18 7 India, <sup>4</sup>National Centre for AIDS and STD Control (NCASC), Ministry of Health, Kathmandu,  
19 8 Nepal, <sup>5</sup>Department of Public Health Sciences, KarolinskaInstitutet, Stockholm, Sweden.  
20  
21  
22  
23  
24  
25  
26  
27  
28

29  
30  
31  
32  
33  
34  
35  
36  
37  
38  
39  
40  
41  
42  
43  
44  
45  
46  
47  
48  
49  
50  
51  
52  
53  
54  
55  
56  
57  
58  
59  
60

11 \*Authors responsible for the correspondence: Rachana Shrestha, Public Health and  
12 Environment Research Center (PERC), Sanepa Lalitpur Nepal-44600  
13 Web: <http://percnepal.org/home/index>Tel: +977 9860999428;  
14 Email: [rachana.shrestha@percnepal.org](mailto:rachana.shrestha@percnepal.org)

16 **Running title:** IBBS 2012Nepal: factors for non-utilization of HTC

17 **Word count:** Abstract -246; Main text - 2577; Tables – 2; Figure – 1; Web-only table – 1;  
18 Web-only box - 1

19 **Keywords:** Key populations; HIV voluntary testing and counselling; MSM;  
20 Transgender;FSW; SORT IT; Nepal



1  
2  
3 **ABSTRACT**  
4  
5

6 **Objectives:** To assess the demographic, behavioural, psychosocial and structural factors  
7  
8 associated with non-utilization of HIV testing and counselling centres (HTC) by female sex  
9  
10 workers (FSW) and men who have sex with men/ transgender (MSM/TG).  
11

12 **Methods:** This study involved a cross-sectional design. We used the national surveillance  
13  
14 survey data of 2012 which included 610 FSW and 400 MSM/TG recruited randomly from 22  
15  
16 and three districts of Nepal respectively. Adjusted prevalence ratio (aPR) and 0.95 confidence  
17  
18 interval (CI) using modified Poisson regression was used to assess and infer the association  
19  
20 between outcome (non-utilization of HTC in last year) and independent variables.  
21  
22

23 **Results:** Non-utilization of HTC in last one year was 54% for FSW and 55% for MSM/TG.  
24

25  
26 The significant factors for non-utilization of HTC among FSW were:  
27  
28 depression [aPR=1.4(1.1-1.6)], injectable drug abuse (ever) [aPR=1.4(1.1-1.8)], participation  
29  
30 (ever) in HIV awareness programmes [aPR=1.2 (1.0-1.4)], experience of forced sex in  
31  
32 previous year [aPR=1.1 (1.0-1.3)] and absence of dependents in the family [aPR=1.1(1.0-1.3)].  
33  
34

35 Non-utilisation of HTC among MSM/TG had significant association with age 16-19 years  
36  
37 [aPR=1.4(1.1-1.7)], non-condom use [aPR=1.2 (1.0-1.4)], participation (ever) in HIV  
38  
39 awareness programs [aPR=1.6 (1.3-2.0)], physical assault in previous year [aPR=1.8(1.0-  
40  
41 3.1)], experience of forced sex in previous year [aPR=0.5(0.3-0.9)]  
42  
43

44 **Conclusion:** Although limited by cross-sectional design, we found many programmatically  
45  
46 relevant findings. Creative strategies should be envisaged for effective behavioural change  
47  
48 communication to improve access to HIV testing. Psychosocial and structural interventions  
49  
50 should be integrated with HIV prevention programmes to support key populations in  
51  
52 accessing HIV testing.  
53  
54

55  
56  
57  
58  
59  
60

1  
2  
3 47  
4  
5  
6 48  
7  
8  
9  
10 49  
11  
12  
13 50  
14  
15  
16 51  
17  
18  
19  
20 52  
21  
22  
23 53  
24  
25  
26 54  
27  
28  
29  
30 55  
31  
32  
33 56  
34  
35  
36 57  
37  
38  
39  
40 58  
41  
42  
43 59  
44  
45  
46 60  
47  
48  
49  
50 61  
51  
52  
53 62  
54  
55  
56  
57 63  
58  
59  
60

### **Summary – strengths and limitations of this study**

1. In the Nepal IBBS 2012 survey, psychosocial and structural factors were added.
2. This is the first study to explore the relation of psychosocial and structural factors with HTC non-utilization among FSW and MSM/TG in Nepal
3. Social desirability bias, recall bias due to the assessment of past exposures might have influenced the self-reported variables.

## 64 INTRODUCTION

65 Globally, at the end of 2015, an estimated 36.7 million people were living with HIV of  
66 which 47% did not know their HIV status and hence were deprived of antiretroviral therapy  
67 and care[1]. According to UNAIDS 90-90-90 target, by 2020, 90% of all individuals living  
68 with HIV should know their HIV status, 90% of all individuals with diagnosed HIV infection  
69 should receive sustained antiretroviral therapy, and 90% of all individuals receiving  
70 antiretroviral therapy should have viral suppression. By 2030 the AIDS epidemic will come to  
71 an end as public health threat if these three targets are achieved[2].

72 The key population are those who have a high risk of acquiring or transmitting HIV.  
73 Global studies have shown that key populations are 13 to 22 times more likely to be infected  
74 with HIV than the general population[3]. Key population includes female sex workers (FSW)  
75 and men who have sex with men (MSM)/ transgender (TG)[4]. FSW and MSM/TG are 13-14  
76 times more likely to be infected with HIV than the general population[3].

77 World Health Organization (WHO) recommended integrated biological and  
78 behavioural surveillance (IBBS) survey to monitor HIV prevalence and risk behaviours among  
79 key populations. In the late 90s, IBBS was started by Government of Nepal as part of  
80 response plan against HIV/AIDS epidemic[5]. HIV testing and counselling (HTC) is the entry  
81 point for HIV care services in Nepal and are provided free of cost to all. HTC is a critical  
82 intervention in achieving the first 90, i.e., people living with HIV should know their HIV  
83 status. Though the first step is crucial in identifying people living with HIV, the retention in  
84 care of PLHIV in second 90 and third 90 is equally necessary to maximise the treatment and  
85 prevention benefits of antiretroviral therapy[6,7]. National consolidated guidelines for  
86 preventing and treating HIV in Nepal had recommended various approaches  
87 for maximising HIV testing in both facility and community-based settings[4,5]. Different

1  
2  
3 88 surveillance surveys conducted in Nepal found that the non-utilization of HTC was low, i.e.,  
4  
5 89 around 50%in FSW and MSM/TG[8].  
6  
7

8 90 There was a substantial decline in the proportion of FSW visiting HTC in 2016  
9  
10 91 compared to 2012 as revealed by IBBS 2016 [9]. Among FSW, decreasing trend in HIV  
11  
12 92 prevalence was accompanied by an increasing trend in lack of comprehensive knowledge  
13  
14 93 regarding HIV [9,10]. The UNAIDS target of 90% assessment of HIV status by 2020 might  
15  
16 94 not be reached in Nepal unless factors associated with non-utilization of HTC are identified  
17  
18 95 and addressed [2,11,12].  
19  
20  
21

22 96 Psychosocial variables like distress/ depression were included only in IBBS 2012  
23  
24 97 survey and were found to be high(around 50 percent)of the key population(people who inject  
25  
26 98 drugs, FSW and MSM/TG) studied[10,13,14].Different studies demonstrate that the  
27  
28 99 psychosocial problems (depression, drug abuse and suicidality) increase the likelihood of  
29  
30 100 HIV-related risk behaviours amongFSW and MSM/TG in Nepal [15,16]. Studies conducted  
31  
32 101 outside of Nepal (India and USA)among key populations (MSM and FSW) found that the  
33  
34 102 psychosocial (depression, substance abuse, violence) and structural factors not only increase  
35  
36 103 their risk behaviours but also lowers the uptake of behavioural interventions.[17–19]. The  
37  
38 104 identification of effects of psychosocial and structural factors in the uptake of HTC would  
39  
40 105 help us to improve existing challenges of reaching key populations in Nepal. However such  
41  
42 106 evidence is very limited in Nepal. Therefore using the IBBS 2012 data, we aimed to  
43  
44 107 determine the demographic, behavioural, psychosocial and structural risk factors associated  
45  
46 108 with non-utilization of HTC in last one year byFSW and MSM/TG in Nepal.  
47  
48  
49  
50  
51

52 109

53  
54  
55 110

56  
57  
58 111  
59  
60

1  
2  
3 112 **METHODS**  
4  
5

6 113 **Study design**  
7

8  
9 114 This study was a cross-sectional study involving secondary data of FSW and MSM/TG  
10  
11 115 collected from IBBS survey of 2012 in Nepal.  
12

13  
14 116 **Setting**  
15

16  
17 117 Nepal, with a population of 27 million, is a low-middle income, land-locked country  
18  
19 118 in South-East Asia[20]. It shares borders with China in the north and India to the south, east  
20  
21 119 and west. Nepal is divided into 75 districts and consists of a Himalayan mountainous region  
22  
23 120 in the north and open terrain (*Terai* in local language) in the south. HTC service was first  
24  
25 121 started in Nepal in 1995 by the National programme for AIDS and sexually transmitted  
26  
27 122 disease. There are over 235 HTC service sites in Nepal as of July 2016.  
28  
29

30 123 *HTC in Nepal*  
31

32  
33 124 In Nepal, HTC is the entry point for HIV prevention services whose primary aim is to  
34  
35 125 identify people living with HIV and link them to treatment. It is voluntary and provided free  
36  
37 126 of cost. Health facilitators should maintain confidentiality and obtain informed consent during  
38  
39 127 pre and post-test counselling. According to national guidelines, key populations are expected  
40  
41 128 to visit HTC in every 6-12 months[5]. Besides that, community-based interventions are also  
42  
43 129 prioritised in which peer educators and outreach workers are mobilised in the community.  
44  
45 130 Peer educators are volunteers who convey crucial information (proper condom use, HIV  
46  
47 131 testing, etc.) to key populations in informal (cruising areas like bus park or public park) and  
48  
49 132 formal setting (drop-in centres) to distribute condoms, safe needles/ syringes or aware them  
50  
51 133 about available treatment, care and support services.  
52  
53  
54

55  
56 134  
57  
58  
59  
60

1  
2  
3 135 *IBBS 2012 Survey, Nepal*

4  
5  
6 136 National Centre for AIDS and STD control (NCASC), Nepal, conducted two separate  
7  
8 137 cross-sectional IBBS surveys between September and November 2012 for FSW and  
9  
10 138 MSM/TG respectively. FSW were defined as “women aged 16 years and above reporting to  
11  
12 139 have been paid in cash or kind for sex with a male within the last six months.” MSM/TG were  
13  
14 140 defined as “those males aged 16 years or above who have had sexual relations (either oral or  
15  
16 141 anal) with another male in the 12 months preceding the survey.”(7). A survey among  
17  
18 142 FSW was conducted in 22 Terai highway districts and for MSM/TG in three districts of  
19  
20 143 Kathmandu valley (figure 1).

#### 21 22 23 24 144 **Study population and sampling**

25  
26  
27 145 The FSW were recruited using two-stage cluster sampling; stage 1 was the selection of  
28  
29 146 clusters, and stage 2 was the random selection of an equal number of participants from each  
30  
31 147 selected cluster to ensure a self-weighted sample. A cluster was defined as having at least 30  
32  
33 148 sex workers in that area; those with fewer than 30 sex workers were merged with nearby  
34  
35 149 locations to form a cluster. To identify clusters, mapping was performed with the support of  
36  
37 150 local non-governmental organisations to determine areas where sex work is common and  
38  
39 151 noting the estimated number of possible survey participants in each area. Seventy clusters out  
40  
41 152 of a total of 401 clusters were selected based on probability proportionate to size (PPS).

42  
43  
44  
45  
46 153 The MSM were recruited using respondent driven sampling (RDS) in three districts of  
47  
48 154 Kathmandu valley (Kathmandu, Lalitpur and Bhaktapur). To begin with, a total of eight  
49  
50 155 MSM/TG were recruited as seed. Those seeds were informed about survey protocols and  
51  
52 156 procedure and were encouraged to recruit other eligible individuals from their social networks  
53  
54 157 randomly to participate in the survey. These initial seeds were provided three coupons to pass  
55  
56 158 to their peers who are eligible to participate in the survey.

1  
2  
3 159 Detailed methodology and sampling strategies for IBBS surveys have been described  
4  
5 160 previously [10,13–15].  
6  
7  
8 161

### 11 162 **Data variables for the present study**

14 163 IBBS survey included information on behavioural factors like uptake of  
15  
16 164 interventions for HIV, demographic, behavioural, psychosocial and structural  
17  
18 165 variables[10,13,14]. Structural factors included environmental/context conditions which  
19  
20 166 were outside the control of the individual, but which could influence his/her perceptions,  
21  
22 167 behaviour and health [21]. Psychosocial variables (social support and depression) were  
23  
24 168 assessed using social support questionnaire short form (SSQS) and centre for  
25  
26 169 epidemiological studies depression (CES-D) scale respectively. The CES-D tool showed  
27  
28 170 high reliability and validity in assessing depression in diverse groups such as PLHIV,  
29  
30 171 women and MSM with Cronbach's alpha  $\geq 0.85$  and comparative fit indices more than  
31  
32 172 0.90[8,22]. The CES-D is extensively normed and validated tool[23]. Similarly the  
33  
34 173 reliability and construct validity of scale SSQS reported high ( $>0.90$ ) by different studies  
35  
36 174 [24,25].  
37  
38  
39  
40  
41 175

43 176 Median score of  $<5$  in SSQS scale was interpreted as 'dissatisfied with social support'.  
44  
45 177 CES-D scale more than 16 and 22 were to classify distress and depression respectively. We  
46  
47 178 also assessed suicidality under psychosocial-related variables. Prevalence of demographic,  
48  
49 179 behavioural, psychosocial and structural factors have been summarised in **web-only table 1**.  
50  
51

52  
53 180 A self-reported visit to an HTC facility in past year by the FSW and MSM/TG was  
54  
55 181 chosen as the outcome variable. The outcome variable assessed by asking 'Have you visited  
56  
57 182 (Yes vs. No) any HTC centers in the last 12 months?' (Reasons for visiting: pre-post  
58  
59  
60

1  
2  
3 183 HIV/AIDS test counselling, information on HIV/AIDS window period, HIV/AIDS test result,  
4  
5 184 counselling on using condom correctly in each sexual intercourse).In addition to  
6  
7 185 aforementioned reasons, discussion on safe injecting behaviour was also one of the self-  
8  
9 186 reported reasons among PWID for visitingHTCcentre.The independent variables  
10  
11 187 (demographic, behavioural, psychosocial and structural risk variables)selected in this study  
12  
13  
14 188 have been described in web-only box 1.

### 17 189 **Analysis and statistics**

19  
20 190 Data analysis was done separately for FSW and MSM/TG. Data was analysed  
21  
22 191 usingSTATA (version 12.1 STATA Corp., College Station, TX, USA).Categorical variables  
23  
24 192 were described using frequency and proportions. The unadjusted and adjusted analysis was  
25  
26 193 performed separately for FSW and MSM/TG to assess the association of factors with the  
27  
28 194 outcome (not utilising HTC in last one year). All the RDS-related descriptive output were  
29  
30 195 adjusted to represent the structure of the study population (MSM/TG) which was based on  
31  
32 196 information regarding who recruited whom, and the relative size of the respondent's network  
33  
34 197 using the Volz–Heckathorn estimator (RDS II) (20).To assess the network size among  
35  
36 198 MSM/TG, the following question was asked: “How many other MSM/TG do you know who  
37  
38 199 also know you well? (Knowing someone is defined as being able to contact them and having  
39  
40 200 had to contact with them in the past 12 months).”RDS-adjusted values presented in web-only  
41  
42 201 table 2. Convergence plot for outcome variable is presented in web-only figure 1.Adjustment  
43  
44 202 for clustering of two-stage cluster sampling was not required in FSW data as it was a self-  
45  
46 203 weighted sample.

50  
51  
52 204 .Bivariate associations between each independent variable and non-utilization of HTC  
53  
54 205 were calculated using variance inflation factor after assessment for multicollinearity.Variables  
55  
56 206 with a p-value of <0.2 in the bivariate analysis were included in the regression model (enter  
57  
58  
59  
60



1  
2  
3 207 method). Adjusted prevalence ratios (aPR)with 95% confidence intervals (CI)were calculated  
4  
5 208 by fitting a Poisson regression with robust variance estimates.The variables included in  
6  
7 209 multivariate model (adjusted prevalence ratio)for FSWwereage group, educational status,  
8  
9 210 condom use at last sex, ever inject drugs, ever participated in HIV awareness  
10  
11 211 program,physical assault in last year, forced sex in last year, having dependents, police  
12  
13 212 detention in last 6 months, stigma towards HIV and distress/depression.The variables included  
14  
15 213 in adjusted prevalence ratio forMSM/TG were age group, condom use atlast sex, drinking  
16  
17 214 alcohol, ever participated in HIV awareness programme, physical assault in last year, forced  
18  
19 215 sex in last year, and discrimination in job and suicidal thought ‘ever’.

22  
23  
24 216 Initially, we used the log-binomial model to assess the association between  
25  
26 217 independent and outcome variable of interest. However, the log-binomial model fails to  
27  
28 218 converge. To overcome the effects of failed convergence, we have used the Poisson  
29  
30 219 regression with robust variance estimates as recommended by the Tyler et al.[26].Poisson  
31  
32 220 regression with robust variance can be used as an alternative of logistic regression and also  
33  
34 221 provides accurate estimates in the cross-sectional study with binary outcome of interest[27].  
35  
36 222 We have calculated the prevalence ratio because it is easy to interpret than the odds ratio.  
37  
38  
39

40 223

#### 41 224 **Ethical Considerations**

42  
43  
44 225 Ethics approval for IBBS survey 2012 was given by the Nepal Health Research  
45  
46 226 Council (NHRC), Kathmandu, Nepal.Ethics approval for the analysis of secondary data for  
47  
48 227 this study was taken in 2016 from Ethics Advisory Group, the International UnionAgainst  
49  
50 228 Tuberculosis and Lung Disease (The Union), Paris, France.Administrative approval was also  
51  
52 229 receivedfromNCASC and Public Health and Environment Research Center (PERC)  
53  
54  
55 230 Nepal.Waiver of informed consent was sought and approved by the ethics committee as this  
56  
57 231 study involved analysis of secondary data.  
58  
59  
60

## 232 RESULTS

233 IBBS survey 2012 included 610 FSW with the response rate among FSW was 88.9%.

234 The non-responders were replaced by the randomly selected another FSW of the same  
235 cluster. The HIV prevalence was 1 percent among FSW. The proportion of FSW in the age group  
236 16 to 19 was 13.9%. The prevalence of non-utilization of HTC in last one year was 54%  
237 among FSW. More than half FSW (59%) were married, 24% of them were divorced or  
238 separated. Two-third (68%) of FSW were literate (Table 1 and web-only Table 1).

239 IBBS survey 2012 included 400 MSM/TG, and we did not record non-response among  
240 MSM/TG because of nature of sampling technique, i.e., study participants enrol the other  
241 possible participants in the study. The HIV prevalence was 3.3 percent among MSM/TG. The  
242 proportion of MSM/TG in the age group 16 to 19 was 17.2%. Non-utilization of HTC in last  
243 one year was 55% for MSM/TG. The majority of the MSM/TG were unmarried (72%)  
244 whereas very few of them were illiterate (3%). Other characteristics of the FSW and MSM/TG  
245 are presented in web-only table 2.

246 The factors associated with non-utilisation of HTC in last one year among FSW and  
247 MSM/TG are summarised in **Table 1** and **Table 2** respectively. In multivariable analysis, the  
248 association between non-utilisation of HTC and distress/depression remained significant. FSW  
249 experiencing distress (APR: 1.4, 95% CI: 1.1–1.5) and depression (APR: 1.4, 95% CI: 1.1–1.6)  
250 were more likely to non-utilization of HTC in the past year. Similarly FSW who were injecting  
251 drugs (ever) (APR: 1.4, 95% CI: 1.1–1.8), ever participated in HIV awareness programmes  
252 (APR: 1.2, 95% CI: 1.0–1.4), or no dependents in the family (APR: 1.1, 95% CI: 1.0–1.3)  
253 were more likely to non-utilization of HTC. FSW who experienced forced sex (APR: 1.1, 95%  
254 CI: 1.0–1.3) in the last 12 months were also more likely to non-utilization of HTC (Table 1).  
255 episode

256 MSM/TG who were adolescents aged 16-19 years (APR: 1.4, 95% CI: 1.1–1.7) and  
 257 experienced physical assault (APR: 1.8, 95% CI: 1.0–3.1) were more likely to non-utilization  
 258 of HTC. However, MSM/TG who experienced forced sex (APR: 0.5, 95% CI: 0.3–0.9) were  
 259 less likely to non-utilization of HTC. MSM/TG who did not use condom during their last  
 260 sex (APR: 1.2, 95% CI: 1.0–1.4) or participated in HIV awareness programs (APR: 1.6, 95%  
 261 CI: 1.3–2.0) were more likely to non-utilization of HTC (Table 2).

262

263 **Table 1.** Factors associated with non-utilization of HIV Testing and Counselling (HTC)  
 264 centres among female sex workers surveyed under Integrated Biological and Behavioural  
 265 Surveillance Survey, 2012, Nepal

| Variables                                   | Total<br>N             | HTC not<br>Utilised <sup>@</sup><br>n(%) | Adj PR** |
|---------------------------------------------|------------------------|------------------------------------------|----------|
| <b>Total</b>                                | <b>610</b>             | <b>330(54)</b>                           |          |
| <b>Demographic</b>                          |                        |                                          |          |
| Age in years                                | 16-19                  | 85                                       | 51 (60)  |
|                                             | 20-24                  | 130                                      | 73(56)   |
|                                             | >25                    | 395                                      | 206 (52) |
| Educational Status                          | Illiterate             | 196                                      | 98 (50)  |
|                                             | Literate               | 414                                      | 232 (56) |
| Marital Status                              | Married                | 360                                      | 197 (55) |
|                                             | Unmarried              | 102                                      | 60 (59)  |
|                                             | Separated/<br>Divorced | 148                                      | 73 (49)  |
| Having dependents                           | Yes                    | 341                                      | 169 (50) |
|                                             | No                     | 269                                      | 161 (60) |
| <b>Behavioural</b>                          |                        |                                          |          |
| Condom use in last sex                      | Yes                    | 461                                      | 256(56)  |
|                                             | No                     | 149                                      | 74(32)   |
| Ever inject drugs                           | Yes                    | 40                                       | 29(73)   |
|                                             | No                     | 570                                      | 301(53)  |
| <b>Structural</b>                           |                        |                                          |          |
| Ever participated in HIV awareness programs | Yes                    | 169                                      | 102(52)  |
|                                             | No                     | 441                                      | 228(60)  |
| Physical assault in last year               | Yes                    | 81                                       | 36 (44)  |
|                                             | No                     | 529                                      | 294 (56) |
| Housing Instability                         | Homeless               | 15                                       | 6 (40)   |
|                                             | Own home               | 320                                      | 169 (53) |
|                                             | Rented                 | 275                                      | 155 (56) |
| Forced sex in last year                     | Yes                    | 125                                      | 84 (67)  |
|                                             | No                     | 485                                      | 246 (51) |
| Police detention in last 6 months           | Yes                    | 81                                       | 37 (46)  |
|                                             | No                     | 529                                      | 293 (55) |

|                                    |              |     |          |               |
|------------------------------------|--------------|-----|----------|---------------|
| Client refusal to pay in last year | Yes          | 153 | 89 (58)  | -             |
|                                    | No           | 457 | 241 (53) | -             |
| <b>Psychosocial</b>                |              |     |          |               |
| Stigma towards HIV                 | Yes          | 295 | 168(57)  | 1.0(0.9-1.2)  |
|                                    | No           | 315 | 162(51)  | Ref.          |
| Suicidal thoughts (Ever)           | Yes          | 210 | 117(56)  | -             |
|                                    | No           | 399 | 212 (53) | -             |
| Depression <sup>#</sup>            | Euthymic     | 342 | 159 (46) | Ref.          |
|                                    | Distressed   | 156 | 100 (64) | 1.4(1.1-1.5)* |
|                                    | Depressed    | 112 | 71 (63)  | 1.4(1.1-1.6)* |
| SSQS <sup>^</sup>                  | Satisfied    | 530 | 289(55)  | -             |
|                                    | Dissatisfied | 80  | 41(51)   | -             |

266 <sup>@</sup>Not utilised in last one year; \* p<0.05; \*\*Adjusted prevalence ratio using Poisson regression with robust  
 267 variance estimates (enter method); factors with Unadjusted PR with p<0.2 included in the model and collinearity  
 268 checked; <sup>#</sup>Depression measured using a CES-D scale; <sup>^</sup>SSQS- The Social Support Questionnaire Score.  
 269

270

271 **Table 2.** Factors associated with non-utilization of HIV Testing and Counselling (HTC)  
 272 centres among Men having Sex with Men/Transgender surveyed under Integrated Biological  
 273 and Behavioural Surveillance Survey, 2012, Nepal

| Variables                                   |            | N          | HTC not Utilised <sup>@</sup><br>n(%) <sup>‡</sup> | Adj PR**      |
|---------------------------------------------|------------|------------|----------------------------------------------------|---------------|
| <b>Total</b>                                |            | <b>400</b> | <b>221(55)</b>                                     |               |
| <b>Demographic factors</b>                  |            |            |                                                    |               |
| Age in years                                | 16-19      | 69         | 54(78)                                             | 1.4(1.1-1.7)* |
|                                             | 20-24      | 129        | 73(57)                                             | 1.1(0.9-1.4)  |
|                                             | >25        | 202        | 94(47)                                             | Ref           |
| Educational Status                          | Illiterate | 13         | 7(54)                                              | -             |
|                                             | Literate   | 387        | 214(55)                                            | -             |
| Marital Status                              | Unmarried  | 289        | 163(56)                                            | -             |
|                                             | Married    | 111        | 58(52)                                             | -             |
| <b>Behavioural</b>                          |            |            |                                                    |               |
| Condom use at last sex                      | Yes        | 339        | 177(72)                                            | Ref.          |
|                                             | No         | 61         | 44(52)                                             | 1.2(1.0-1.4)* |
| Drinking Alcohol                            | Yes        | 323        | 186(58)                                            | 1.2(0.9-1.5)  |
|                                             | No         | 77         | 35(45)                                             | Ref.          |
| <b>Structural</b>                           |            |            |                                                    |               |
| Ever Participated in HIV awareness programs | Yes        | 185        | 62(34)                                             | 1.6(1.3-2.0)* |
|                                             | No         | 215        | 159(74)                                            | Ref.          |
| Physical assault in last year               | Yes        | 57         | 10(18)                                             | 1.8(1.0-3.1)* |
|                                             | No         | 343        | 211(62)                                            | Ref.          |
| Housing instability                         | Homeless   | 8          | 4(50)                                              | -             |
|                                             | Own home   | 75         | 42(56)                                             | -             |
|                                             | Rented     | 317        | 175(55)                                            | -             |
| Forced sex in last year                     | Yes        | 52         | 10(19)                                             | 0.5(0.3-0.9)* |
|                                             | No         | 348        | 211(61)                                            | Ref.          |
| Discrimination in Job                       | Yes        | 79         | 17(22)                                             | Ref.          |
|                                             | No         | 321        | 204(64)                                            | 1.3(0.8-2.2)  |
| <b>Psychosocial factors</b>                 |            |            |                                                    |               |
| Stigma towards HIV                          | Yes        | 253        | 138(54)                                            | -             |
|                                             | No         | 147        | 83(56)                                             | -             |

|                         |              |     |         |              |
|-------------------------|--------------|-----|---------|--------------|
| Suicidal thought Ever   | Yes          | 107 | 33(31)  | 0.7(0.5-1.0) |
|                         | No           | 293 | 188(64) | Ref.         |
| Depression <sup>#</sup> | Euthymic     | 220 | 121(59) | -            |
|                         | Distressed   | 83  | 49(53)  | -            |
|                         | Depressed    | 97  | 51(55)  | -            |
| SSQS <sup>^</sup>       | Satisfied    | 390 | 216(55) | -            |
|                         | Dissatisfied | 10  | 5(50)   | -            |

274 **¥Unweighted descriptive statistics.**For RDS-weighted estimates refer to web-only table 2; @Not utilised in  
 275 last one year; \* p<0.05; \*\*Adjusted prevalence ratio using Poisson regression with robust variance estimates  
 276 (enter method); factors with Unadjusted PR with p<0.2 included in model and collinearity checked;<sup>#</sup>Depression  
 277 measured using a CES-D scale; <sup>^</sup>SSQS- The Social Support Questionnaire Score.

## 279 DISCUSSION

280 In IBBS 2012 survey, in addition to individual level variables, psychosocial and  
 281 structural factors were added. To the best of our knowledge, this study is the first to explore  
 282 the relation of psychosocial and structural factors with HTC non-utilization among FSW and  
 283 MSM/TG in Nepal. The uptake of HTC was low (around 55%) amongMSM/ TG in Nepal  
 284 which is consistent with the findings of studies conducted in Assam and Andra Pradesh India,  
 285 Zhejiang province ChinaandBangkokThailand[28–31].Our study also demonstrates a low  
 286 level of uptake of HTC among PWID in Nepal which is even lower (33%) among PWID of  
 287 Manipur and Nagaland in India[32]. The current scenario suggests that the low uptake of HTC  
 288 among MSM/TG and PWID not only threat the timely identification and linking them to  
 289 treatment to improve their health but also increase the risk of secondary transmission from  
 290 HIV-infected MSM/TG and PWID to their partners.Community-based HTC with different  
 291 approaches (mobile testing and door-to-door testing etc.) that found effective in increasing  
 292 uptake of HTC and linking them to HIV care among MSM/TG and PWID in other  
 293 settings[33] need to be evaluated in the context of Nepal. Otherwise, the 90-90-90 targets  
 294 prioritised to improve health and prevention of secondary HIV transmission would not be  
 295 possible in Nepal. This study also found different risk factors for non-utilization of HTC in  
 296 last one year among FSW and MSM/TG.They were demographic: late adolescents

1  
2  
3 297 (MSM/TG); behavioural: injectable drug abuse (FSW) and no condom use at last sex  
4  
5 298 (MSM/TG); structural: participation in HIV awareness programmes (FSW and MSM/TG),  
6  
7 299 forced sex in last one year (risk factor among FSW and protective factor among MSM/TG),  
8  
9  
10 300 absence of dependent members (FSW), physical assault in last year (MSM/TG); and  
11  
12 301 psychosocial: being distressed/depressed (FSW).

13  
14 302 Psychosocial factors play an important role in health services utilisation [16].  
15  
16 303 FSW who had distress or depression (four out of every 10) had a higher prevalence of non-  
17  
18 304 utilization of HTC. This could have resulted in disempowerment and thereby resulting in not  
19  
20 305 accessing HTC services when needed[13,14]. Studies have found that FSW used alcohol and  
21  
22 306 drugs, to reduce stress and to help them cope with their work[17,34]. Gambian study showed  
23  
24 307 that women who experienced forced sex reported severe depression[35]. A study conducted  
25  
26 308 among FSW working outside of the capital city (Kathmandu) found the very high prevalence  
27  
28 309 of depression and the experience of any form violence (verbal, physical and sexual) was also  
29  
30 310 common among them and also associated with depression[36]. Currently, there are no targeted  
31  
32 311 programs that address the mental health problems of FSW in Nepal and lack of laws that  
33  
34 312 protect the rights of sex workers also exacerbating the experience of violence among them.  
35  
36 313 Efforts addressing the experience of violence and its consequences (depression) among  
37  
38 314 FSW are essential in Nepal otherwise it would be difficult to increase uptake of HTC among  
39  
40 315 them.

41  
42  
43  
44  
45 316 According to the IBBS survey report of 2012, old MSM/TG were found to use  
46  
47 317 condoms more when compared to younger ones. Similarly, the median age of first sexual  
48  
49 318 intercourse being 16 years and the fact that the old adolescents (16-19 years) MSM/TG did not  
50  
51 319 significantly access HTC is a cause of concern[10,13]. The risk-taking behaviour in  
52  
53 320 adolescence can compound their risk in acquiring HIV, and hence this group need to be  
54  
55 321 targeted. In Nepal, the blanket approach to implementing interventions (HTC) without  
56  
57  
58  
59  
60

1  
2  
3 322 considering the specific needs of adolescents or young people belonging to key populations  
4  
5 323 might have effects in low uptake of HTC among them. Evidence from China suggests that the  
6  
7 324 use of peer-led community-based rapid HIV test increase the uptake of HIV testing among  
8  
9 325 young MSM[37].

10  
11 326 Not visiting an HTC facility was also associated with not using a condom during last  
12  
13 327 sex among MSM/TG.FSW who were injecting drugs were also less likely to uptake HTC in  
14  
15 328 the last 12 months. Our study findings are consistent with the study conducted among FSW in  
16  
17 329 Vietnam where unprotected sex and injecting drug use associated with less likely to have  
18  
19 330 voluntary HIV test [38]. The findings suggest that we are missing to reach those FSW who  
20  
21 331 were at increased risk for HIV due to their dual risky behaviours such as unprotected sex or  
22  
23 332 injecting drug abuse.

24  
25 333 Some factors affecting utilisation of HTC by MSM/TG were different from that of  
26  
27 334 FSW. In events like forced sex in last year among FSW, it reduced the utilisation of HTCs  
28  
29 335 among FSW. Among MSM/TG, the experience of forced sex led to the utilisation of HTC.  
30  
31 336 The difference might be due to the fact thatMSM/TG are highly networked population than  
32  
33 337 the FSW[39]suchasmost of them are directly and indirectly associated with their community  
34  
35 338 organisations (Blue Diamond Society) which work for the rights of gender and sexuality  
36  
37 339 minorities in Nepal. That may have resulted to seek available services among MSM/TG after  
38  
39 340 experiencing the sexual abuse.

40  
41 341 Participation in HIV awareness programmes by key population showed decreasing  
42  
43 342 trend over the years [10,13]. Participation as a risk factor for non-utilisation of HTC for both  
44  
45 343 FSW and MSM/TG seemed intriguing. The activities which enlisted more participation were  
46  
47 344 short duration events like condom/AIDS day celebration compared to effective training  
48  
49 345 methods like demonstration classes, workshops,etc.(web-only table 1). These aforementioned  
50  
51 346 short-term awareness activities might not have effective in awaringFSW and MSM/TG about  
52  
53  
54  
55  
56  
57  
58  
59  
60

1  
2  
3 347 the importance of HTC. The other explanation for this could be the cross-sectional nature of  
4  
5 348 data. Those who had visited an HTC in last one year might not have felt the need for attending  
6  
7 349 HIV awareness programmes.  
8  
9

10  
11 350 Despite being limited by a cross-sectional design, the findings of this study bring out  
12  
13 351 three major policy implications. First, the intervention to address the burden of depression  
14  
15 352 needs to be an integral part of programmes for FSW and MSM/TG at all levels. Second, HTC  
16  
17 353 should be developed as an empowerment centre or training to improve their skills that help  
18  
19 354 FSW and MSM/TG to tackle physical and sexual abuse. Third, specific prevention  
20  
21 355 programmes should be rolled out to reach adolescent FSW and MSM/TG, and FSW who were  
22  
23 356 practising dual risk behaviours such as inconsistent condom use or injecting drug use. The  
24  
25 357 HTC centre should also consider the specific needs of adolescent FSW or MSM/TG.  
26  
27  
28

29 358 Our study adhered to STROBE guidelines for conduct and report of the study [40]. The  
30  
31 359 findings are generalizable to FSW, and MSM/TG of Nepal as standard sampling strategy was  
32  
33 360 followed for the IBBS survey [10,13–15]. The present study had inherent limitations of  
34  
35 361 analysing secondary data. Certain pertinent variables (for example; injectable drug abuse in  
36  
37 362 last 12 months among MSM/TG) could not be included in the analysis due to missing data.  
38  
39 363 The limitations of the original survey like social desirability bias, recall bias due to the  
40  
41 364 assessment of past exposures might have influenced the self-reported variables. The cross-  
42  
43 365 sectional design itself could result in difficulties in ascertaining temporality between various  
44  
45 366 factors studied and non-utilization of HTC.  
46  
47  
48

## 49 367 **CONCLUSION**

50  
51  
52 368 To conclude, the psychosocial and structural factors are influencing utilisation of HIV  
53  
54 369 testing and counselling centres among FSW and MSM/TG in Nepal. In addition to focussing  
55  
56 370 on these risk factors, there is a need to improve HTCs to lend psychosocial support or to  
57  
58  
59  
60



1  
2  
3 371 address the need of specific adolescent FSW and MSM/TG or FSW who also inject drugs.  
4  
5 372 Creative behaviour change and communication strategies or interventions to improve skills to  
6  
7 373 tackle physical and sexual abuse should be ensured to overcome the limitations of current  
8  
9 374 programmes for key populations in Nepal.  
10

11 375

### 14 376 **Acknowledgements**

16 377 This research was conducted through the Structured Operational Research and Training  
17  
18 378 Initiative (SORT IT), a global partnership led by the Special Programme for Research and  
19  
20 379 Training in Tropical Diseases at the World Health Organization (WHO/TDR). The training  
21  
22 380 programme, funded by the Department for International Development (DFID), UK, did not  
23  
24 381 fund the research per say. The funders of the training programme had no role in study design,  
25  
26 382 data collection and analysis, decision to publish, or preparation of the manuscript. The model  
27  
28 383 is based on a course developed jointly by the International Union Against Tuberculosis and  
29  
30 384 Lung Disease (The Union) and MédecinssansFrontières (MSF/Doctors Without Borders). The  
31  
32 385 specific SORT IT programme which resulted in this publication was jointly developed and  
33  
34 386 implemented by: The Union South-East Asia Office, New Delhi, India; the Centre for  
35  
36 387 Operational Research, The Union, Paris, France; The Union, Mandalay, Myanmar; the  
37  
38 388 Operational Research Unit (LUXOR), MSF Brussels Operational Center, Luxembourg;  
39  
40 389 Department of Preventive and Social Medicine, Jawaharlal Institute of Postgraduate Medical  
41  
42 390 Education and Research, Puducherry, India; Department of Community Medicine,  
43  
44 391 Government T.D Medical College, Alappuzha, India; College of Life and Environmental  
45  
46 392 Sciences, Exeter University, UK; Velammal Medical College Hospital & Research Institute,  
47  
48 393 Madurai, India; and Institute of Medicine, University of Chester, UK.  
49  
50  
51  
52

53 394  
54  
55  
56  
57  
58  
59  
60

1  
2  
3 395 **Funding:** This research received no specific grant from any funding agency in the public,  
4  
5 396 commercial or not-for-profit sectors.  
6

7 397

8  
9 398 **Competing interest:** None  
10

11 399

12  
13  
14 400 **Contributors:** RS, SP, HDS and KD were involved in conception and design of the study; all  
15  
16 401 authors were involved in analysis and interpretation of data; RS prepared the first draft, and  
17  
18 402 all authors were involved in critically reviewing the draft and approving the final draft for  
19  
20 403 submission.  
21

22  
23 404 **Data availability statement:** Data is available to the corresponding author and will be  
24  
25 405 provided on request.  
26

27 406 **Provenance and peer review:** Not commissioned; externally peer reviewed.  
28

29 407  
30

31  
32 408 REFERENCES  
33

34 409 1 World Health Organization(WHO). HIV factsheet. 2015.  
35

36  
37 410 2 UNAIDS. 90-90-90 An ambitious treatment target to help end the AIDS epidemic.  
38  
39 411 Swizerland: 2014.  
40

41  
42 412 3 World Health Organization. Global update on HIV treatment 2013: Results, impact and  
43  
44 413 opportunities. 2013.  
45

46  
47 414 4 NCASC. Review of the National HIV Surveillance System: Strengthening the HIV  
48  
49 415 Second Generation Surveillance in Nepal. Kathmandu: 2007.  
50

51  
52  
53 416 5 NCASC. National Consolidated Guidelines for Treating and Preventing HIV in Nepal.  
54  
55 417 2014.  
56

57  
58 418 6 Gardner EM, McLees MP, Steiner JF, *et al.* The spectrum of engagement in HIV care  
59  
60

- 1  
2  
3 419 and its relevance to test-and-treat strategies for prevention of HIV infection. *Clin Infect*  
4  
5 420 *Dis* 2011;**52**:793–800. doi:10.1093/cid/ciq243  
6  
7  
8 421 7 Koirala S, Deuba K, Nampaisan O, *et al.* Facilitators and barriers for retention in HIV  
9  
10 422 care between testing and treatment in Asia—A study in Bangladesh, Indonesia, Lao,  
11  
12 423 Nepal, Pakistan, Philippines and Vietnam. 2017;:1–20.  
13  
14 424 doi:10.1371/journal.pone.0176914  
15  
16  
17  
18 425 8 NCASC. Factsheet : HIV Epidemic Update of Nepal , as of December 2015.  
19  
20  
21 426 9 NCASC. Integrated Biological and Behavioral Surveillance ( IBBS ) Survey among  
22  
23 427 Female Sex Workers in 22 Terai Highway Districts of Nepal Round V. 2016.  
24  
25  
26 428 10 NCASC. Integrated Biological and Behavioral Surveillance (IBBS) Survey among  
27  
28 429 Men who have sex with men (MSM) and Transgender (TG) people in Kathmandu  
29  
30 430 Valley, Nepal. Kathmandu: 2012.  
31  
32  
33  
34 431 11 World Health Organization. Preventing HIV/AIDS in young people: A systematic  
35  
36 432 review of the evidence from developing countries. 2006.  
37  
38  
39 433 12 Lightfoot M. HIV prevention for adolescents: where do we go from here? *Am Psychol*  
40  
41 434 2012;**67**:661–71. doi:10.1037/a0029831  
42  
43  
44 435 13 NCASC. Integrated Biological and Behavioral Surveillance Survey (IBBS) among  
45  
46 436 Male Injecting Drug Users (IDUs) in Western to FarWestern Terai of Nepal.  
47  
48 437 Kathmandu: 2012.  
49  
50  
51 438 14 NCASC. Integrated Biological and Behavioral Surveillance (IBBS) Survey among  
52  
53 439 Female Sex Workers in 22 Terai Highway Districts of Nepal. Kathmandu: 2012.  
54  
55  
56  
57 440 15 Deuba K, Anderson S, Ekstrom AM, *et al.* Micro-level social and structural factors act  
58  
59  
60

- 1  
2  
3 441 synergistically to increase HIV risk among Nepalese female sex workers. *Int J Infect*  
4  
5 442 *Dis* 2016;**49**:100–6. doi:10.1016/j.ijid.2016.06.007  
6  
7  
8 443 16 Deuba K, Ekström AM, Shrestha R, *et al.* Psychosocial Health Problems Associated  
9  
10 444 with Increased HIV Risk Behavior among Men Who Have Sex with Men in Nepal: A  
11  
12 445 Cross-Sectional Survey. *PLoS One* 2013;**8**. doi:10.1371/journal.pone.0058099  
13  
14  
15 446 17 Stall R, Mills TC, Williamson J, *et al.* Association of Co-Occurring Psychosocial  
16  
17 447 Health Problems and Increased Vulnerability to HIV/AIDS among Urban Men Who  
18  
19 448 Have Sex with Men. *Am J Public Health* 2003;**93**:939–42. doi:10.2105/AJPH.93.6.939  
20  
21  
22  
23 449 18 Strathdee SA, West BS, Reed E, *et al.* Substance Use and HIV Among Female Sex  
24  
25 450 Workers and Female Prisoners: Risk Environments and Implications for Prevention,  
26  
27 451 Treatment, and Policies. 2015;**69**:1–15.  
28  
29 452 doi:10.1097/QAI.0000000000000624.Substance  
30  
31  
32  
33 453 19 Patel SK, Saggurti N, Pachauri S, *et al.* Correlates of Mental Depression Among  
34  
35 454 Female Sex Workers in Southern India. *Asia-Pacific J public Heal* Published Online  
36  
37 455 First: 2015. doi:10.1177/1010539515601480  
38  
39  
40 456 20 OECD. DAC list of ODA Recipients 2014. 2014. doi:Accessed on 4march 2016  
41  
42  
43 457 21 UNAIDS. Combination HIV Prevention: tailoring and coordinating biomedical,  
44  
45 458 behavioural and structural strategies to reduce new HIV infections. 2010.  
46  
47  
48 459 22 Natamba BK, Achan J, Arbach A, *et al.* Reliability and validity of the center for  
49  
50 460 epidemiologic studies-depression scale in screening for depression among HIV-  
51  
52 461 infected and -uninfected pregnant women attending antenatal services in northern  
53  
54 462 Uganda: a cross-sectional study. *BMC Psychiatry* 2014;**14**:303. doi:10.1186/s12888-  
55  
56 463 014-0303-y  
57  
58  
59  
60

- 1  
2  
3 464 23 Radloff LS. The CES-D Scale: a self-report depression scale for research in the general  
4  
5 465 population. *Appl Psychol Meas* 1977;**1**:385–401. doi:10.1177/014662167700100306  
6  
7  
8 466 24 Vyavaharkar M, Moneyham L, Corwin S, *et al.* Relationships between stigma, social  
9  
10 467 support, and depression in HIV-infected African American women living in the rural  
11  
12 468 Southeastern United States. *NIH-PA* 2011;**21**.  
13  
14 469 doi:10.1016/j.jana.2009.07.008.Relationships  
15  
16  
17  
18 470 25 Yi MS, Mrus JM, Wade TJ, *et al.* Religion, spirituality, and depressive symptoms in  
19  
20 471 patients with HIV/AIDS. *J Gen Intern Med* 2006;**21**:21–7. doi:10.1111/j.1525-  
21  
22 472 1497.2006.00643.x  
23  
24  
25 473 26 Williamson T, Eliasziw M, Fick G. Log-binomial models: exploring failed  
26  
27 474 convergence. *Emerg Themes Epidemiol* 2013;**10**:14. doi:10.1186/1742-7622-10-14  
28  
29  
30 475 27 Barros AJ, Hirkata VN. Alternatives for logistic regression in cross-sectional studies:  
31  
32 476 an empirical comparison of models that directly estimate the prevalence ratio. *BMC*  
33  
34 477 *Med Res Methodol* 2003;**3**:21. doi:10.1186/1471-2288-3-21  
35  
36  
37  
38 478 28 Jha UM, Raj Y, Venkatesh S, *et al.* HIV epidemic among men who have sex with men  
39  
40 479 in India: National scenario of an unfinished agenda. *HIV/AIDS - Res Palliat Care*  
41  
42 480 2014;**6**:159–70. doi:10.2147/HIV.S69708  
43  
44  
45 481 29 Li R, Pan X, Ma Q, *et al.* Prevalence of prior HIV testing and associated factors among  
46  
47 482 MSM in Zhejiang Province, China: a cross-sectional study. *BMC Public Health*  
48  
49 483 2016;**16**:1152. doi:10.1186/s12889-016-3806-2  
50  
51  
52  
53 484 30 Dandona R, Dandona L, Kumar a G, *et al.* HIV testing among female sex workers in  
54  
55 485 Andhra Pradesh, India. *Aids* 2005;:2031–41.  
56  
57  
58  
59  
60

- 1  
2  
3 486 31 Vutthikraivit P, Lertnimitr B, Chalardsakul P, *et al.* Prevalence of HIV testing and  
4 associated factors among young men who have sex with men (MSM) in Bangkok,  
5 487  
6 Thailand. *J Med Assoc Thai* 2014;**97 Suppl 2**:S207–14.  
7 488  
8  
9  
10 489 32 Ganju D, Ramesh S, Saggurti N. Factors associated with HIV testing among male  
11 injecting drug users: findings from a cross-sectional behavioural and biological survey  
12 490  
13 in Manipur and Nagaland, India. *Harm Reduct J* 2016;**13**:21. doi:10.1186/s12954-016-  
14 491  
15 0110-5  
16 492  
17  
18  
19  
20 493 33 Suthar AB, Ford N, Bachanas PJ, *et al.* Towards Universal Voluntary HIV Testing and  
21 Counselling: A Systematic Review and Meta-Analysis of Community-Based  
22 494  
23 Approaches. *PLoS Med* 2013;**10**. doi:10.1371/journal.pmed.1001496  
24 495  
25  
26  
27 496 34 Saito T, Sadoshima J. High prevalence of forced sex among non-brothel based, wine  
28 shop centered sex workers in Chennai, India. 2016;**116**:1477–90.  
29 497  
30 doi:10.1161/CIRCRESAHA.116.303790.The  
31 498  
32  
33  
34  
35 499 35 Sherwood JA, Grosso A, Decker MR, *et al.* Sexual violence against female sex workers  
36 in The Gambia: a cross-sectional examination of the associations between victimization  
37 500  
38 and reproductive, sexual and mental health. *BMC Public Health* 2015;**15**:270.  
39 501  
40 doi:10.1186/s12889-015-1583-y  
41 502  
42  
43  
44 503 36 Sagtani RA, Bhattarai S, Adhikari BR, *et al.* Violence, HIV risk behaviour and  
45 depression among female sex workers of eastern Nepal. *BMJ Open* 2013;**3**:e002763.  
46 504  
47 doi:10.1136/bmjopen-2013-002763  
48 505  
49  
50  
51  
52 506 37 Yan H, Zhang R, Wei C, *et al.* A peer-led , community-based rapid HIV testing  
53 intervention among untested men who have sex with men in China : an operational  
54 507  
55 model for expansion of HIV testing and linkage to care. *Sex Transm Infect* 2014;:388–  
56 508  
57  
58  
59  
60

- 1  
2  
3 509 93. doi:10.1136/sextrans-2013-051397  
4  
5  
6 510 38 Tran BX, Nguyen LT, Nguyen NP, *et al.* HIV voluntary testing and perceived risk  
7  
8 511 among female sex workers in the mekong delta region of vietnam. *Glob Health Action*  
9  
10 512 2013;**6**:1–7. doi:10.3402/gha.v6i0.20690  
11  
12  
13 513 39 Deuba K, Ojha B, Shrestha R, *et al.* Optimizing the implementation of integrated  
14  
15 514 biological and behavioural surveillance surveys of HIV in resource limited settings-  
16  
17 515 lessons from Nepal. *Asian Pacific J Trop Dis* 2014;**4**:S605–15. doi:10.1016/S2222-  
18  
19 516 1808(14)60688-5  
20  
21  
22  
23 517 40 von Elm E, Altman DG, Egger M, *et al.* The Strengthening the Reporting of  
24  
25 518 Observational Studies in Epidemiology (STROBE) Statement: Guidelines for reporting  
26  
27 519 observational studies. *Lancet* 2007;**370**:1453–7. doi:10.1016/j.ijisu.2014.07.013  
28  
29

30 **Licence statement**

31  
32  
33 521 The Corresponding Author has the right to grant on behalf of all authors and does grant on  
34  
35 522 behalf of all authors, an exclusive licence (or non-exclusive for government employees) on a  
36  
37 523 worldwide basis to the BMJ and co-owners or contracting owning societies (where published  
38  
39 524 by the BMJ on their behalf), and its Licensees to permit this article (if accepted) to be  
40  
41 525 published in Sexually Transmitted Infections and any other BMJ products and to exploit all  
42  
43 526 subsidiary rights, as set out in our licence.  
44  
45  
46  
47  
48  
49  
50  
51  
52  
53  
54  
55  
56  
57  
58  
59  
60

1  
2  
3 531 **Figure Legend**  
4

5  
6 532 **Figure 1.**Study districts included in Integrated Biological and Behavioural Surveillance  
7

8 533 (IBBS) survey 2012, Nepal.  
9

10  
11 534 Figure footnote  
12

13  
14 535 *\*MSM/TG – Men who have sex with men/transgender, PWID – people who inject drugs, FSW*  
15

16 536 *– female sex workers; KTM valley- Kathmandu valley*  
17

18  
19 537 Web-only figure 1. Convergence plot for the outcome of interest.  
20

21 538  
22

23 539  
24

25 540  
26

27  
28 541  
29  
30  
31  
32  
33  
34  
35  
36  
37  
38  
39  
40  
41  
42  
43  
44  
45  
46  
47  
48  
49  
50  
51  
52  
53  
54  
55  
56  
57  
58  
59  
60



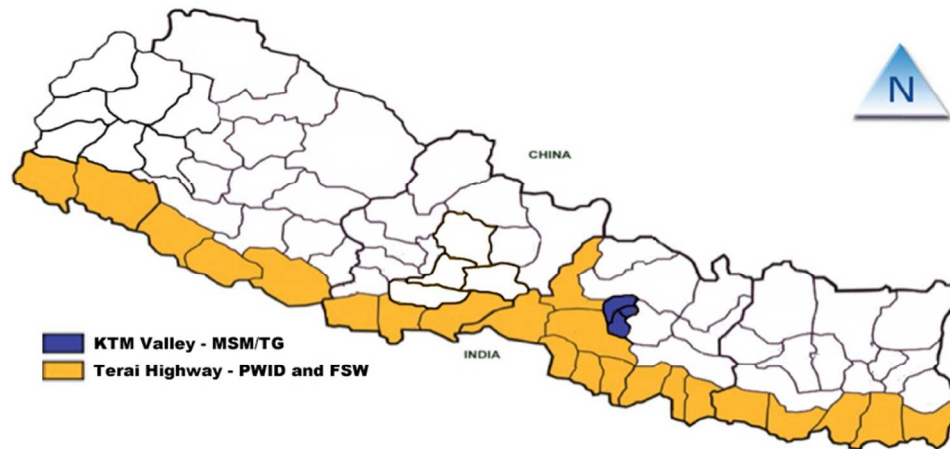

Figure 1. Study districts included in Integrated Biological and Behavioural Surveillance (IBBS) survey 2012, Nepal. Figure footnote \*MSM/TG – Men who have sex with men/transgender, PWID – people who inject drugs, FSW – female sex workers

1  
2  
3  
4  
5  
6  
7  
8  
9  
10  
11  
12  
13  
14  
15  
16  
17  
18  
19  
20  
21  
22  
23  
24  
25  
26  
27  
28  
29  
30  
31  
32  
33  
34  
35  
36  
37  
38  
39  
40  
41  
42  
43  
44  
45  
46  
47  
48  
49  
50  
51  
52  
53  
54  
55  
56  
57  
58  
59  
60

Convergence plot of cdependent=yes

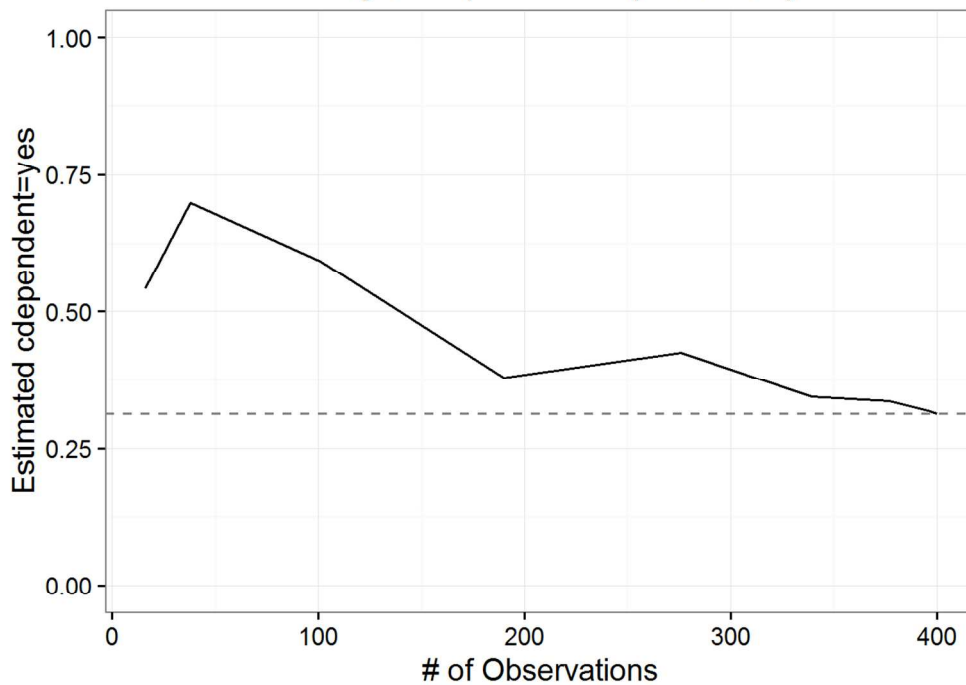

view only

**Web-only table 1.** Prevalence of demographic, psychosocial and structural factors among FSW, IBBS 2012 Nepal.

| Factors                               | FSW<br>N (%) |
|---------------------------------------|--------------|
| <b>Total</b>                          | 610 (100)    |
| HIV prevalence                        | 6 (1)        |
| <b>Demographic</b>                    |              |
| Age in years                          |              |
| 16-19                                 | 85 (14)      |
| 20-24                                 | 130 (21)     |
| ≥25                                   | 395(65)      |
| Illiterate                            | 196(32)      |
| Married                               | 360(59)      |
| <b>Behavioural</b>                    |              |
| Use of condom with most recent client | 461(75)      |
| Consistent condom use                 | 236(59)      |
| <b>Structural</b>                     |              |
| Having dependents in family           | 341(56)      |
| Own home                              | 311(51)      |
| Forced sex in last one year           | 125(20)      |
| Knowledge regarding confidential HTC  | 397(65)      |
| Participated in discussion in HIV     | 84(29)       |
| Participated in HIV awareness program | 169(28)      |
| Participated in AIDS day              | 238(39)      |
| Participated in Condom Day            | 207(34)      |
| Participated in Workshop for HIV      | 110(18)      |
| Received demonstration on Condon Use  | 61(10)       |
| Comprehensive Knowledge on condom     | 122(20)      |
| <b>Psychosocial</b>                   |              |
| Stigma                                | 295(48)      |
| Suicidal thought                      | 210(34)      |
| Distressed / Depressed                | 268 (44)     |
| SSQS <sup>^</sup>                     |              |
| Satisfied                             | 530(87)      |
| Dissatisfied                          | 80(3)        |

\*MSM/TG – Men who have sex with men/transgender, FSW – female sex workers, HIV- Human Immunodeficiency Virus., AIDS- Acquired immune deficiency syndrome, HTC-HIV Testing and Counselling, ^SSQS- The Social Support Questionnaire Score.

**Web-only table 2.** Prevalence of demographic, psychosocial and structural factors among MSM/TG, IBBS 2012 Nepal.

| <b>Factors</b>                                | <b>MSM/TG*<br/>Frequency<br/>(%)</b> | <b>MSM/TG<br/>RDS Adjusted<br/>(CI)</b> |
|-----------------------------------------------|--------------------------------------|-----------------------------------------|
| <b>Total</b>                                  | 400 (100)                            |                                         |
| HIV prevalence                                |                                      | 3.3 (1.9-5.9)                           |
| HTC not utilized                              | 221(55)                              | 68.6 (54.3-80.1)                        |
| <b>Demographic</b>                            |                                      |                                         |
| Age in years                                  |                                      |                                         |
| 16-19                                         | 69 (17)                              | 17.7(11.5-26.1)                         |
| 20-24                                         | 129 (32)                             | 31.3(22.5-41.8)                         |
| ≥25                                           | 202 (51)                             | 51.0(39.2-62.5)                         |
| Illiterate                                    | 13(3)                                | 3.1(1.2-7.9)                            |
| Married                                       | 111(28)                              | 23.3(16.2-32.2)                         |
| <b>Behavioural</b>                            |                                      |                                         |
| Condom use in last sex                        | 339(85)                              | 75.8(64.8-84.2)                         |
| Drinking Alcohol                              | 323(81)                              | 81.0(71.3-88.1)                         |
| <b>Structural</b>                             |                                      |                                         |
| Ever Participated in HIV awareness programs   | 185(46)                              | 35.6(23.9-49.2)                         |
| Physical assault in last year                 | 57(14)                               | 6.3(3.6-10.8)                           |
| Housing instability                           |                                      |                                         |
| Own Home                                      | 75(19)                               | 19.9(12.4-30.3)                         |
| Forced sex in last year                       | 52(13)                               | 5.5(3.3-9.1)                            |
| Discrimination in Job                         | 79(20)                               | 5.9(3.9-8.8)                            |
| <b>Psychosocial</b>                           |                                      |                                         |
| Stigma                                        | 253(63)                              | 63.2(52.0-73.2)                         |
| Suicidal thought                              | 107(27)                              | 14.2(9.8-20.1)                          |
| Depression                                    |                                      |                                         |
| Distressed                                    | 83(21)                               | 14.9(10.3-21.1)                         |
| Depressed                                     | 97(24)                               | 18.2(11.9-26.7)                         |
| SSQS^                                         |                                      |                                         |
| Satisfied                                     | 390(97)                              | 98.5(96.1-99.4)                         |
| Dissatisfied                                  | 10(3)                                | 1.5(0.5-3.8)                            |
| <b>Number of seed</b>                         | 8                                    |                                         |
| <b>Maximum no. of recruitment wave (mean)</b> | 8 (3.67)                             |                                         |

---

1  
2  
3  
4  
5 \*MSM/TG – Men who have sex with men/transgender, HIV- Human Immunodeficiency Virus., AIDS-  
6 Acquired immune deficiency syndrome, HTC-HIV Testing and Counselling, ^SSQS- The Social Support  
7 Questionnaire Score.  
8  
9  
10  
11  
12  
13  
14  
15  
16  
17  
18  
19  
20  
21  
22  
23  
24  
25  
26  
27  
28  
29  
30  
31  
32  
33  
34  
35  
36  
37  
38  
39  
40  
41  
42  
43  
44  
45  
46  
47  
48  
49  
50  
51  
52  
53  
54  
55  
56  
57  
58  
59  
60

1  
2  
3 Web-only box 1. Independent variables used in this study from the IBBS 2012 survey among  
4 FSW and MSM/TG to determine Uptake of HTC, Nepal.  
5  
6  
7

8 **Demographic Factors:** Age, Educational Status, Marital Status, Having dependent  
9

10 **Behavioural Factors:** Condom Use last sex, Ever inject drug, Drinking alcohol  
11  
12

13 **Psychosocial Factors:**

- 14 ✓ Among FSW: Stigma towards HIV, Suicidal thoughts Ever, Depression, The Social  
15 Support Questionnaire Score (SSQS)  
16
- 17 ✓ Among MSM/TG: Stigma towards HIV, Suicidal thoughts Ever, Depression, The  
18 Social Support Questionnaire Score (SSQS)  
19  
20  
21  
22  
23

24 **Structural Factors:**

- 25 ✓ Among FSW: Housing Instability, Experienced forced sex in last year, Ever  
26 participated in HIV programs, Police detention in last 6 months, Physical assault last  
27 year, Client refusal to pay after sex in last year  
28
- 29 ✓ Among MSM/TG: Housing Instability, Ever participated in HIV programs, Physical  
30 assault last year, Experienced forced sex in last year, Discrimination in Job  
31  
32  
33  
34  
35  
36  
37  
38  
39  
40  
41  
42  
43  
44  
45  
46  
47  
48  
49  
50  
51  
52  
53  
54  
55  
56  
57  
58  
59  
60

## STROBE Statement—checklist of items that should be included in reports of observational studies

|                      | Item No | Recommendation                                                                                                                                                                                                                                                                                                                                                                                                                                                         | Current paper                                                                                                                             |
|----------------------|---------|------------------------------------------------------------------------------------------------------------------------------------------------------------------------------------------------------------------------------------------------------------------------------------------------------------------------------------------------------------------------------------------------------------------------------------------------------------------------|-------------------------------------------------------------------------------------------------------------------------------------------|
| Title and abstract   | 1       | (a) Indicate the study's design with a commonly used term in the title or the abstract                                                                                                                                                                                                                                                                                                                                                                                 | Done. In abstract. Line 26                                                                                                                |
|                      |         | (b) Provide in the abstract an informative and balanced summary of what was done and what was found                                                                                                                                                                                                                                                                                                                                                                    | Done. Line 23-44                                                                                                                          |
| <b>Introduction</b>  |         |                                                                                                                                                                                                                                                                                                                                                                                                                                                                        |                                                                                                                                           |
| Background/rationale | 2       | Explain the scientific background and rationale for the investigation being reported                                                                                                                                                                                                                                                                                                                                                                                   | Done. Line 64-94                                                                                                                          |
| Objectives           | 3       | State specific objectives, including any pre-specified hypotheses                                                                                                                                                                                                                                                                                                                                                                                                      | Done. Line 95-97. There was no pre-specified hypothesis. We wanted to explore the risk factors for non-utilization of HIV testing centre. |
| <b>Methods</b>       |         |                                                                                                                                                                                                                                                                                                                                                                                                                                                                        |                                                                                                                                           |
| Study design         | 4       | Present key elements of study design early in the paper                                                                                                                                                                                                                                                                                                                                                                                                                | Done. Line 109-111                                                                                                                        |
| Setting              | 5       | Describe the setting, locations, and relevant dates, including periods of recruitment, exposure, follow-up, and data collection                                                                                                                                                                                                                                                                                                                                        | Done. Line 112-138                                                                                                                        |
| Participants         | 6       | (a) <i>Cohort study</i> —Give the eligibility criteria, and the sources and methods of selection of participants. Describe methods of follow-up<br><i>Case-control study</i> —Give the eligibility criteria, and the sources and methods of case ascertainment and control selection. Give the rationale for the choice of cases and controls<br><i>Cross-sectional study</i> —Give the eligibility criteria, and the sources and methods of selection of participants | Done. Line 139-158 (cross-sectional analytic study)                                                                                       |
|                      |         | (b) <i>Cohort study</i> —For matched studies, give matching criteria and number of exposed and unexposed<br><i>Case-control study</i> —For matched studies, give matching criteria and the number of controls per case                                                                                                                                                                                                                                                 |                                                                                                                                           |
| Variables            | 7       | Clearly define all outcomes, exposures, predictors, potential confounders, and effect modifiers. Give diagnostic criteria, if applicable                                                                                                                                                                                                                                                                                                                               | Done. Line 157-172                                                                                                                        |

|                                                                                                                |                              |    |                                                                                                                                                                                                                                                                                                                                                                                                                                                                                                                          |                                                                           |
|----------------------------------------------------------------------------------------------------------------|------------------------------|----|--------------------------------------------------------------------------------------------------------------------------------------------------------------------------------------------------------------------------------------------------------------------------------------------------------------------------------------------------------------------------------------------------------------------------------------------------------------------------------------------------------------------------|---------------------------------------------------------------------------|
| 1<br>2<br>3<br>4<br>5<br>6<br>7                                                                                | Data sources/<br>measurement | 8* | For each variable of interest, give sources of data and details of methods of assessment (measurement). Describe comparability of assessment methods if there is more than one group                                                                                                                                                                                                                                                                                                                                     | Done. Line 110-111 and 157-171. Comparability described in lines 183-190. |
| 8<br>9                                                                                                         | Bias                         | 9  | Describe any efforts to address potential sources of bias                                                                                                                                                                                                                                                                                                                                                                                                                                                                | Lines 183-190                                                             |
| 10                                                                                                             | Study size                   | 10 | Explain how the study size was arrived at                                                                                                                                                                                                                                                                                                                                                                                                                                                                                | Line 139-156                                                              |
| 11<br>12<br>13<br>14<br>15                                                                                     | Quantitative variables       | 11 | Explain how quantitative variables were handled in the analyses. If applicable, describe which groupings were chosen and why                                                                                                                                                                                                                                                                                                                                                                                             | Lines 173-190                                                             |
| 16<br>17<br>18<br>19<br>20<br>21<br>22<br>23<br>24<br>25<br>26<br>27<br>28<br>29<br>30<br>31<br>32<br>33<br>34 | Statistical methods          | 12 | (a) Describe all statistical methods, including those used to control for confounding<br>(b) Describe any methods used to examine subgroups and interactions<br>(c) Explain how missing data were addressed<br>(d) <i>Cohort study</i> —If applicable, explain how loss to follow-up was addressed<br><i>Case-control study</i> —If applicable, explain how matching of cases and controls was addressed<br><i>Cross-sectional study</i> —If applicable, describe analytical methods taking account of sampling strategy | Done. Line 173-190.<br>Lines 183-190.<br>Not applicable.<br>Lines 178-182 |
| 35                                                                                                             |                              |    | (e) Describe any sensitivity analyses                                                                                                                                                                                                                                                                                                                                                                                                                                                                                    | Not applicable.                                                           |

Continued on next page



| <b>Results</b>    |     |                                                                                                                                                                                                                                                                                                                                                                                                               |                                                         |
|-------------------|-----|---------------------------------------------------------------------------------------------------------------------------------------------------------------------------------------------------------------------------------------------------------------------------------------------------------------------------------------------------------------------------------------------------------------|---------------------------------------------------------|
| Participants      | 13* | (a) Report numbers of individuals at each stage of study—eg numbers potentially eligible, examined for eligibility, confirmed eligible, included in the study, completing follow-up, and analysed<br>(b) Give reasons for non-participation at each stage<br>(c) Consider use of a flow diagram                                                                                                               | Line 203-204<br>Not applicable<br>Not applicable        |
| Descriptive data  | 14* | (a) Give characteristics of study participants (eg demographic, clinical, social) and information on exposures and potential confounders<br>(b) Indicate number of participants with missing data for each variable of interest<br>(c) <i>Cohort study</i> —Summarise follow-up time (eg, average and total amount)                                                                                           | Done. Line 204-207<br>No missing data<br>Not applicable |
| Outcome data      | 15* | <i>Cohort study</i> —Report numbers of outcome events or summary measures over time<br><i>Case-control study</i> —Report numbers in each exposure category, or summary measures of exposure<br><i>Cross-sectional study</i> —Report numbers of outcome events or summary measures                                                                                                                             | Done. 205-206                                           |
| Main results      | 16  | (a) Give unadjusted estimates and, if applicable, confounder-adjusted estimates and their precision (eg, 95% confidence interval). Make clear which confounders were adjusted for and why they were included<br>(b) Report category boundaries when continuous variables were categorized<br>(c) If relevant, consider translating estimates of relative risk into absolute risk for a meaningful time period | Lines 209-214<br>Lines 162-166<br>Not applicable        |
| Other analyses    | 17  | Report other analyses done—eg analyses of subgroups and interactions, and sensitivity analyses                                                                                                                                                                                                                                                                                                                | Not applicable                                          |
| <b>Discussion</b> |     |                                                                                                                                                                                                                                                                                                                                                                                                               |                                                         |
| Key results       | 18  | Summarise key results with reference to study objectives                                                                                                                                                                                                                                                                                                                                                      | Done. Line 239-248                                      |
| Limitations       | 19  | Discuss limitations of the study, taking into account sources of potential bias or imprecision. Discuss both direction and magnitude of any potential bias                                                                                                                                                                                                                                                    | Done. Line 300-306                                      |
| Interpretation    | 20  | Give a cautious overall interpretation of                                                                                                                                                                                                                                                                                                                                                                     | Done. Line 309-312                                      |

1  
2 results considering objectives, limitations,  
3 multiplicity of analyses, results from similar  
4 studies, and other relevant evidence

---

|                  |    |                                                                       |                    |
|------------------|----|-----------------------------------------------------------------------|--------------------|
| 5                | 6  | 7                                                                     | 8                  |
| Generalisability | 21 | Discuss the generalisability (external validity) of the study results | Done. Line 299-300 |

---

#### 9 **Other information**

---

|         |    |                                                                                                                                                               |                    |    |
|---------|----|---------------------------------------------------------------------------------------------------------------------------------------------------------------|--------------------|----|
| 10      | 11 | 12                                                                                                                                                            | 13                 | 14 |
| Funding | 22 | Give the source of funding and the role of the funders for the present study and, if applicable, for the original study on which the present article is based | Done. Line 315-333 |    |

15  
16 \*Give information separately for cases and controls in case-control studies and, if applicable, for exposed and  
17 unexposed groups in cohort and cross-sectional studies.

18  
19 **Note:** An Explanation and Elaboration article discusses each checklist item and gives methodological background and  
20 published examples of transparent reporting. The STROBE checklist is best used in conjunction with this article (freely  
21 available on the Web sites of PLoS Medicine at <http://www.plosmedicine.org/>, Annals of Internal Medicine at  
22 <http://www.annals.org/>, and Epidemiology at <http://www.epidem.com/>). Information on the STROBE Initiative is  
23 available at [www.strobe-statement.org](http://www.strobe-statement.org).  
24  
25  
26  
27  
28  
29  
30  
31  
32  
33  
34  
35  
36  
37  
38  
39  
40  
41  
42  
43  
44  
45  
46  
47  
48  
49  
50  
51  
52  
53  
54  
55  
56  
57  
58  
59  
60

# BMJ Open

## Why don't key populations access HIV testing and counselling centres in Nepal? Findings based on national surveillance survey

|                                 |                                                                                                                                                                                                                                                                                                                                                                                                                                                                                                                |
|---------------------------------|----------------------------------------------------------------------------------------------------------------------------------------------------------------------------------------------------------------------------------------------------------------------------------------------------------------------------------------------------------------------------------------------------------------------------------------------------------------------------------------------------------------|
| Journal:                        | <i>BMJ Open</i>                                                                                                                                                                                                                                                                                                                                                                                                                                                                                                |
| Manuscript ID                   | bmjopen-2017-017408.R2                                                                                                                                                                                                                                                                                                                                                                                                                                                                                         |
| Article Type:                   | Research                                                                                                                                                                                                                                                                                                                                                                                                                                                                                                       |
| Date Submitted by the Author:   | 16-Aug-2017                                                                                                                                                                                                                                                                                                                                                                                                                                                                                                    |
| Complete List of Authors:       | Shrestha, Rachana; Public Health and Environment Research Center Philip, Sairu; Government T.D Medical College, Alappuzha, Kerala, India, Community Medicine<br>Shewade, Hemant; International Union Against Tuberculosis and Lung Disease, South-East Asia Regional Office, Operational Research<br>Rawal, Bir; National Centre for AIDS & STD Control, Ministry of Health<br>Deuba, Keshab; Public Health and Environment Research Center, ;<br>Karolinska Institutet , Department of Public Health Sciences |
| <b>Primary Subject Heading</b>: | Public health                                                                                                                                                                                                                                                                                                                                                                                                                                                                                                  |
| Secondary Subject Heading:      | HIV/AIDS, Public health                                                                                                                                                                                                                                                                                                                                                                                                                                                                                        |
| Keywords:                       | HTC, MSM/TG, FSW, Nepal                                                                                                                                                                                                                                                                                                                                                                                                                                                                                        |
|                                 |                                                                                                                                                                                                                                                                                                                                                                                                                                                                                                                |

SCHOLARONE™  
Manuscripts

Only

1  
2  
3 1 **Why don't key populations access HIV testing and counselling centres in**  
4  
5 2 **Nepal? Findings based on national surveillance survey**  
6  
7

8  
9 3 **Authors:** Rachana Shrestha<sup>1\*</sup>, Sairu Philip<sup>2</sup>, Hemant Deepak Shewade<sup>3</sup>, Bir Rawal<sup>4</sup>, Keshab  
10 4 Deuba<sup>5</sup>  
11

12  
13  
14 5 **Affiliations:**<sup>1</sup>Public Health and Environment Research Center, Kathmandu Nepal,  
15  
16 <sup>2</sup>Government T.D Medical College, Alappuzha, Kerala, India, <sup>3</sup>International Union Against  
17 6 Tuberculosis and Lung Disease (The Union), South-East Asia Office, New Delhi,  
18 7 India, <sup>4</sup>National Centre for AIDS and STD Control (NCASC), Ministry of Health, Kathmandu,  
19 8 Nepal, <sup>5</sup>Department of Public Health Sciences, Karolinska Institutet, Stockholm, Sweden.  
20  
21  
22  
23  
24  
25  
26  
27  
28

29 11 \*Authors responsible for the correspondence: Rachana Shrestha, Public Health and  
30 12 Environment Research Center (PERC), Sanepa Lalitpur Nepal-44600  
31  
32  
33 13 Web: <http://percnepal.org/home/index> Tel: +977 9860999428;  
34  
35 14 Email: [rachana.shrestha@percnepal.org](mailto:rachana.shrestha@percnepal.org)  
36  
37  
38  
39

40 16 **Running title:** IBBS 2012Nepal: factors for non-utilization of HTC  
41  
42

43 17 **Word count:** Abstract -246; Main text - 2577; Tables – 2; Figure – 1; Web-only table – 1;  
44 18 Web-only table – 2; Web-only table – 3; Web-only box - 1  
45  
46  
47

48 19 **Keywords:** Key populations; HIV voluntary testing and counselling; MSM;  
49 20 Transgender;FSW; SORT IT; Nepal  
50  
51  
52  
53  
54  
55  
56  
57  
58  
59  
60

1  
2  
3 23 **ABSTRACT**  
4  
5

6 24 **Objectives:** To assess the demographic, behavioural, psychosocial and structural factors  
7  
8 25 associated with non-utilization of HIV testing and counselling centres (HTC) by female sex  
9  
10 26 workers (FSW) and men who have sex with men/ transgender (MSM/TG).

11  
12 27 **Methods:** This study involved a cross-sectional design. We used the national surveillance  
13  
14 28 survey data of 2012 which included 610 FSW and 400 MSM/TG recruited randomly from 22  
15  
16 29 and three districts of Nepal respectively. Adjusted prevalence ratio (aPR) and 0.95 confidence  
17  
18 30 interval (CI) using modified Poisson regression was used to assess and infer the association  
19  
20 31 between outcome (non-utilization of HTC in last year) and independent variables.  
21  
22

23 32 **Results:** Non-utilization of HTC in last one year was 54% for FSW and 55% for MSM/TG.  
24  
25 33 The significant factors for non-utilization of HTC among FSW were:  
26  
27 34 depression [aPR=1.4(1.1-1.6)], injectable drug abuse (ever) [aPR=1.4(1.1-1.8)], participation  
28  
29 35 (ever) in HIV awareness programmes [aPR=1.2 (1.0-1.4)], experience of forced sex in  
30  
31 36 previous year [aPR=1.1 (1.0-1.3)] and absence of dependents in the family [aPR=1.1(1.0-  
32  
33 37 1.3)]. Non-utilisation of HTC among MSM/TG had significant association with age 16-19  
34  
35 38 years [aPR=1.4(1.1-1.7)], non-condom use [aPR=1.2 (1.0-1.4)], participation (ever) in HIV  
36  
37 39 awareness programs [aPR=1.6 (1.3-2.0)], physical assault in previous year [aPR=1.8(1.0-  
38  
39 40 3.1)], experience of forced sex in previous year [aPR=0.5(0.3-0.9)]  
40  
41  
42  
43

44 41 **Conclusion:** Although limited by cross-sectional design, we found many programmatically  
45  
46 42 relevant findings. Creative strategies should be envisaged for effective behavioural change  
47  
48 43 communication to improve access to HIV testing. Psychosocial and structural interventions  
49  
50 44 should be integrated with HIV prevention programmes to support key populations in  
51  
52 45 accessing HIV testing.  
53  
54

55  
56 46  
57  
58  
59  
60

1  
2  
3 47  
4  
5  
6 48  
7  
8  
9  
10 49  
11  
12  
13 50  
14  
15  
16 51  
17  
18  
19  
20 52  
21  
22  
23 53  
24  
25  
26 54  
27  
28  
29  
30 55  
31  
32  
33 56  
34  
35  
36 57  
37  
38  
39  
40 58  
41  
42  
43 59  
44  
45  
46 60  
47  
48  
49  
50 61  
51  
52  
53 62  
54  
55  
56  
57 63  
58  
59  
60

### **Summary – strengths and limitations of this study**

1. Psychosocial and structural factors were assessed for the first time in the national surveillance survey of 2012.
2. This is the first study to explore the relation of psychosocial and structural factors with HTC non-utilization among FSW and MSM/TG in Nepal.
3. Social desirability bias, recall bias due to the assessment of past exposures might have influenced the self-reported variables.

## 64 INTRODUCTION

65 Globally, at the end of 2015, an estimated 36.7 million people were living with HIV of  
66 which 47% did not know their HIV status and hence were deprived of antiretroviral therapy  
67 and care[1]. According to UNAIDS 90-90-90 target, by 2020, 90% of all individuals living  
68 with HIV should know their HIV status, 90% of all individuals with diagnosed HIV infection  
69 should receive sustained antiretroviral therapy, and 90% of all individuals receiving  
70 antiretroviral therapy should have viral suppression. By 2030 the AIDS epidemic will come to  
71 an end as public health threat if these three targets are achieved[2].

72 The key population are those who have a high risk of acquiring or transmitting HIV.  
73 Global studies have shown that key populations are 13 to 22 times more likely to be infected  
74 with HIV than the general population[3]. Key population includes female sex workers (FSW)  
75 and men who have sex with men (MSM)/ transgender (TG)[4]. FSW and MSM/TG are 13-14  
76 times more likely to be infected with HIV than the general population[3].

77 World Health Organization (WHO) recommended integrated biological and  
78 behavioural surveillance (IBBS) survey to monitor HIV prevalence and risk behaviours  
79 among key populations. In the late 90s, IBBS was started by Government of Nepal as part of  
80 response plan against HIV/AIDS epidemic[5]. HIV testing and counselling (HTC) is the entry  
81 point for HIV care services in Nepal and are provided free of cost to all. HTC is a critical  
82 intervention in achieving the first 90, i.e., people living with HIV should know their HIV  
83 status. Though the first step is crucial in identifying people living with HIV, the retention in  
84 care of PLHIV in second 90 and third 90 is equally necessary to maximise the treatment and  
85 prevention benefits of antiretroviral therapy[6,7]. National consolidated guidelines for  
86 preventing and treating HIV in Nepal had recommended various approaches for maximising  
87 HIV testing in both facility and community-based settings[4,5]. Different surveillance surveys

1  
2  
3 88 conducted in Nepal found that the non-utilization of HTC was low, i.e., around 50%in FSW  
4  
5 89 and MSM/TG[8].  
6  
7

8 90 There was a substantial decline in the proportion of FSW visiting HTC in 2016  
9  
10 91 compared to 2012 as revealed by IBBS 2016 [9]. Among FSW, decreasing trend in HIV  
11  
12 92 prevalence was accompanied by an increasing trend in lack of comprehensive knowledge  
13  
14 93 regarding HIV [9,10]. The UNAIDS target of 90% assessment of HIV status by 2020 might  
15  
16 94 not be reached in Nepal unless factors associated with non-utilization of HTC are identified  
17  
18 95 and addressed [2,11,12].  
19  
20  
21

22 96 Psychosocial variables like distress/ depression were included only in IBBS 2012  
23  
24 97 survey and were found to be high(40-50 percent) of the key population (people who inject  
25  
26 98 drugs, FSW and MSM/TG) studied[10,13,14].Different studies demonstrate that the  
27  
28 99 psychosocial problems (depression, drug abuse and suicidality) increase the likelihood of  
29  
30 100 HIV-related risk behaviours among FSW and MSM/TG in Nepal [15,16]. Studies conducted  
31  
32 101 outside of Nepal (India and USA) among key populations (MSM/TG and FSW) found that the  
33  
34 102 psychosocial (depression, substance abuse, violence) and structural factors not only increase  
35  
36 103 their risk behaviours but also lowers the uptake of behavioural interventions.[17–19]. The  
37  
38 104 identification of effects of psychosocial and structural factors in the uptake of HTC would  
39  
40 105 help us to improve existing challenges of reaching key populations in Nepal. However such  
41  
42 106 evidence is very limited in Nepal. Therefore using the IBBS 2012 data, we aimed to  
43  
44 107 determine the demographic, behavioural, psychosocial and structural risk factors associated  
45  
46 108 with non-utilization of HTC in last one-year by FSW and MSM/TG in Nepal.  
47  
48  
49  
50  
51

52 109  
53  
54

55 110  
56  
57

58 111  
59  
60



1  
2  
3 112 **METHODS**  
4  
5

6 113 **Study design**  
7

8  
9 114 This study was a cross-sectional study involving secondary data of FSW and MSM/TG  
10  
11 115 collected from IBBS survey of 2012 in Nepal.  
12

13  
14 116 **Setting**  
15

16  
17 117 Nepal, with a population of 27 million, is a low-middle income, a beautiful landlocked  
18  
19 118 country in South-East Asia[20]. It shares borders with China in the north and India to the  
20  
21 119 south, east and west. Nepal is divided into 75 districts and consists of a Himalayan  
22  
23 120 mountainous region in the north and open terrain (*Terai* in local language) in the south. HTC  
24  
25 121 service was first started in Nepal in 1995 by the National Programme for AIDS and Sexually  
26  
27 122 Transmitted Disease. There are over 235 HTC service sites in Nepal as of July 2016.  
28  
29

30 123 *HTC in Nepal*  
31

32  
33 124 In Nepal, HTC is the entry point for HIV prevention services whose primary aim is to  
34  
35 125 identify people living with HIV and link them to treatment. It is voluntary and provided free  
36  
37 126 of cost. Health facilitators should maintain confidentiality and obtain informed consent during  
38  
39 127 pre and post-test counselling. According to national guidelines, key populations are expected  
40  
41 128 to visit HTC in every 6-12 months[5]. Besides that, community-based interventions are also  
42  
43 129 prioritised in which peer educators and outreach workers are mobilised in the community.  
44  
45 130 Peer educators are volunteers who convey crucial information (proper condom use, HIV  
46  
47 131 testing, etc.) to key populations in informal (cruising areas like bus park or public park) and  
48  
49 132 formal setting (drop-in centres). They also distribute condoms, safe needles/ syringes or aware  
50  
51 133 them about available treatment, care and support services.  
52  
53

54  
55  
56 134  
57  
58  
59  
60

1  
2  
3 135 *IBBS 2012 Survey, Nepal*

4  
5  
6 136 National Centre for AIDS and STD Control (NCASC), Nepal, conducted two separate  
7  
8 137 cross-sectional IBBS surveys between September and November 2012 for FSW and  
9  
10 138 MSM/TG respectively. FSW were defined as “*women aged 16 years and above reporting to*  
11  
12 139 *have been paid in cash or kind for sex with a male within the last six months.*” MSM/TG were  
13  
14 140 defined as “*men aged 16 years or above who have had sexual relations (either oral or anal)*  
15  
16 141 *with another male in the 12 months preceding the survey.*”(7). A survey among FSW was  
17  
18 142 conducted in 22 *Terai* highway districts and for MSM/TG in three districts of Kathmandu  
19  
20 143 valley (Kathmandu, Lalitpur and Bhaktapur) (**figure 1**).

#### 21 22 23 24 144 **Study population and sampling**

25  
26  
27 145 The FSW were recruited using two-stage cluster sampling; stage 1 was the selection of  
28  
29 146 clusters, and stage 2 was the random selection of an equal number of participants from each  
30  
31 147 selected cluster to ensure a self-weighted sample. A cluster was defined as having at least 30  
32  
33 148 sex workers in that area; those with fewer than 30 sex workers were merged with nearby  
34  
35 149 locations to form a cluster. To identify clusters, mapping was performed with the support of  
36  
37 150 local non-governmental organisations to determine areas where sex work is common and  
38  
39 151 noting the estimated number of possible survey participants in each area. Seventy clusters out  
40  
41 152 of a total of 401 clusters were selected based on probability proportionate to size (PPS).

42  
43  
44  
45  
46 153 The MSM were recruited using respondent driven sampling (RDS) in three districts of  
47  
48 154 Kathmandu valley. To begin with, a total of eight MSM/TG were recruited as seed. Those  
49  
50 155 seeds were informed about survey protocols and procedure and were encouraged to recruit  
51  
52 156 other eligible individuals from their social networks randomly to participate in the survey.  
53  
54 157 These initial seeds were provided three coupons to pass to their peers who are eligible to  
55  
56 158 participate in the survey.

1  
2  
3 159 Detailed methodology and sampling strategies for IBBS surveys have been described  
4  
5 160 previously [10,13–15].  
6  
7  
8 161

### 11 162 **Data variables for the present study**

14 163 IBBS survey included information on behavioural factors like uptake of  
15  
16 164 interventions for HIV, demographic, behavioural, psychosocial and structural  
17  
18 165 variables[10,13,14]. Structural factors included environmental/context conditions which  
19  
20 166 were outside the control of the individual, but which could influence his/her perceptions,  
21  
22 167 behaviour and health [21]. Psychosocial variables (social support and depression) were  
23  
24 168 assessed using social support questionnaire short form (SSQS) and centre for  
25  
26 169 epidemiological studies depression (CES-D) scale respectively. The CES-D tool showed  
27  
28 170 high reliability and validity in assessing depression in diverse groups such as PLHIV,  
29  
30 171 women and MSM with Cronbach's alpha  $\geq 0.85$  and comparative fit indices more than  
31  
32 172 0.90[22]. The CES-D is extensively normed and validated tool[23]. Similarly the reliability  
33  
34 173 and construct validity of scale SSQS reported high ( $>0.90$ ) by different studies [24,25].  
35  
36 174

37  
38  
39  
40  
41 175 Median score of  $<5$  in SSQS scale was interpreted as 'dissatisfied with available social  
42  
43 176 support'. CES-D scale more than 16-21 and  $\geq 22$  were to classify distress and depression  
44  
45 177 respectively. We also assessed suicidality under psychosocial-related variables. Prevalence of  
46  
47 178 demographic, behavioural, psychosocial and structural factors have been summarised in **web-**  
48  
49 179 **only tables 1 and 2.**

50  
51  
52  
53 180 A self-reported visit to an HTC facility in past year by the FSW and MSM/TG was  
54  
55 181 chosen as the outcome variable. The outcome variable assessed by asking 'Have you visited  
56  
57 182 (Yes vs. No) any HTC centers in the last 12 months?' (Reasons for visiting: pre-post  
58  
59  
60

1  
2  
3 183 HIV/AIDS test counselling, information on HIV/AIDS window period, HIV/AIDS test result,  
4  
5 184 counselling on using condom correctly in each sexual intercourse). In addition to reasons  
6  
7 185 above, discussion on safe injecting behaviour was also one of the self-reported reasons among  
8  
9 186 PWID for visiting HTC. The independent variables (demographic, behavioural, psychosocial  
10  
11 187 and structural risk variables) selected in this study have been described in web-only box 1.  
12  
13

## 14 15 188 **Analysis and statistics**

16  
17  
18 189 Data analysis was done separately for FSW and MSM/TG. Data was analysed using  
19  
20 190 STATA (version 12.1 STATA Corp., College Station, TX, USA).Categorical variables were  
21  
22 191 described using frequency and proportions. The unadjusted and adjusted analysis was  
23  
24 192 performed separately for FSW and MSM/TG to assess the association of factors with the  
25  
26 193 outcome variable (not utilising HTC in last one year). All the RDS-related descriptive output  
27  
28 194 were adjusted to represent the structure of the study population (MSM/TG) which was based  
29  
30 195 on information regarding who recruited whom, and the relative size of the respondent's  
31  
32 196 network using the Volz–Heckathorn estimator (RDS II) (20).To assess the network size  
33  
34 197 among MSM/TG, the following question was asked: “How many other MSM/TG do you  
35  
36 198 know who also know you well? (Knowing someone is defined as being able to contact them  
37  
38 199 and having had to contact with them in the past 12 months).” RDS-adjusted values presented  
39  
40 200 in web-only table 1. Convergence plot for outcome variable is shown in web-only figure  
41  
42 201 1.Adjustment for clustering of two-stage cluster sampling was not required in FSW data as it  
43  
44 202 was a self-weighted sample.  
45  
46  
47  
48

49  
50 203 Bivariate associations between each independent variable and non-utilization of HTC  
51  
52 204 were calculated using variance inflation factor after assessment for multicollinearity.  
53  
54 205 Variables with a p-value of <0.2 in the bivariate analysis were included in the regression  
55  
56 206 model (enter method). Adjusted prevalence ratios (aPR)with 95% confidence intervals  
57  
58  
59  
60

1  
2  
3 207 (CI)were calculated by fitting a Poisson regression with robust variance estimates. The  
4  
5 208 variables included in multivariate model (adjusted prevalence ratio)for FSWwere age group,  
6  
7 209 educational status, condom use at last sex, ever inject drugs, ever participated in HIV  
8  
9 210 awareness program,physical assault in last year, forced sex in last year, having dependents,  
10  
11 211 police detention in last 6 months, stigma towards HIV and distress/depression.The variables  
12  
13 212 included in adjusted prevalence ratio for MSM/TG were an age group, condom use at last sex,  
14  
15 213 drinking alcohol, ever participated in HIV awareness programme, physical assault in last year,  
16  
17 214 forced sex in last year, and discrimination in job and suicidal thought ‘ever’.

20  
21  
22 215 Initially, we used the log-binomial model to assess the association between  
23  
24 216 independent and outcome variable of interest. However, the log-binomial model fails to  
25  
26 217 converge. To overcome the effects of failed convergence, we have used the Poisson  
27  
28 218 regression with robust variance estimates as recommended by the Tyler et al.[26].Poisson  
29  
30 219 regression with robust variance can be used as an alternative of logistic regression and also  
31  
32 220 provides accurate estimates in the cross-sectional study with binary outcome of interest[27].  
33  
34 221 We have calculated the prevalence ratio because it is easy to interpret than the odds ratio. We  
35  
36 222 also assessed associations between outcome and independent variables via Poisson model  
37  
38 223 using individualised RDS weights (web-only table 3).

40  
41  
42 224

#### 43 44 225 **Ethical Considerations**

45  
46 226 Ethics approval for IBBS survey 2012 was given by the Nepal Health Research  
47  
48 227 Council (NHRC), Kathmandu, Nepal. Approval for the analysis of secondary data for this  
49  
50 228 study was taken in 2016 from Ethics Advisory Group, the International Union Against  
51  
52 229 Tuberculosis and Lung Disease (The Union), Paris, France. Administrative approval was also  
53  
54  
55 230 received from NCASC and Public Health and Environment Research Center (PERC) Nepal.

1  
2  
3 231 Waiver of informed consent was sought and approved by the ethics committee as this study  
4  
5 232 involved analysis of secondary data.  
6  
7

## 8 233 **RESULTS**

9  
10  
11 234 IBBS survey 2012 included 610 FSW with the response rate among FSW was 88.9%.  
12  
13 235 The non-responders were replaced by the randomly selected another FSW of the same cluster.  
14  
15 236 The HIV prevalence was 1 percent among FSW. The proportion of FSW in the age group 16  
16  
17 237 to 19 was 13.9%. The prevalence of non-utilization of HTC in last one year was 54% among  
18  
19 238 FSW. More than half FSW (59%) were married, 24% of them were divorced or separated.  
20  
21 239 Two-third (68%) of FSW were literate (Table 1 and web-only table 2).  
22  
23  
24

25  
26 240 IBBS survey 2012 included 400 MSM/TG, and we did not record non-response among  
27  
28 241 MSM/TG because of nature of sampling technique, i.e., study participants enrol the other  
29  
30 242 possible participants in the study. The HIV prevalence was 3.3 percent among MSM/TG. The  
31  
32 243 proportion of MSM/TG in the age group 16 to 19 was 17.2%. Non-utilization of HTC in last  
33  
34 244 one year was 55% for MSM/TG. The majority of the MSM/TG were unmarried (72%)  
35  
36 245 whereas very few of them were illiterate (3%). Other characteristics of the FSW and MSM/TG  
37  
38 246 are presented in web-only tables 1 and 2.  
39  
40  
41

42 247 The factors associated with non-utilisation of HTC in last one year among FSW and  
43  
44 248 MSM/TG are summarised in **Table 1** and **Table 2** respectively. In multivariable analysis, the  
45  
46 249 association between non-utilisation of HTC and distress/depression remained significant.  
47  
48 250 FSW experiencing distress (APR: 1.4, 95% CI: 1.1–1.5) and depression (APR: 1.4, 95% CI:  
49  
50 251 1.1–1.6) were more likely to non-utilization of HTC in the past year. Similarly FSW who  
51  
52 252 were injecting drugs (ever) (APR: 1.4, 95% CI: 1.1–1.8), ever participated in HIV awareness  
53  
54 253 programmes (APR: 1.2, 95% CI: 1.0–1.4), or no dependents in the family (APR: 1.1, 95% CI:  
55  
56 254 1.0–1.3) were more likely to non-utilization of HTC. FSW who experienced forced sex (APR:  
57  
58  
59  
60

1  
2  
3 255 1.1, 95% CI: 1.0–1.3) in the last 12 months were also more likely to non-utilization of HTC  
4  
5 256 (Table 1). episode  
6  
7  
8 257 MSM/TG who were adolescents aged 16-19 years (APR: 1.4, 95% CI: 1.1–1.7) and  
9  
10 258 experienced physical assault (APR: 1.8, 95% CI: 1.0–3.1) were more likely to non-utilization  
11  
12 259 of HTC. However, MSM/TG who experienced forced sex (APR: 0.5, 95% CI: 0.3–0.9) were  
13  
14 260 less likely to non-utilization of HTC. MSM/TG who did not use condom during their last sex  
15  
16 261 (APR: 1.2, 95% CI: 1.0–1.4) or participated in HIV awareness programs (APR: 1.6, 95% CI:  
17  
18 262 1.3–2.0) were more likely to non-utilization of HTC (Table 2).  
19  
20  
21  
22  
23  
24  
25  
26  
27  
28  
29

264 **Table 1.** Factors associated with non-utilization of HIV Testing and Counselling (HTC)  
265 centres among female sex workers surveyed under Integrated Biological and Behavioural  
266 Surveillance Survey, 2012, Nepal

| Variables                                      |                        | Total<br>N | HTC not<br>Utilised <sup>@</sup><br>n(%) | Adj PR**      |
|------------------------------------------------|------------------------|------------|------------------------------------------|---------------|
| <b>Total</b>                                   |                        | <b>610</b> | <b>330(54)</b>                           |               |
| <b>Demographic</b>                             |                        |            |                                          |               |
| Age in years                                   | 16-19                  | 85         | 51 (60)                                  | 1.0 (0.8-1.2) |
|                                                | 20-24                  | 130        | 73(56)                                   | 1.0 (0.7-1.2) |
|                                                | >25                    | 395        | 206 (52)                                 | Ref.          |
| Educational Status                             | Illiterate             | 196        | 98 (50)                                  | 0.9(0.7-1.0)  |
|                                                | Literate               | 414        | 232 (56)                                 | Ref.          |
| Marital Status                                 | Married                | 360        | 197 (55)                                 | Ref.          |
|                                                | Unmarried              | 102        | 60 (59)                                  | -             |
|                                                | Separated/<br>Divorced | 148        | 73 (49)                                  | -             |
| Having dependents                              | Yes                    | 341        | 169 (50)                                 | Ref.          |
|                                                | No                     | 269        | 161 (60)                                 | 1.1(1.0-1.3)* |
| <b>Behavioural</b>                             |                        |            |                                          |               |
| Condom use at last sex                         | Yes                    | 461        | 256(56)                                  | Ref.          |
|                                                | No                     | 149        | 74(32)                                   | 0.9(0.7-1.0)  |
| Ever inject drugs                              | Yes                    | 40         | 29(73)                                   | 1.4(1.1-1.8)* |
|                                                | No                     | 570        | 301(53)                                  | Ref.          |
| <b>Structural</b>                              |                        |            |                                          |               |
| Ever participated in HIV awareness<br>programs | Yes                    | 169        | 102(52)                                  | 1.2(1.0-1.4)* |
|                                                | No                     | 441        | 228(60)                                  | Ref.          |
| Physical assault in last year                  | Yes                    | 81         | 36 (44)                                  | 0.8 (0.6-1.0) |
|                                                | No                     | 529        | 294 (56)                                 | Ref.          |
| Housing Instability                            | Homeless               | 15         | 6 (40)                                   | -             |
|                                                | Own home               | 320        | 169 (53)                                 | -             |

|                                    |              |     |          |               |
|------------------------------------|--------------|-----|----------|---------------|
|                                    | Rented       | 275 | 155 (56) |               |
| Forced sex in last year            | Yes          | 125 | 84 (67)  | 1.1(1.0-1.3)* |
|                                    | No           | 485 | 246 (51) | Ref.          |
| Police detention in last 6 months  | Yes          | 81  | 37 (46)  | 0.8(0.6-1.0)  |
|                                    | No           | 529 | 293 (55) | Ref.          |
| Client refusal to pay in last year | Yes          | 153 | 89 (58)  | -             |
|                                    | No           | 457 | 241 (53) | -             |
| <b>Psychosocial</b>                |              |     |          |               |
| Stigma towards HIV                 | Yes          | 295 | 168(57)  | 1.0(0.9-1.2)  |
|                                    | No           | 315 | 162(51)  | Ref.          |
| Suicidal thoughts (Ever)           | Yes          | 210 | 117(56)  | -             |
|                                    | No           | 399 | 212 (53) | -             |
| Depression <sup>#</sup>            | Euthymic     | 342 | 159 (46) | Ref.          |
|                                    | Distressed   | 156 | 100 (64) | 1.4(1.1-1.5)* |
|                                    | Depressed    | 112 | 71 (63)  | 1.4(1.1-1.6)* |
| SSQS <sup>^</sup>                  | Satisfied    | 530 | 289(55)  | -             |
|                                    | Dissatisfied | 80  | 41(51)   | -             |

267 <sup>@</sup>Not utilised in last one year; \* p<0.05; \*\*Adjusted prevalence ratio using Poisson regression with robust  
 268 variance estimates (enter method); factors with Unadjusted PR with p<0.2 included in the model and collinearity  
 269 checked; <sup>#</sup>Depression measured using a CES-D scale; <sup>^</sup>SSQS- The Social Support Questionnaire Score.  
 270

271

272 **Table 2.** Factors associated with non-utilization of HIV Testing and Counselling (HTC)  
 273 centres among Men having Sex with Men/Transgender surveyed under Integrated Biological  
 274 and Behavioural Surveillance Survey, 2012, Nepal

| Variables                                   |            | HTC not Utilised <sup>@</sup> |                   | Adj PR**      |
|---------------------------------------------|------------|-------------------------------|-------------------|---------------|
|                                             |            | N                             | n(%) <sup>‡</sup> |               |
| <b>Total</b>                                |            | <b>400</b>                    | <b>221(55)</b>    |               |
| <b>Demographic factors</b>                  |            |                               |                   |               |
| Age in years                                | 16-19      | 69                            | 54(78)            | 1.4(1.1-1.7)* |
|                                             | 20-24      | 129                           | 73(57)            | 1.1(0.9-1.4)  |
|                                             | >25        | 202                           | 94(47)            | Ref           |
| Educational Status                          | Illiterate | 13                            | 7(54)             | -             |
|                                             | Literate   | 387                           | 214(55)           | -             |
| Marital Status                              | Unmarried  | 289                           | 163(56)           | -             |
|                                             | Married    | 111                           | 58(52)            | -             |
| <b>Behavioural</b>                          |            |                               |                   |               |
| Condom use at last sex                      | Yes        | 339                           | 177(72)           | Ref.          |
|                                             | No         | 61                            | 44(52)            | 1.2(1.0-1.4)* |
| Drinking Alcohol                            | Yes        | 323                           | 186(58)           | 1.2(0.9-1.5)  |
|                                             | No         | 77                            | 35(45)            | Ref.          |
| <b>Structural</b>                           |            |                               |                   |               |
| Ever Participated in HIV awareness programs | Yes        | 185                           | 62(34)            | 1.6(1.3-2.0)* |
|                                             | No         | 215                           | 159(74)           | Ref.          |
| Physical assault in last year               | Yes        | 57                            | 10(18)            | 1.8(1.0-3.1)* |
|                                             | No         | 343                           | 211(62)           | Ref.          |
| Housing instability                         | Homeless   | 8                             | 4(50)             | -             |
|                                             | Own home   | 75                            | 42(56)            | -             |
|                                             | Rented     | 317                           | 175(55)           | -             |
| Forced sex in last year                     | Yes        | 52                            | 10(19)            | 0.5(0.3-0.9)* |
|                                             | No         | 348                           | 211(61)           | Ref.          |



|                             |              |     |         |              |
|-----------------------------|--------------|-----|---------|--------------|
| Discrimination in Job       | Yes          | 79  | 17(22)  | Ref.         |
|                             | No           | 321 | 204(64) | 1.3(0.8-2.2) |
| <b>Psychosocial factors</b> |              |     |         |              |
| Stigma towards HIV          | Yes          | 253 | 138(54) | -            |
|                             | No           | 147 | 83(56)  | -            |
| Suicidal thought Ever       | Yes          | 107 | 33(31)  | 0.7(0.5-1.0) |
|                             | No           | 293 | 188(64) | Ref.         |
| Depression <sup>#</sup>     | Euthymic     | 220 | 121(59) | -            |
|                             | Distressed   | 83  | 49(53)  | -            |
|                             | Depressed    | 97  | 51(55)  | -            |
| SSQS <sup>^</sup>           | Satisfied    | 390 | 216(55) | -            |
|                             | Dissatisfied | 10  | 5(50)   | -            |

275 **¥Unweighted descriptive statistics. For RDS-weighted estimates refer to web-only table 3; @Not utilised in**  
 276 **last one year; \* p<0.05; \*\*Adjusted prevalence ratio using Poisson regression with robust variance estimates**  
 277 **(enter method); factors with Unadjusted PR with p<0.2 included in model and collinearity checked; #Depression**  
 278 **measured using a CES-D scale; ^SSQS- The Social Support Questionnaire Score.**  
 279

## 280 DISCUSSION

281 In IBBS 2012 survey, in addition to individual level variables, psychosocial and  
 282 structural factors were added. To the best of our knowledge, this study is the first to explore  
 283 the relation of psychosocial and structural factors with HTC non-utilization among FSW and  
 284 MSM/TG in Nepal. The uptake of HTC was low (around 55%) among MSM/ TG in Nepal  
 285 which is consistent with the findings of studies conducted in Assam and Andra Pradesh India,  
 286 Zhejiang province China and Bangkok Thailand[28–31].Our study also demonstrates a low  
 287 level of uptake of HTC among PWID in Nepal which is even lower (33%) among PWID of  
 288 Manipur and Nagaland in India[32]. The current scenario suggests that the low uptake of HTC  
 289 among MSM/TG and PWID not only challenge the timely identification and linking them to  
 290 treatment to improve their health but also increase the risk of secondary transmission from  
 291 HIV-infected MSM/TG and PWID to their partners. Community-based HTC with different  
 292 approaches (mobile testing and door-to-door testing etc.) that found effective in increasing  
 293 uptake of HTC and linking them to HIV care among MSM/TG and PWID in other  
 294 settings[33] need to be evaluated in the context of Nepal. Otherwise, the 90-90-90 targets  
 295 prioritised to improve health and prevention of secondary HIV transmission would not be

1  
2  
3 296 possible in Nepal. This study also found different risk factors for non-utilization of HTC in  
4  
5 297 last one year among FSW and MSM/TG.They were demographic: late adolescents  
6  
7 298 (MSM/TG); behavioural: injectable drug abuse (FSW) and no condom use at last sex  
8  
9 299 (MSM/TG); structural: participation in HIV awareness programmes (FSW and MSM/TG),  
10  
11 300 forced sex in last one year (risk factor among FSW and protective factor among MSM/TG),  
12  
13 301 absence of dependent members (FSW), physical assault in last year (MSM/TG); and  
14  
15 302 psychosocial: being distressed/depressed (FSW).  
16  
17

18  
19 303 Psychosocial factors play an important role in health services utilisation [16]. FSW  
20  
21 304 who had distress or depression (four out of every 10) had a higher prevalence of non-  
22  
23 305 utilization of HTC. This could have resulted in disempowerment and thereby resulting in not  
24  
25 306 accessing HTC services when needed[13,14].Studies have found that FSW used alcohol and  
26  
27 307 drugs, to reduce stress and to help them cope with their work[17,34].Gambian study showed  
28  
29 308 that women who experienced forced sex reported severe depression[35].A study conducted  
30  
31 309 among FSW working outside of the capital city (Kathmandu) found a very high prevalence of  
32  
33 310 depression, and the experience of any form violence (verbal, physical and sexual) was also  
34  
35 311 common among them and also associated with depression[36].Currently, there are no targeted  
36  
37 312 programs that address the mental health problems of FSW in Nepal and lack of laws that  
38  
39 313 protect the rights of sex workers also exacerbating the experience of violence among them.  
40  
41 314 Efforts addressing the experience of violence and its consequences (depression) among FSW  
42  
43 315 are essential in Nepal otherwise it would be difficult to increase uptake of HTC among them.  
44  
45  
46

47 316 According to the IBBS survey report of 2012, old MSM/TG were found to use  
48  
49 317 condoms more when compared to younger ones. Similarly, the median age of first sexual  
50  
51 318 intercourse being 16 years and the fact that the old adolescents (16-19 years) MSM/TG did not  
52  
53 319 significantly access HTC is a cause of concern[10,13]. The risk-taking behaviour in  
54  
55 320 adolescents can compound their risk in acquiring HIV, and hence this group need to be  
56  
57  
58  
59  
60

1  
2  
3 321 targeted. In Nepal, the blanket approach to implementing interventions (HTC) without  
4  
5 322 considering the specific needs of adolescents or young people belonging to key populations  
6  
7 323 might have effects in low uptake of HTC among them. Evidence from China suggests that the  
8  
9 324 use of peer-led community-based rapid HIV test increase the uptake of HIV testing among  
10  
11 325 young MSM[37].

12  
13  
14 326 Not visiting an HTC facility was also associated with not using a condom during last  
15  
16 327 sex among MSM/TG. FSW who were injecting drugs were also less likely to uptake HTC in  
17  
18 328 the last 12 months. Our study findings are consistent with the study conducted among FSW in  
19  
20 329 Vietnam where unprotected sex and injecting drug use associated with less likely to have  
21  
22 330 voluntary HIV test [38]. The findings suggest that we are missing to reach those FSW who  
23  
24 331 were at increased risk for HIV due to their risky dual behaviours such as unprotected sex or  
25  
26 332 injecting drug abuse.

27  
28  
29 333 Some factors affecting utilisation of HTC by MSM/TG were different from that of  
30  
31 334 FSW. In events like forced sex in last year among FSW, it reduced the utilisation of HTCs  
32  
33 335 among FSW. Among MSM/TG, the experience of forced sex led to the utilisation of HTC.  
34  
35 336 The difference might be due to the fact that MSM/TG are highly networked population than  
36  
37 337 the FSW[39]such as most of them are directly and indirectly associated with their community  
38  
39 338 organisations (Blue Diamond Society) which work for the rights of gender and sexuality  
40  
41 339 minorities in Nepal. That may have resulted to seek available services among MSM/TG after  
42  
43 340 experiencing the sexual abuse.

44  
45  
46  
47 341 Participation in HIV awareness programmes by key population showed decreasing  
48  
49 342 trend over the years [10,13]. Participation as a risk factor for non-utilisation of HTC for both  
50  
51 343 FSW and MSM/TG seemed intriguing. The activities which enlisted more participation were  
52  
53 344 short duration events like condom/AIDS day celebration compared to effective training  
54  
55 345 methods like demonstration classes, workshops,etc.(web-only table 2). These aforementioned  
56  
57  
58  
59  
60

1  
2  
3 346 short-term awareness activities might not affect knowledge level of FSW and MSM/TG about  
4  
5 347 the importance of HTC. The other explanation for this could be the cross-sectional nature of  
6  
7 348 data. Those who had visited an HTC in last one year might not have felt the need for attending  
8  
9 349 HIV awareness programmes.

10  
11  
12 350 Despite being limited by a cross-sectional design, the findings of this study bring out  
13  
14 351 three significant policy implications. First, the intervention to address the burden of  
15  
16 352 depression needs to be an integral part of programmes for FSW and MSM/TG at all levels.  
17  
18 353 Second, HTC should be developed as an empowerment centre or training to improve their  
19  
20 354 skills that help FSW and MSM/TG to tackle physical and sexual abuse. Third, specific  
21  
22 355 prevention programmes should be rolled out to reach adolescent FSW and MSM/TG, and  
23  
24 356 FSW who were practising dual risk behaviours such as inconsistent condom use or injecting  
25  
26 357 drug use. The HTC centre should also consider the specific needs of adolescent FSW or  
27  
28 358 MSM/TG.

29  
30  
31  
32  
33 359 Our study adhered to STROBE guidelines for conduct and report of the study [40].  
34  
35 360 The findings are generalizable to FSW, and MSM/TG of Nepal as standard sampling strategy  
36  
37 361 was followed for the IBBS survey [10,13–15]. The present study had inherent limitations of  
38  
39 362 analysing secondary data. Certain pertinent variables (for example; injectable drug abuse in  
40  
41 363 last 12 months among MSM/TG) could not be included in the analysis due to missing data.  
42  
43 364 The limitations of the original survey like social desirability bias, recall bias due to the  
44  
45 365 assessment of past exposures might have influenced the self-reported variables. The cross-  
46  
47 366 sectional design itself could result in difficulties in ascertaining temporality between various  
48  
49 367 factors studied and non-utilization of HTC.

50  
51  
52  
53  
54 368

55  
56  
57 369  
58  
59  
60

1  
2  
3 370 **CONCLUSION**  
4  
5

6 371 To conclude, the psychosocial and structural factors are influencing utilisation of HIV  
7  
8 372 testing and counselling centres among FSW and MSM/TG in Nepal. In addition to focussing  
9  
10 373 on these risk factors, there is a need to improve HTC to lend psychosocial support or to  
11  
12 374 address the need of specific adolescent FSW and MSM/TG or FSW who also inject drugs.  
13  
14 375 Creative behaviour change and communication strategies or interventions to improve skills to  
15  
16 376 tackle physical and sexual abuse should be ensured to overcome the limitations of current  
17  
18 377 programmes for key populations in Nepal.  
19  
20

21  
22 378

23  
24 379 **Acknowledgements**  
25

26 380 This research was conducted through the Structured Operational Research and Training  
27  
28 381 Initiative (SORT IT), a global partnership led by the Special Programme for Research and  
29  
30 382 Training in Tropical Diseases at the World Health Organization (WHO/TDR). The training  
31  
32 383 programme, funded by the Department for International Development (DFID), UK, did not  
33  
34 384 fund the research per say. The funders of the training programme had no role in study design,  
35  
36 385 data collection and analysis, decision to publish, or preparation of the manuscript. The model  
37  
38 386 is based on a course developed jointly by the International Union Against Tuberculosis and  
39  
40 387 Lung Disease (The Union) and Médecinssans Frontières (MSF/Doctors Without Borders).  
41  
42 388 The specific SORT IT programme which resulted in this publication was jointly developed  
43  
44 389 and implemented by: The Union South-East Asia Office, New Delhi, India; the Centre for  
45  
46 390 Operational Research, The Union, Paris, France; The Union, Mandalay, Myanmar; the  
47  
48 391 Operational Research Unit (LUXOR), MSF Brussels Operational Center, Luxembourg;  
49  
50 392 Department of Preventive and Social Medicine, Jawaharlal Institute of Postgraduate Medical  
51  
52 393 Education and Research, Puducherry, India; Department of Community Medicine,  
53  
54 394 Government T.D Medical College, Alappuzha, India; College of Life and Environmental  
55  
56  
57  
58  
59  
60

1  
2  
3 395 Sciences, Exeter University, UK; Velammal Medical College Hospital & Research Institute,  
4  
5 396 Madurai, India; and Institute of Medicine, University of Chester, UK.

6  
7 397

8  
9 398 **Funding:** All the IBBS survey-related activities were funded by The Global Fund to Fight  
10  
11 399 AIDS, Tuberculosis and Malaria (GFATM). This research received no specific grant from any  
12  
13 400 funding agency in the public, commercial or not-for-profit sectors.

14  
15 401

16  
17 402 **Competing interest:** None

18  
19 403

20  
21 404 **Contributors:** RS, SP, HDS and KD were involved in conception and design of the study; all  
22  
23 405 authors were involved in analysis and interpretation of data; RS prepared the first draft, and  
24  
25 406 all authors were involved in critically reviewing the draft and approving the final draft for  
26  
27 407 submission.

28  
29 408 **Data availability statement:** Data is available to the corresponding author and will be  
30  
31 409 provided on request.

32  
33 410 **Provenance and peer review:** Not commissioned; externally peer reviewed.

34  
35 411

36  
37 412 REFERENCES

38  
39 413 1 World Health Organization(WHO). HIV factsheet. 2015.

40  
41 414 2 UNAIDS. 90-90-90 An ambitious treatment target to help end the AIDS epidemic.  
42  
43 415 Swizerland: 2014.

44  
45 416 3 World Health Organization. Global update on HIV treatment 2013: Results, impact and  
46  
47 417 opportunities. 2013.

48  
49 418 4 NCASC. Review of the National HIV Surveillance System: Strengthening the HIV

- 1  
2  
3 419 Second Generation Surveillance in Nepal. Kathmandu: 2007.  
4  
5  
6 420 5 NCASC. National Consolidated Guidelines for Treating and Preventing HIV in Nepal.  
7  
8 421 2014.  
9  
10  
11 422 6 Gardner EM, McLees MP, Steiner JF, *et al.* The spectrum of engagement in HIV care  
12  
13 423 and its relevance to test-and-treat strategies for prevention of HIV infection. *Clin Infect*  
14  
15 424 *Dis* 2011;**52**:793–800. doi:10.1093/cid/ciq243  
16  
17  
18 425 7 Koirala S, Deuba K, Nampaisan O, *et al.* Facilitators and barriers for retention in HIV  
19  
20 426 care between testing and treatment in Asia—A study in Bangladesh, Indonesia, Lao,  
21  
22 427 Nepal, Pakistan, Philippines and Vietnam. 2017;:1–20.  
23  
24 428 doi:10.1371/journal.pone.0176914  
25  
26  
27  
28 429 8 NCASC. Factsheet : HIV Epidemic Update of Nepal , as of December 2015.  
29  
30  
31 430 9 NCASC. Integrated Biological and Behavioral Surveillance ( IBBS ) Survey among  
32  
33 431 Female Sex Workers in 22 Terai Highway Districts of Nepal Round V. 2016.  
34  
35  
36 432 10 NCASC. Integrated Biological and Behavioral Surveillance (IBBS) Survey among  
37  
38 433 Men who have sex with men (MSM) and Transgender (TG) people in Kathmandu  
39  
40 434 Valley, Nepal. Kathmandu: 2012.  
41  
42  
43  
44 435 11 World Health Organization. Preventing HIV/AIDS in young people: A systematic  
45  
46 436 review of the evidence from developing countries. 2006.  
47  
48  
49 437 12 Lightfoot M. HIV prevention for adolescents: where do we go from here? *Am Psychol*  
50  
51 438 2012;**67**:661–71. doi:10.1037/a0029831  
52  
53  
54 439 13 NCASC. Integrated Biological and Behavioral Surveillance Survey (IBBS) among  
55  
56 440 Male Injecting Drug Users (IDUs) in Western to FarWestern Terai of Nepal.  
57  
58  
59  
60

- 1  
2  
3 441 Kathmandu: 2012.  
4  
5  
6 442 14 NCASC. Integrated Biological and Behavioral Surveillance (IBBS) Survey among  
7  
8 443 Female Sex Workers in 22 Terai Highway Districts of Nepal. Kathmandu: 2012.  
9  
10  
11 444 15 Deuba K, Anderson S, Ekstrom AM, *et al.* Micro-level social and structural factors act  
12  
13 445 synergistically to increase HIV risk among Nepalese female sex workers. *Int J Infect*  
14  
15 446 *Dis* 2016;**49**:100–6. doi:10.1016/j.ijid.2016.06.007  
16  
17  
18 447 16 Deuba K, Ekström AM, Shrestha R, *et al.* Psychosocial Health Problems Associated  
19  
20 448 with Increased HIV Risk Behavior among Men Who Have Sex with Men in Nepal: A  
21  
22 449 Cross-Sectional Survey. *PLoS One* 2013;**8**. doi:10.1371/journal.pone.0058099  
23  
24  
25  
26 450 17 Stall R, Mills TC, Williamson J, *et al.* Association of Co-Occurring Psychosocial  
27  
28 451 Health Problems and Increased Vulnerability to HIV/AIDS among Urban Men Who  
29  
30 452 Have Sex with Men. *Am J Public Health* 2003;**93**:939–42. doi:10.2105/AJPH.93.6.939  
31  
32  
33 453 18 Strathdee SA, West BS, Reed E, *et al.* Substance Use and HIV Among Female Sex  
34  
35 454 Workers and Female Prisoners: Risk Environments and Implications for Prevention,  
36  
37 455 Treatment, and Policies. 2015;**69**:1–15.  
38  
39 456 doi:10.1097/QAI.0000000000000624.Substance  
40  
41  
42  
43 457 19 Patel SK, Saggurti N, Pachauri S, *et al.* Correlates of Mental Depression Among  
44  
45 458 Female Sex Workers in Southern India. *Asia-Pacific J public Heal* Published Online  
46  
47 459 First: 2015. doi:10.1177/1010539515601480  
48  
49  
50  
51 460 20 OECD. DAC list of ODA Recipients 2014. 2014. doi:Accessed on 4march 2016  
52  
53  
54 461 21 UNAIDS. Combination HIV Prevention: tailoring and coordinating biomedical,  
55  
56 462 behavioural and structural strategies to reduce new HIV infections. 2010.  
57  
58  
59  
60



- 1  
2  
3 463 22 Natamba BK, Achan J, Arbach A, *et al.* Reliability and validity of the center for  
4  
5 464 epidemiologic studies-depression scale in screening for depression among HIV-  
6  
7 465 infected and -uninfected pregnant women attending antenatal services in northern  
8  
9 466 Uganda: a cross-sectional study. *BMC Psychiatry* 2014;**14**:303. doi:10.1186/s12888-  
10  
11 467 014-0303-y
- 14 468 23 Radloff LS. The CES-D Scale: a self-report depression scale for research in the general  
15  
16 469 population. *Appl Psychol Meas* 1977;**1**:385–401. doi:10.1177/014662167700100306  
17  
18  
19  
20 470 24 Vyavaharkar M, Moneyham L, Corwin S, *et al.* Relationships between stigma, social  
21  
22 471 support, and depression in HIV-infected African American women living in the rural  
23  
24 472 Southeastern United States. *NIH-PA* 2011;**21**.  
25  
26 473 doi:10.1016/j.jana.2009.07.008.Relationships  
27  
28  
29  
30 474 25 Yi MS, Mrus JM, Wade TJ, *et al.* Religion, spirituality, and depressive symptoms in  
31  
32 475 patients with HIV/AIDS. *J Gen Intern Med* 2006;**21**:21–7. doi:10.1111/j.1525-  
33  
34 476 1497.2006.00643.x  
35  
36  
37 477 26 Williamson T, Eliasziw M, Fick G. Log-binomial models: exploring failed  
38  
39 478 convergence. *Emerg Themes Epidemiol* 2013;**10**:14. doi:10.1186/1742-7622-10-14  
40  
41  
42 479 27 Barros AJ, Hirakata VN. Alternatives for logistic regression in cross-sectional studies:  
43  
44 480 an empirical comparison of models that directly estimate the prevalence ratio. *BMC*  
45  
46 481 *Med Res Methodol* 2003;**3**:21. doi:10.1186/1471-2288-3-21  
47  
48  
49  
50 482 28 Jha UM, Raj Y, Venkatesh S, *et al.* HIV epidemic among men who have sex with men  
51  
52 483 in India: National scenario of an unfinished agenda. *HIV/AIDS - Res Palliat Care*  
53  
54 484 2014;**6**:159–70. doi:10.2147/HIV.S69708  
55  
56  
57 485 29 Li R, Pan X, Ma Q, *et al.* Prevalence of prior HIV testing and associated factors among  
58  
59  
60

- 1  
2  
3 486 MSM in Zhejiang Province, China: a cross-sectional study. *BMC Public Health*  
4  
5 487 2016;**16**:1152. doi:10.1186/s12889-016-3806-2  
6  
7  
8 488 30 Dandona R, Dandona L, Kumar a G, *et al.* HIV testing among female sex workers in  
9  
10 489 Andhra Pradesh, India. *Aids* 2005;:2031–41.  
11  
12  
13 490 31 Vutthikraivit P, Lertnimitr B, Chalardsakul P, *et al.* Prevalence of HIV testing and  
14  
15 491 associated factors among young men who have sex with men (MSM) in Bangkok,  
16  
17 492 Thailand. *J Med Assoc Thai* 2014;**97 Suppl 2**:S207–14.  
18  
19  
20  
21 493 32 Ganju D, Ramesh S, Saggurti N. Factors associated with HIV testing among male  
22  
23 494 injecting drug users: findings from a cross-sectional behavioural and biological survey  
24  
25 495 in Manipur and Nagaland, India. *Harm Reduct J* 2016;**13**:21. doi:10.1186/s12954-016-  
26  
27 496 0110-5  
28  
29  
30 497 33 Suthar AB, Ford N, Bachanas PJ, *et al.* Towards Universal Voluntary HIV Testing and  
31  
32 498 Counselling: A Systematic Review and Meta-Analysis of Community-Based  
33  
34 499 Approaches. *PLoS Med* 2013;**10**. doi:10.1371/journal.pmed.1001496  
35  
36  
37  
38 500 34 Saito T, Sadoshima J. High prevalence of forced sex among non-brothel based, wine  
39  
40 501 shop centered sex workers in Chennai, India. 2016;**116**:1477–90.  
41  
42 502 doi:10.1161/CIRCRESAHA.116.303790.The  
43  
44  
45 503 35 Sherwood JA, Grosso A, Decker MR, *et al.* Sexual violence against female sex workers  
46  
47 504 in The Gambia: a cross-sectional examination of the associations between victimization  
48  
49 505 and reproductive, sexual and mental health. *BMC Public Health* 2015;**15**:270.  
50  
51 506 doi:10.1186/s12889-015-1583-y  
52  
53  
54  
55 507 36 Sagtani RA, Bhattarai S, Adhikari BR, *et al.* Violence, HIV risk behaviour and  
56  
57 508 depression among female sex workers of eastern Nepal. *BMJ Open* 2013;**3**:e002763.  
58  
59  
60

1  
2  
3 509 doi:10.1136/bmjopen-2013-002763  
4

5  
6 510 37 Yan H, Zhang R, Wei C, *et al.* A peer-led , community-based rapid HIV testing  
7  
8 511 intervention among untested men who have sex with men in China : an operational  
9  
10 512 model for expansion of HIV testing and linkage to care. *Sex Transm Infect* 2014;:388–  
11  
12 513 93. doi:10.1136/sextrans-2013-051397  
13

14  
15 514 38 Tran BX, Nguyen LT, Nguyen NP, *et al.* HIV voluntary testing and perceived risk  
16  
17 515 among female sex workers in the mekong delta region of vietnam. *Glob Health Action*  
18  
19 516 2013;6:1–7. doi:10.3402/gha.v6i0.20690  
20  
21

22  
23 517 39 Deuba K, Ojha B, Shrestha R, *et al.* Optimizing the implementation of integrated  
24  
25 518 biological and behavioural surveillance surveys of HIV in resource limited settings-  
26  
27 519 lessons from Nepal. *Asian Pacific J Trop Dis* 2014;4:S605–15. doi:10.1016/S2222-  
28  
29 520 1808(14)60688-5  
30  
31

32  
33 521 40 von Elm E, Altman DG, Egger M, *et al.* The Strengthening the Reporting of  
34  
35 522 Observational Studies in Epidemiology (STROBE) Statement: Guidelines for reporting  
36  
37 523 observational studies. *Lancet* 2007;370:1453–7. doi:10.1016/j.ijisu.2014.07.013  
38  
39

40 524 **Licence statement**

41  
42  
43 525 The Corresponding Author has the right to grant on behalf of all authors and does grant on  
44  
45 526 behalf of all authors, an exclusive licence (or non-exclusive for government employees) on a  
46  
47 527 worldwide basis to the BMJ and co-owners or contracting owning societies (where published  
48  
49 528 by the BMJ on their behalf), and its Licensees to permit this article (if accepted) to be  
50  
51 529 published in Sexually Transmitted Infections and any other BMJ products and to exploit all  
52  
53 530 subsidiary rights, as set out in our licence.  
54  
55  
56  
57

58 531  
59  
60

1  
2  
3 532  
4  
5  
6 533  
7  
8

9 534 **Figure Legend**

10  
11 535 **Figure 1.**Study districts included in Integrated Biological and Behavioural Surveillance

12  
13  
14 536 (IBBS) survey 2012, Nepal.

15  
16  
17 537 Figure footnote

18  
19  
20 538 *\*MSM/TG – Men who have sex with men/transgender, PWID – people who inject drugs (we*

21  
22 539 *did not analyse PWID data), FSW – female sex workers; KTM valley- Kathmandu Valley*

23  
24  
25 540 **Web-only figure 1.**Convergence plot for the outcome of interest.

26  
27 541

28  
29 542

30  
31 543

32  
33 544  
34  
35  
36  
37  
38  
39  
40  
41  
42  
43  
44  
45  
46  
47  
48  
49  
50  
51  
52  
53  
54  
55  
56  
57  
58  
59  
60

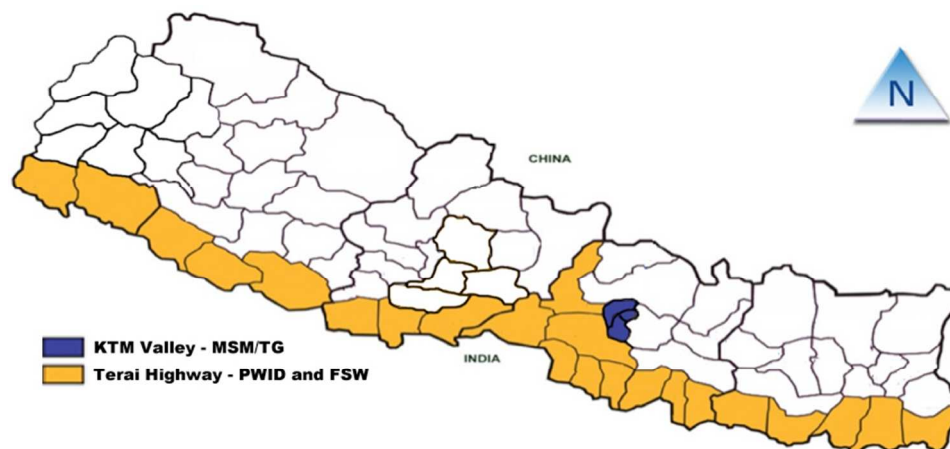

Figure 1. Study districts included in Integrated Biological and Behavioural Surveillance (IBBS) survey 2012, Nepal. Figure footnote \*MSM/TG – Men who have sex with men/transgender, PWID – people who inject drugs, FSW – female sex workers

1  
2  
3  
4  
5  
6  
7  
8  
9  
10  
11  
12  
13  
14  
15  
16  
17  
18  
19  
20  
21  
22  
23  
24  
25  
26  
27  
28  
29  
30  
31  
32  
33  
34  
35  
36  
37  
38  
39  
40  
41  
42  
43  
44  
45  
46  
47  
48  
49  
50  
51  
52  
53  
54  
55  
56  
57  
58  
59  
60

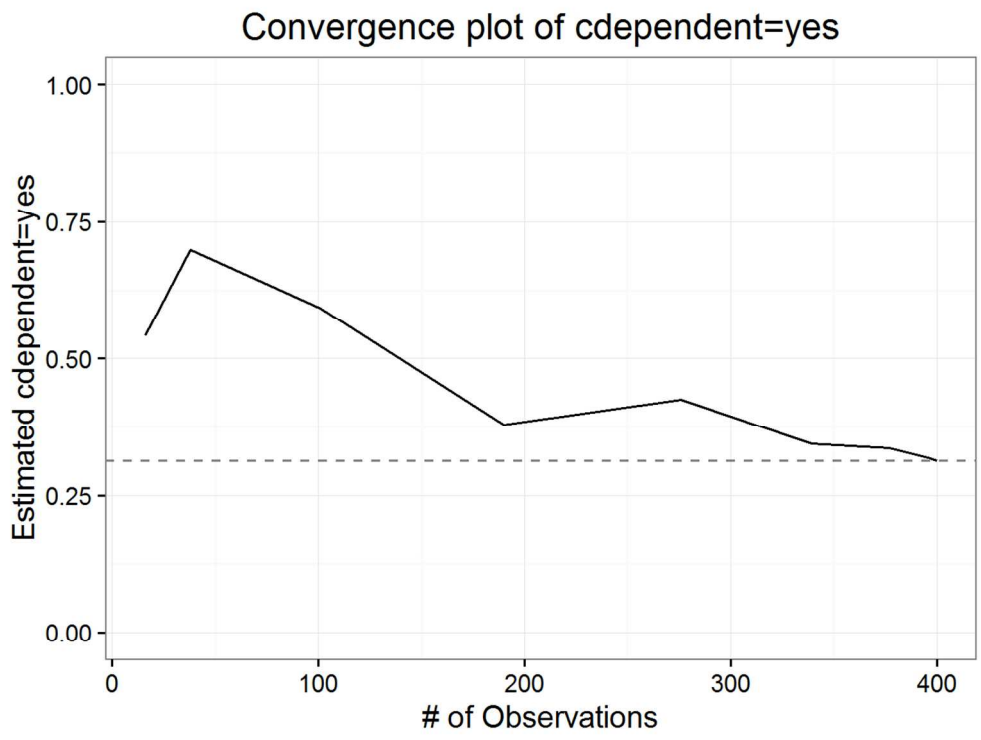

view only

**Web-only table 1.** The prevalence of demographic, psychosocial and structural factors among MSM/TG, IBBS 2012 Nepal.

| Factors                                       | MSM/TG*<br>Frequency<br>(%) | MSM/TG<br>RDS Adjusted<br>(CI) |
|-----------------------------------------------|-----------------------------|--------------------------------|
| <b>Total</b>                                  | 400 (100)                   |                                |
| HIV prevalence                                |                             | 3.3 (1.9-5.9)                  |
| HTC not utilized                              | 221(55)                     | 68.6 (54.3-80.1)               |
| <b>Demographic</b>                            |                             |                                |
| Age in years                                  |                             |                                |
| 16-19                                         | 69 (17)                     | 17.7(11.5-26.1)                |
| 20-24                                         | 129 (32)                    | 31.3(22.5-41.8)                |
| ≥25                                           | 202 (51)                    | 51.0(39.2-62.5)                |
| Illiterate                                    | 13(3)                       | 3.1(1.2-7.9)                   |
| Married                                       | 111(28)                     | 23.3(16.2-32.2)                |
| <b>Behavioural</b>                            |                             |                                |
| Condom use in last sex                        | 339(85)                     | 75.8(64.8-84.2)                |
| Drinking Alcohol                              | 323(81)                     | 81.0(71.3-88.1)                |
| <b>Structural</b>                             |                             |                                |
| Ever Participated in HIV awareness programs   | 185(46)                     | 35.6(23.9-49.2)                |
| Physical assault in last year                 | 57(14)                      | 6.3(3.6-10.8)                  |
| Housing instability                           |                             |                                |
| Own Home                                      | 75(19)                      | 19.9(12.4-30.3)                |
| Forced sex in last year                       | 52(13)                      | 5.5(3.3-9.1)                   |
| Discrimination in Job                         | 79(20)                      | 5.9(3.9-8.8)                   |
| <b>Psychosocial</b>                           |                             |                                |
| Stigma                                        | 253(63)                     | 63.2(52.0-73.2)                |
| Suicidal thought                              | 107(27)                     | 14.2(9.8-20.1)                 |
| Depression                                    |                             |                                |
| Distressed                                    | 83(21)                      | 14.9(10.3-21.1)                |
| Depressed                                     | 97(24)                      | 18.2(11.9-26.7)                |
| SSQS^                                         |                             |                                |
| Satisfied                                     | 390(97)                     | 98.5(96.1-99.4)                |
| Dissatisfied                                  | 10(3)                       | 1.5(0.5-3.8)                   |
| <b>Number of seed</b>                         | 8                           |                                |
| <b>Maximum no. of recruitment wave (mean)</b> | 8 (3.67)                    |                                |

1  
2  
3  
4  
5  
6  
7  
8  
9  
10  
11  
12  
13  
14  
15  
16  
17  
18  
19  
20  
21  
22  
23  
24  
25  
26  
27  
28  
29  
30  
31  
32  
33  
34  
35  
36  
37  
38  
39  
40  
41  
42  
43  
44  
45  
46  
47  
48  
49  
50  
51  
52  
53  
54  
55  
56  
57  
58  
59  
60

---

\*MSM/TG – Men who have sex with men/transgender, HIV- Human Immunodeficiency Virus., AIDS- Acquired immune deficiency syndrome, HTC-HIV Testing and Counselling, ^SSQS- The Social Support Questionnaire Score.

For peer review only



**Web-only table 2.** The prevalence of demographic, psychosocial and structural factors among FSW, IBBS 2012 Nepal.

| Factors                               | FSW<br>N (%) |
|---------------------------------------|--------------|
| <b>Total</b>                          | 610 (100)    |
| HIV prevalence                        | 6 (1)        |
| <b>Demographic</b>                    |              |
| Age in years                          |              |
| 16-19                                 | 85 (14)      |
| 20-24                                 | 130 (21)     |
| ≥25                                   | 395(65)      |
| Illiterate                            | 196(32)      |
| Married                               | 360(59)      |
| <b>Behavioural</b>                    |              |
| Use of condom with most recent client | 461(75)      |
| Consistent condom use                 | 236(59)      |
| <b>Structural</b>                     |              |
| Having dependents in family           | 341(56)      |
| Own home                              | 311(51)      |
| Forced sex in last one year           | 125(21)      |
| Knowledge regarding confidential HTC  | 397(65)      |
| Participated in discussion in HIV     | 84(29)       |
| Participated in HIV awareness program | 169(28)      |
| Participated in AIDS day              | 238(39)      |
| Participated in Condom Day            | 207(34)      |
| Participated in Workshop for HIV      | 110(18)      |
| Received demonstration on Condon Use  | 61(10)       |
| Comprehensive Knowledge on condom     | 122(20)      |
| <b>Psychosocial</b>                   |              |
| Stigma                                | 295(48)      |
| Suicidal thought                      | 210(34)      |
| Distressed / Depressed                | 268 (44)     |
| SSQS <sup>^</sup>                     |              |
| Satisfied                             | 530(87)      |
| Dissatisfied                          | 80(3)        |

\*MSM/TG – Men who have sex with men/transgender, FSW – female sex workers, HIV- Human Immunodeficiency Virus., AIDS- Acquired immune deficiency syndrome, HTC-HIV Testing and Counselling, ^SSQS- The Social Support Questionnaire Score.

**Web-only table 3.** Factors associated with non-utilization of HIV Testing and Counselling (HTC) centres among Men having Sex with Men/Transgender using RDS weights

| Variables                                   |              |            | HTC not Utilised <sup>@</sup> | Adj PR <sup>**</sup> |
|---------------------------------------------|--------------|------------|-------------------------------|----------------------|
|                                             |              | N          | n(%) <sup>‡</sup>             |                      |
| <b>Total</b>                                |              | <b>400</b> | <b>221(55)</b>                |                      |
| <b>Demographic factors</b>                  |              |            |                               |                      |
| Age in years                                | 16-19        | 69         | 54(78)                        | 1.3(1.0-1.7)*        |
|                                             | 20-24        | 129        | 73(57)                        | 1.1(0.8-1.4)         |
|                                             | >25          | 202        | 94(47)                        | Ref                  |
| Educational Status                          | Illiterate   | 13         | 7(54)                         | -                    |
|                                             | Literate     | 387        | 214(55)                       | -                    |
| Marital Status                              | Unmarried    | 289        | 163(56)                       | -                    |
|                                             | Married      | 111        | 58(52)                        | -                    |
| <b>Behavioural</b>                          |              |            |                               |                      |
| Condom use at last sex                      | Yes          | 339        | 177(72)                       | Ref.                 |
|                                             | No           | 61         | 44(52)                        | 1.2(1.1-1.4)*        |
| Drinking Alcohol                            | Yes          | 323        | 186(58)                       | 1.1(0.9-1.3)         |
|                                             | No           | 77         | 35(45)                        | Ref.                 |
| <b>Structural</b>                           |              |            |                               |                      |
| Ever Participated in HIV awareness programs | Yes          | 185        | 62(34)                        | 2.2(1.3-3.7)*        |
|                                             | No           | 215        | 159(74)                       | Ref.                 |
| Physical assault in last year               | Yes          | 57         | 10(18)                        | 1.2(.8-1.7)          |
|                                             | No           | 343        | 211(62)                       | Ref.                 |
| Housing instability                         | Homeless     | 8          | 4(50)                         | -                    |
|                                             | Own home     | 75         | 42(56)                        | -                    |
|                                             | Rented       | 317        | 175(55)                       | -                    |
| Forced sex in last year                     | Yes          | 52         | 10(19)                        | 0.5(0.2-1.1)***      |
|                                             | No           | 348        | 211(61)                       | Ref.                 |
| Discrimination in Job                       | Yes          | 79         | 17(22)                        | Ref.                 |
|                                             | No           | 321        | 204(64)                       | 0.9(0.6-1.5)         |
| <b>Psychosocial factors</b>                 |              |            |                               |                      |
| Stigma towards HIV                          | Yes          | 253        | 138(54)                       | -                    |
|                                             | No           | 147        | 83(56)                        | -                    |
| Suicidal thought Ever                       | Yes          | 107        | 33(31)                        | 0.8(0.6-1.3)         |
|                                             | No           | 293        | 188(64)                       | Ref.                 |
| Depression <sup>#</sup>                     | Euthymic     | 220        | 121(59)                       | -                    |
|                                             | Distressed   | 83         | 49(53)                        | -                    |
|                                             | Depressed    | 97         | 51(55)                        | -                    |
| SSQS <sup>^</sup>                           | Satisfied    | 390        | 216(55)                       | -                    |
|                                             | Dissatisfied | 10         | 5(50)                         | -                    |

‡Unweighted descriptive statistics. For RDS-weighted estimates refer to web-only table 2; @Not utilised in last one year; \* p<0.05; \*\*\*p=0.07 \*\*Adjusted prevalence ratio using Poisson regression with robust variance estimates (enter method); factors with Unadjusted PR with p<0.2 included in model and collinearity checked; #Depression measured using a CES-D scale; ^SSQS- The Social Support Questionnaire Score.

1  
2  
3 Web-only box 1. Independent variables used in this study from the IBBS 2012 survey among  
4 FSW and MSM/TG to determine Uptake of HTC, Nepal.  
5  
6  
7

8 **Demographic Factors:** Age, Educational Status, Marital Status, Having dependent  
9

10 **Behavioural Factors:** Condom Use last sex, Ever inject drug, Drinking alcohol  
11  
12

13 **Psychosocial Factors:**

- 14 ✓ Among FSW: Stigma towards HIV, Suicidal thoughts Ever, Depression, The Social  
15 Support Questionnaire Score (SSQS)  
16
- 17 ✓ Among MSM/TG: Stigma towards HIV, Suicidal thoughts Ever, Depression, The  
18 Social Support Questionnaire Score (SSQS)  
19  
20  
21  
22  
23

24 **Structural Factors:**

- 25 ✓ Among FSW: Housing Instability, Experienced forced sex in last year, Ever  
26 participated in HIV programs, Police detention in last 6 months, Physical assault last  
27 year, Client refusal to pay after sex in last year  
28  
29
- 30 ✓ Among MSM/TG: Housing Instability, Ever participated in HIV programs, Physical  
31 assault last year, Experienced forced sex in last year, Discrimination in Job  
32  
33  
34  
35  
36  
37  
38  
39  
40  
41  
42  
43  
44  
45  
46  
47  
48  
49  
50  
51  
52  
53  
54  
55  
56  
57  
58  
59  
60

## STROBE Statement—checklist of items that should be included in reports of observational studies

|                      | Item No | Recommendation                                                                                                                                                                                                                                                                                                                                                                                                                                                         | Current paper                                                                                                                             |
|----------------------|---------|------------------------------------------------------------------------------------------------------------------------------------------------------------------------------------------------------------------------------------------------------------------------------------------------------------------------------------------------------------------------------------------------------------------------------------------------------------------------|-------------------------------------------------------------------------------------------------------------------------------------------|
| Title and abstract   | 1       | (a) Indicate the study's design with a commonly used term in the title or the abstract                                                                                                                                                                                                                                                                                                                                                                                 | Done. In abstract. Line 26                                                                                                                |
|                      |         | (b) Provide in the abstract an informative and balanced summary of what was done and what was found                                                                                                                                                                                                                                                                                                                                                                    | Done. Line 23-44                                                                                                                          |
| <b>Introduction</b>  |         |                                                                                                                                                                                                                                                                                                                                                                                                                                                                        |                                                                                                                                           |
| Background/rationale | 2       | Explain the scientific background and rationale for the investigation being reported                                                                                                                                                                                                                                                                                                                                                                                   | Done. Line 64-94                                                                                                                          |
| Objectives           | 3       | State specific objectives, including any pre-specified hypotheses                                                                                                                                                                                                                                                                                                                                                                                                      | Done. Line 95-97. There was no pre-specified hypothesis. We wanted to explore the risk factors for non-utilization of HIV testing centre. |
| <b>Methods</b>       |         |                                                                                                                                                                                                                                                                                                                                                                                                                                                                        |                                                                                                                                           |
| Study design         | 4       | Present key elements of study design early in the paper                                                                                                                                                                                                                                                                                                                                                                                                                | Done. Line 109-111                                                                                                                        |
| Setting              | 5       | Describe the setting, locations, and relevant dates, including periods of recruitment, exposure, follow-up, and data collection                                                                                                                                                                                                                                                                                                                                        | Done. Line 112-138                                                                                                                        |
| Participants         | 6       | (a) <i>Cohort study</i> —Give the eligibility criteria, and the sources and methods of selection of participants. Describe methods of follow-up<br><i>Case-control study</i> —Give the eligibility criteria, and the sources and methods of case ascertainment and control selection. Give the rationale for the choice of cases and controls<br><i>Cross-sectional study</i> —Give the eligibility criteria, and the sources and methods of selection of participants | Done. Line 139-158 (cross-sectional analytic study)                                                                                       |
|                      |         | (b) <i>Cohort study</i> —For matched studies, give matching criteria and number of exposed and unexposed<br><i>Case-control study</i> —For matched studies, give matching criteria and the number of controls per case                                                                                                                                                                                                                                                 |                                                                                                                                           |
| Variables            | 7       | Clearly define all outcomes, exposures, predictors, potential confounders, and effect modifiers. Give diagnostic criteria, if applicable                                                                                                                                                                                                                                                                                                                               | Done. Line 157-172                                                                                                                        |

|                                                                                                                |                              |    |                                                                                                                                                                                                                                                                                                                                                                                                                                                                                                                          |                                                                           |
|----------------------------------------------------------------------------------------------------------------|------------------------------|----|--------------------------------------------------------------------------------------------------------------------------------------------------------------------------------------------------------------------------------------------------------------------------------------------------------------------------------------------------------------------------------------------------------------------------------------------------------------------------------------------------------------------------|---------------------------------------------------------------------------|
| 1<br>2<br>3<br>4<br>5<br>6<br>7                                                                                | Data sources/<br>measurement | 8* | For each variable of interest, give sources of data and details of methods of assessment (measurement). Describe comparability of assessment methods if there is more than one group                                                                                                                                                                                                                                                                                                                                     | Done. Line 110-111 and 157-171. Comparability described in lines 183-190. |
| 8<br>9                                                                                                         | Bias                         | 9  | Describe any efforts to address potential sources of bias                                                                                                                                                                                                                                                                                                                                                                                                                                                                | Lines 183-190                                                             |
| 10                                                                                                             | Study size                   | 10 | Explain how the study size was arrived at                                                                                                                                                                                                                                                                                                                                                                                                                                                                                | Line 139-156                                                              |
| 11<br>12<br>13<br>14<br>15                                                                                     | Quantitative variables       | 11 | Explain how quantitative variables were handled in the analyses. If applicable, describe which groupings were chosen and why                                                                                                                                                                                                                                                                                                                                                                                             | Lines 173-190                                                             |
| 16<br>17<br>18<br>19<br>20<br>21<br>22<br>23<br>24<br>25<br>26<br>27<br>28<br>29<br>30<br>31<br>32<br>33<br>34 | Statistical methods          | 12 | (a) Describe all statistical methods, including those used to control for confounding<br>(b) Describe any methods used to examine subgroups and interactions<br>(c) Explain how missing data were addressed<br>(d) <i>Cohort study</i> —If applicable, explain how loss to follow-up was addressed<br><i>Case-control study</i> —If applicable, explain how matching of cases and controls was addressed<br><i>Cross-sectional study</i> —If applicable, describe analytical methods taking account of sampling strategy | Done. Line 173-190.<br>Lines 183-190.<br>Not applicable.<br>Lines 178-182 |
| 35                                                                                                             |                              |    | (e) Describe any sensitivity analyses                                                                                                                                                                                                                                                                                                                                                                                                                                                                                    | Not applicable.                                                           |

Continued on next page

1  
2  
3  
4  
5  
6  
7  
8  
9  
10  
11  
12  
13  
14  
15  
16  
17  
18  
19  
20  
21  
22  
23  
24  
25  
26  
27  
28  
29  
30  
31  
32  
33  
34  
35  
36  
37  
38  
39  
40  
41  
42  
43  
44  
45  
46  
47  
48  
49  
50  
51  
52  
53  
54  
55  
56  
57  
58  
59  
60

| <b>Results</b>    |     |                                                                                                                                                                                                              |                    |
|-------------------|-----|--------------------------------------------------------------------------------------------------------------------------------------------------------------------------------------------------------------|--------------------|
| Participants      | 13* | (a) Report numbers of individuals at each stage of study—eg numbers potentially eligible, examined for eligibility, confirmed eligible, included in the study, completing follow-up, and analysed            | Line 203-204       |
|                   |     | (b) Give reasons for non-participation at each stage                                                                                                                                                         | Not applicable     |
|                   |     | (c) Consider use of a flow diagram                                                                                                                                                                           | Not applicable     |
| Descriptive data  | 14* | (a) Give characteristics of study participants (eg demographic, clinical, social) and information on exposures and potential confounders                                                                     | Done. Line 204-207 |
|                   |     | (b) Indicate number of participants with missing data for each variable of interest                                                                                                                          | No missing data    |
|                   |     | (c) <i>Cohort study</i> —Summarise follow-up time (eg, average and total amount)                                                                                                                             | Not applicable     |
| Outcome data      | 15* | <i>Cohort study</i> —Report numbers of outcome events or summary measures over time                                                                                                                          |                    |
|                   |     | <i>Case-control study</i> —Report numbers in each exposure category, or summary measures of exposure                                                                                                         |                    |
|                   |     | <i>Cross-sectional study</i> —Report numbers of outcome events or summary measures                                                                                                                           | Done. 205-206      |
| Main results      | 16  | (a) Give unadjusted estimates and, if applicable, confounder-adjusted estimates and their precision (eg, 95% confidence interval). Make clear which confounders were adjusted for and why they were included | Lines 209-214      |
|                   |     | (b) Report category boundaries when continuous variables were categorized                                                                                                                                    | Lines 162-166      |
|                   |     | (c) If relevant, consider translating estimates of relative risk into absolute risk for a meaningful time period                                                                                             | Not applicable     |
| Other analyses    | 17  | Report other analyses done—eg analyses of subgroups and interactions, and sensitivity analyses                                                                                                               | Not applicable     |
| <b>Discussion</b> |     |                                                                                                                                                                                                              |                    |
| Key results       | 18  | Summarise key results with reference to study objectives                                                                                                                                                     | Done. Line 239-248 |
| Limitations       | 19  | Discuss limitations of the study, taking into account sources of potential bias or imprecision. Discuss both direction and magnitude of any potential bias                                                   | Done. Line 300-306 |
| Interpretation    | 20  | Give a cautious overall interpretation of                                                                                                                                                                    | Done. Line 309-312 |

1  
2 results considering objectives, limitations,  
3 multiplicity of analyses, results from similar  
4 studies, and other relevant evidence

---

5 Generalisability 21 Discuss the generalisability (external Done. Line 299-300  
6 validity) of the study results

---

7  
8 **Other information**

---

9 Funding 22 Give the source of funding and the role of the Done. Line 315-333  
10 funders for the present study and, if  
11 applicable, for the original study on which  
12 the present article is based

13  
14  
15 \*Give information separately for cases and controls in case-control studies and, if applicable, for exposed and  
16 unexposed groups in cohort and cross-sectional studies.  
17

18  
19 **Note:** An Explanation and Elaboration article discusses each checklist item and gives methodological background and  
20 published examples of transparent reporting. The STROBE checklist is best used in conjunction with this article (freely  
21 available on the Web sites of PLoS Medicine at <http://www.plosmedicine.org/>, Annals of Internal Medicine at  
22 <http://www.annals.org/>, and Epidemiology at <http://www.epidem.com/>). Information on the STROBE Initiative is  
23 available at [www.strobe-statement.org](http://www.strobe-statement.org).  
24  
25  
26  
27  
28  
29  
30  
31  
32  
33  
34  
35  
36  
37  
38  
39  
40  
41  
42  
43  
44  
45  
46  
47  
48  
49  
50  
51  
52  
53  
54  
55  
56  
57  
58  
59  
60

# BMJ Open

## Why don't key populations access HIV testing and counselling centres in Nepal? Findings based on national surveillance survey

|                                 |                                                                                                                                                                                                                                                                                                                                                                                                                                                                                                      |
|---------------------------------|------------------------------------------------------------------------------------------------------------------------------------------------------------------------------------------------------------------------------------------------------------------------------------------------------------------------------------------------------------------------------------------------------------------------------------------------------------------------------------------------------|
| Journal:                        | <i>BMJ Open</i>                                                                                                                                                                                                                                                                                                                                                                                                                                                                                      |
| Manuscript ID                   | bmjopen-2017-017408.R3                                                                                                                                                                                                                                                                                                                                                                                                                                                                               |
| Article Type:                   | Research                                                                                                                                                                                                                                                                                                                                                                                                                                                                                             |
| Date Submitted by the Author:   | 23-Aug-2017                                                                                                                                                                                                                                                                                                                                                                                                                                                                                          |
| Complete List of Authors:       | Shrestha, Rachana; Public Health and Environment Research Center Philip, Sairu; Government T.D Medical College, Alappuzha, Kerala, India, Community Medicine<br>Shewade, Hemant; International Union Against Tuberculosis and Lung Disease, South-East Asia Regional Office, Operational Research Rawal, Bir; National Centre for AIDS & STD Control, Ministry of Health Deuba, Keshab; Public Health and Environment Research Center, ; Karolinska Institutet, Department of Public Health Sciences |
| <b>Primary Subject Heading</b>: | Public health                                                                                                                                                                                                                                                                                                                                                                                                                                                                                        |
| Secondary Subject Heading:      | HIV/AIDS, Public health, Sexual health                                                                                                                                                                                                                                                                                                                                                                                                                                                               |
| Keywords:                       | HIV & AIDS < INFECTIOUS DISEASES, Sex workers, MSM/TG, HIV Testing and Counselling                                                                                                                                                                                                                                                                                                                                                                                                                   |
|                                 |                                                                                                                                                                                                                                                                                                                                                                                                                                                                                                      |

SCHOLARONE™  
Manuscripts

Only



1  
2  
3 1 **Why don't key populations access HIV testing and counselling centres in**  
4  
5 2 **Nepal? Findings based on national surveillance survey**  
6  
7

8  
9 3 **Authors:** Rachana Shrestha<sup>1\*</sup>, Sairu Philip<sup>2</sup>, Hemant Deepak Shewade<sup>3</sup>, Bir Rawal<sup>4</sup>, Keshab  
10 4 Deuba<sup>4,5</sup>  
11

12  
13  
14 5 **Affiliations:**<sup>1</sup>Public Health and Environment Research Center, Kathmandu Nepal,  
15  
16 <sup>2</sup>Government T.D Medical College, Alappuzha, Kerala, India, <sup>3</sup>International Union Against  
17 6 Tuberculosis and Lung Disease (The Union), South-East Asia Office, New Delhi,  
18 7 India, <sup>4</sup>National Centre for AIDS and STD Control (NCASC), Ministry of Health, Kathmandu,  
19 8 Nepal, <sup>5</sup>Department of Public Health Sciences, Karolinska Institutet, Stockholm, Sweden.  
20  
21  
22  
23  
24  
25  
26  
27  
28

29 11 \*Authors responsible for the correspondence: Rachana Shrestha, Public Health and  
30 12 Environment Research Center (PERC), Sanepa Lalitpur Nepal-44600  
31 13 Web: <http://percnepal.org/home/index> Tel: +977 9860999428;  
32 14 Email: [rachana.shrestha@percnepal.org](mailto:rachana.shrestha@percnepal.org)  
33  
34  
35  
36  
37  
38  
39

40 16 **Running title:** IBBS 2012Nepal: factors for non-utilization of HTC  
41  
42

43 17 **Word count:** Abstract -246; Main text - 2577; Tables – 2; Figure – 1; Web-only table – 1;  
44 18 Web-only table – 2; Web-only table – 3; Web-only box - 1  
45  
46  
47

48 19 **Keywords:** Key populations; HIV voluntary testing and counselling; MSM; Transgender;  
49 20 FSW; SORT IT; Nepal  
50  
51  
52  
53  
54  
55  
56  
57  
58  
59  
60

1  
2  
3 **ABSTRACT**  
4  
5

6 **Objectives:** To assess the demographic, behavioural, psychosocial and structural factors  
7  
8 associated with non-utilization of HIV testing and counselling centres (HTC) by female sex  
9  
10 workers (FSW) and men who have sex with men/ transgender (MSM/TG).  
11

12 **Methods:** This study involved a cross-sectional design. We used the national surveillance  
13  
14 survey data of 2012 which included 610 FSW and 400 MSM/TG recruited randomly from 22  
15  
16 and three districts of Nepal respectively. Adjusted prevalence ratio (aPR) and 95% confidence  
17  
18 interval (CI) using modified Poisson regression was used to assess and infer the association  
19  
20 between outcome (non-utilization of HTC in last year) and independent variables.  
21  
22

23 **Results:** Non-utilization of HTC in last one year was 54% for FSW and 55% for MSM/TG.  
24  
25 The significant factors for non-utilization of HTC among FSW were: depression  
26  
27 [aPR=1.4(1.1-1.6)], injectable drug abuse (ever) [aPR=1.4(1.1-1.8)], participation (ever) in  
28  
29 HIV awareness programmes [aPR=1.2 (1.0-1.4)], experience of forced sex in previous year  
30  
31 [aPR=1.1 (1.0-1.3)] and absence of dependents in the family [aPR=1.1(1.0-1.3)]. Non-  
32  
33 utilisation of HTC among MSM/TG had significant association with age 16-19 years  
34  
35 [aPR=1.4(1.1-1.7)], non-condom use [aPR=1.2 (1.0-1.4)], participation (ever) in HIV  
36  
37 awareness programs [aPR=1.6 (1.3-2.0)], physical assault in previous year [aPR=1.8(1.0-  
38  
39 3.1)], experience of forced sex in previous year [aPR=0.5(0.3-0.9)]  
40  
41

42 **Conclusion:** Although limited by cross-sectional design, we found many programmatically  
43  
44 relevant findings. Creative strategies should be envisaged for effective behavioural change  
45  
46 communication to improve access to HIV testing. Psychosocial and structural interventions  
47  
48 should be integrated with HIV prevention programmes to support key populations in  
49  
50 accessing HIV testing.  
51  
52

53  
54  
55  
56  
57  
58  
59  
60

1  
2  
3 47  
4  
5  
6 48  
7  
8  
9  
10 49  
11  
12  
13 50  
14  
15  
16 51  
17  
18  
19  
20 52  
21  
22  
23 53  
24  
25  
26 54  
27  
28  
29  
30 55  
31  
32  
33 56  
34  
35  
36 57  
37  
38  
39  
40 58  
41  
42  
43 59  
44  
45  
46 60  
47  
48  
49  
50 61  
51  
52  
53 62  
54  
55  
56  
57 63  
58  
59  
60

**Summary – strengths and limitations of this study**

1. Psychosocial and structural factors were assessed for the first time in the national surveillance survey of 2012.
2. Social desirability bias, recall bias due to the assessment of past exposures might have influenced the self-reported variables.
3. The cross-sectional design of study limits to conclude causality.

## 64 INTRODUCTION

65 Globally, at the end of 2015, an estimated 36.7 million people were living with HIV of  
66 which 47% did not know their HIV status and hence were deprived of antiretroviral therapy  
67 and care[1]. According to UNAIDS 90-90-90 target, by 2020, 90% of all individuals living  
68 with HIV should know their HIV status, 90% of all individuals with diagnosed HIV infection  
69 should receive sustained antiretroviral therapy, and 90% of all individuals receiving  
70 antiretroviral therapy should have viral suppression. By 2030 the AIDS epidemic will come to  
71 an end as public health threat if these three targets are achieved[2].

72 The key population are those who have a high risk of acquiring or transmitting HIV.  
73 Global studies have shown that key populations are 13 to 22 times more likely to be infected  
74 with HIV than the general population[3]. Key population includes female sex workers (FSW)  
75 and men who have sex with men (MSM)/ transgender (TG)[4]. FSW and MSM/TG are 13-14  
76 times more likely to be infected with HIV than the general population[3].

77 World Health Organization (WHO) recommended integrated biological and  
78 behavioural surveillance (IBBS) survey to monitor HIV prevalence and risk behaviours  
79 among key populations. In the late 90s, IBBS was started by Government of Nepal as part of  
80 response plan against HIV/AIDS epidemic[5]. HIV testing and counselling (HTC) is the entry  
81 point for HIV care services in Nepal and are provided free of cost to all. HTC is a critical  
82 intervention in achieving the first 90, i.e., people living with HIV should know their HIV  
83 status. Though the first step is crucial in identifying people living with HIV, the retention in  
84 care of PLHIV in second 90 and third 90 is equally necessary to maximise the treatment and  
85 prevention benefits of antiretroviral therapy[6,7]. National consolidated guidelines for  
86 preventing and treating HIV in Nepal had recommended various approaches for maximising  
87 HIV testing in both facility and community-based settings[4,5]. Different surveillance surveys

1  
2  
3 88 conducted in Nepal found that the non-utilization of HTC was low, i.e., around 50%in FSW  
4  
5 89 and MSM/TG[8].  
6  
7

8 90 There was a substantial decline in the proportion of FSW visiting HTC in 2016  
9  
10 91 compared to 2012 as revealed by IBBS 2016 [9]. Among FSW, decreasing trend in HIV  
11  
12 92 prevalence was accompanied by an increasing trend in lack of comprehensive knowledge  
13  
14 93 regarding HIV [9,10]. The UNAIDS target of 90% assessment of HIV status by 2020 might  
15  
16 94 not be reached in Nepal unless factors associated with non-utilization of HTC are identified  
17  
18 95 and addressed [2,11,12].  
19  
20  
21

22 96 Psychosocial variables like distress/ depression were included only in IBBS 2012  
23  
24 97 survey and were found to be high(40-50 percent) of the key population (people who inject  
25  
26 98 drugs, FSW and MSM/TG) studied[10,13,14].Different studies demonstrate that the  
27  
28 99 psychosocial problems (depression, drug abuse and suicidality) increase the likelihood of  
29  
30 100 HIV-related risk behaviours among FSW and MSM/TG in Nepal [15,16]. Studies conducted  
31  
32 101 outside of Nepal (India and USA) among key populations (MSM/TG and FSW) found that the  
33  
34 102 psychosocial (depression, substance abuse, violence) and structural factors not only increase  
35  
36 103 their risk behaviours but also lowers the uptake of behavioural interventions.[17–19]. The  
37  
38 104 identification of effects of psychosocial and structural factors in the uptake of HTC would  
39  
40 105 help us to improve existing challenges of reaching key populations in Nepal. However such  
41  
42 106 evidence is very limited in Nepal. Therefore using the IBBS 2012 data, we aimed to  
43  
44 107 determine the demographic, behavioural, psychosocial and structural risk factors associated  
45  
46 108 with non-utilization of HTC in last one-year by FSW and MSM/TG in Nepal.  
47  
48  
49  
50  
51

52 109  
53  
54

55 110  
56  
57

58 111  
59  
60

1  
2  
3 112 **METHODS**  
4  
5

6 113 **Study design**  
7

8  
9 114 This study was a cross-sectional study involving secondary data of FSW and MSM/TG  
10  
11 115 collected from IBBS survey of 2012 in Nepal.  
12

13  
14 116 **Setting**  
15

16  
17 117 Nepal, with a population of 27 million, is a low-middle income, a beautiful landlocked  
18  
19 118 country in South-East Asia[20]. It shares borders with China in the north and India to the  
20  
21 119 south, east and west. Nepal is divided into 75 districts and consists of a Himalayan  
22  
23 120 mountainous region in the north and open terrain (*Terai* in local language) in the south. HTC  
24  
25 121 service was first started in Nepal in 1995 by the National Programme for AIDS and Sexually  
26  
27 122 Transmitted Disease. There are over 235 HTC service sites in Nepal as of July 2016.  
28  
29

30 123 *HTC in Nepal*  
31

32  
33 124 In Nepal, HTC is the entry point for HIV prevention services whose primary aim is to  
34  
35 125 identify people living with HIV and link them to treatment. It is voluntary and provided free  
36  
37 126 of cost. Health facilitators should maintain confidentiality and obtain informed consent during  
38  
39 127 pre and post-test counselling. According to national guidelines, key populations are expected  
40  
41 128 to visit HTC in every 6-12 months[5]. Besides that, community-based interventions are also  
42  
43 129 prioritised in which peer educators and outreach workers are mobilised in the community.  
44  
45 130 Peer educators are volunteers who convey crucial information (proper condom use, HIV  
46  
47 131 testing, etc.) to key populations in informal (cruising areas like bus park or public park) and  
48  
49 132 formal setting (drop-in centres). They also distribute condoms, safe needles/ syringes or aware  
50  
51 133 them about available treatment, care and support services.  
52  
53

54  
55  
56 134  
57  
58  
59  
60

1  
2  
3 135 *IBBS 2012 Survey, Nepal*

4  
5  
6 136 National Centre for AIDS and STD Control (NCASC), Nepal, conducted two separate  
7  
8 137 cross-sectional IBBS surveys between September and November 2012 for FSW and  
9  
10 138 MSM/TG respectively. FSW were defined as “*women aged 16 years and above reporting to*  
11  
12 139 *have been paid in cash or kind for sex with a male within the last six months.*” MSM/TG were  
13  
14 140 defined as “*men aged 16 years or above who have had sexual relations (either oral or anal)*  
15  
16 141 *with another male in the 12 months preceding the survey.*”(7). A survey among FSW was  
17  
18 142 conducted in 22 *Terai* highway districts and for MSM/TG in three districts of Kathmandu  
19  
20 143 valley (Kathmandu, Lalitpur and Bhaktapur) (**figure 1**).

#### 21 22 23 24 144 **Study population and sampling**

25  
26  
27 145 The FSW were recruited using two-stage cluster sampling; stage 1 was the selection of  
28  
29 146 clusters, and stage 2 was the random selection of an equal number of participants from each  
30  
31 147 selected cluster to ensure a self-weighted sample. A cluster was defined as having at least 30  
32  
33 148 sex workers in that area; those with fewer than 30 sex workers were merged with nearby  
34  
35 149 locations to form a cluster. To identify clusters, mapping was performed with the support of  
36  
37 150 local non-governmental organisations to determine areas where sex work is common and  
38  
39 151 noting the estimated number of possible survey participants in each area. Seventy clusters out  
40  
41 152 of a total of 401 clusters were selected based on probability proportionate to size (PPS).

42  
43  
44  
45  
46 153 The MSM were recruited using respondent driven sampling (RDS) in three districts of  
47  
48 154 Kathmandu valley. To begin with, a total of eight MSM/TG were recruited as seed. Those  
49  
50 155 seeds were informed about survey protocols and procedure and were encouraged to recruit  
51  
52 156 other eligible individuals from their social networks randomly to participate in the survey.  
53  
54 157 These initial seeds were provided three coupons to pass to their peers who are eligible to  
55  
56 158 participate in the survey.

1  
2  
3 159 Detailed methodology and sampling strategies for IBBS surveys have been described  
4  
5 160 previously [10,13–15].  
6  
7  
8 161

### 11 162 **Data variables for the present study**

14 163 IBBS survey included information on behavioural factors like uptake of  
15  
16 164 interventions for HIV, demographic, behavioural, psychosocial and structural  
17  
18 165 variables[10,13,14]. Structural factors included environmental/context conditions which  
19  
20 166 were outside the control of the individual, but which could influence his/her perceptions,  
21  
22 167 behaviour and health [21]. Psychosocial variables (social support and depression) were  
23  
24 168 assessed using social support questionnaire short form (SSQS) and centre for  
25  
26 169 epidemiological studies depression (CES-D) scale respectively. The CES-D tool showed  
27  
28 170 high reliability and validity in assessing depression in diverse groups such as PLHIV,  
29  
30 171 women and MSM with Cronbach's alpha  $\geq 0.85$  and comparative fit indices more than  
31  
32 172 0.90[22]. The CES-D is extensively normed and validated tool[23]. Similarly the reliability  
33  
34 173 and construct validity of scale SSQS reported high ( $>0.90$ ) by different studies [24,25].  
35  
36 174

37  
38  
39  
40 175 Median score of  $<5$  in SSQS scale was interpreted as 'dissatisfied with available social  
41  
42 176 support'. CES-D scale more than 16-21 and  $\geq 22$  were to classify distress and depression  
43  
44 177 respectively. We also assessed suicidality under psychosocial-related variables. Prevalence of  
45  
46 178 demographic, behavioural, psychosocial and structural factors have been summarised in **web-**  
47  
48 179 **only tables 1 and 2.**

51  
52  
53 180 A self-reported visit to an HTC facility in past year by the FSW and MSM/TG was  
54  
55 181 chosen as the outcome variable. The outcome variable assessed by asking 'Have you visited  
56  
57 182 (Yes vs. No) any HTC centers in the last 12 months?' (Reasons for visiting: pre-post  
58  
59  
60



1  
2  
3 183 HIV/AIDS test counselling, information on HIV/AIDS window period, HIV/AIDS test result,  
4  
5 184 counselling on using condom correctly in each sexual intercourse). In addition to reasons  
6  
7 185 above, discussion on safe injecting behaviour was also one of the self-reported reasons among  
8  
9 186 PWID for visiting HTC. The independent variables (demographic, behavioural, psychosocial  
10  
11 187 and structural risk variables) selected in this study have been described in web-only box 1.  
12  
13

## 14 15 188 **Analysis and statistics**

16  
17  
18 189 Data analysis was done separately for FSW and MSM/TG. Data was analysed using  
19  
20 190 STATA (version 12.1 STATA Corp., College Station, TX, USA).Categorical variables were  
21  
22 191 described using frequency and proportions. The unadjusted and adjusted analysis was  
23  
24 192 performed separately for FSW and MSM/TG to assess the association of factors with the  
25  
26 193 outcome variable (not utilising HTC in last one year). All the RDS-related descriptive output  
27  
28 194 were adjusted to represent the structure of the study population (MSM/TG) which was based  
29  
30 195 on information regarding who recruited whom, and the relative size of the respondent's  
31  
32 196 network using the Volz–Heckathorn estimator (RDS II) (20).To assess the network size  
33  
34 197 among MSM/TG, the following question was asked: “How many other MSM/TG do you  
35  
36 198 know who also know you well? (Knowing someone is defined as being able to contact them  
37  
38 199 and having had to contact with them in the past 12 months).” RDS-adjusted values presented  
39  
40 200 in web-only table 1. Convergence plot for outcome variable is shown in web-only figure  
41  
42 201 1.Adjustment for clustering of two-stage cluster sampling was not required in FSW data as it  
43  
44 202 was a self-weighted sample.  
45  
46  
47  
48

49  
50 203 Bivariate associations between each independent variable and non-utilization of HTC  
51  
52 204 were calculated using variance inflation factor after assessment for multicollinearity.  
53  
54 205 Variables with a p-value of <0.2 in the bivariate analysis were included in the regression  
55  
56 206 model (enter method). Adjusted prevalence ratios (aPR)with 95% confidence intervals  
57  
58  
59  
60

1  
2  
3 207 (CI) were calculated by fitting a Poisson regression with robust variance estimates. The  
4  
5 208 variables included in multivariate model (adjusted prevalence ratio) for FSW were age group,  
6  
7 209 educational status, condom use at last sex, ever inject drugs, ever participated in HIV  
8  
9 210 awareness program, physical assault in last year, forced sex in last year, having dependents,  
10  
11 211 police detention in last 6 months, stigma towards HIV and distress/depression. The variables  
12  
13 212 included in adjusted prevalence ratio for MSM/TG were an age group, condom use at last sex,  
14  
15 213 drinking alcohol, ever participated in HIV awareness programme, physical assault in last year,  
16  
17 214 forced sex in last year, and discrimination in job and suicidal thought 'ever'.  
18  
19

20  
21  
22 215 Initially, we used the log-binomial model to assess the association between  
23  
24 216 independent and outcome variable of interest. However, the log-binomial model fails to  
25  
26 217 converge. To overcome the effects of failed convergence, we have used the Poisson  
27  
28 218 regression with robust variance estimates as recommended by the Tyler et al.[26]. Poisson  
29  
30 219 regression with robust variance can be used as an alternative of logistic regression and also  
31  
32 220 provides accurate estimates in the cross-sectional study with binary outcome of interest[27].  
33  
34 221 We have calculated the prevalence ratio because it is easy to interpret than the odds ratio. We  
35  
36 222 also assessed associations between outcome and independent variables via Poisson model  
37  
38 223 using individualised RDS weights (web-only table 3).  
39  
40

41  
42 224

#### 43 44 225 **Ethical Considerations**

45  
46 226 Ethics approval for IBBS survey 2012 was given by the Nepal Health Research  
47  
48 227 Council (NHRC), Kathmandu, Nepal. Approval for the analysis of secondary data for this  
49  
50 228 study was taken in 2016 from Ethics Advisory Group, the International Union Against  
51  
52 229 Tuberculosis and Lung Disease (The Union), Paris, France. Administrative approval was also  
53  
54 230 received from NCASC and Public Health and Environment Research Center (PERC) Nepal.  
55  
56  
57  
58  
59  
60

1  
2  
3 231 Waiver of informed consent was sought and approved by the ethics committee as this study  
4  
5 232 involved analysis of secondary data.  
6  
7

## 8 233 **RESULTS**

9

10  
11 234 IBBS survey 2012 included 610 FSW with the response rate among FSW was 88.9%.  
12  
13 235 The non-responders were replaced by the randomly selected another FSW of the same cluster.  
14  
15 236 The HIV prevalence was 1 percent among FSW. The proportion of FSW in the age group 16  
16  
17 237 to 19 was 13.9%. The prevalence of non-utilization of HTC in last one year was 54% among  
18  
19 238 FSW. More than half FSW(59%) were married, 24% of them were divorced or separated.  
20  
21 239 Two-third (68%) of FSW were literate (Table 1 and web-only table 2).  
22  
23

24  
25 240 IBBS survey 2012 included 400 MSM/TG, and we did not record non-response among  
26  
27 241 MSM/TG because of nature of sampling technique, i.e., study participants enrol the other  
28  
29 242 possible participants in the study. The HIV prevalence was 3.3 percent among MSM/TG. The  
30  
31 243 proportion of MSM/TG in the age group 16 to 19 was 17.2%. Non-utilization of HTC in last  
32  
33 244 one year was 55% for MSM/TG. The majority of the MSM/TG were unmarried (72%)  
34  
35 245 whereas very few of them were illiterate (3%). Other characteristics of the FSW and MSM/TG  
36  
37 246 are presented in web-only tables 1 and 2.  
38  
39

40  
41  
42 247 The factors associated with non-utilisation of HTC in last one year among FSW and  
43  
44 248 MSM/TG are summarised in **Table 1** and **Table 2** respectively. In multivariable analysis, the  
45  
46 249 association between non-utilisation of HTC and distress/depression remained significant.  
47  
48 250 FSW experiencing distress (APR: 1.4, 95% CI: 1.1–1.5) and depression (APR: 1.4, 95% CI:  
49  
50 251 1.1–1.6) were more likely to non-utilization of HTC in the past year. Similarly FSW who  
51  
52 252 were injecting drugs (ever) (APR: 1.4, 95% CI: 1.1–1.8), ever participated in HIV awareness  
53  
54 253 programmes (APR: 1.2, 95% CI: 1.0–1.4), or no dependents in the family (APR: 1.1, 95% CI:  
55  
56 254 1.0–1.3) were more likely to non-utilization of HTC. FSW who experienced forced sex (APR:  
57  
58  
59  
60

1  
2  
3 255 1.1, 95% CI: 1.0–1.3) in the last 12 months were also more likely to non-utilization of HTC  
4  
5 256 (Table 1). episode

6  
7  
8 257 MSM/TG who were adolescents aged 16-19 years(APR: 1.4, 95% CI: 1.1–1.7) and  
9  
10 258 experienced physical assault(APR: 1.8, 95% CI: 1.0–3.1) were more likely to non-utilization  
11  
12 259 of HTC. However, MSM/TG who experienced forced sex(APR: 0.5, 95% CI: 0.3–0.9) were  
13  
14 260 less likely to non-utilization of HTC. MSM/TG who did not use condom during their last sex  
15  
16 261 (APR: 1.2, 95% CI: 1.0–1.4) or participated in HIV awareness programs (APR: 1.6, 95% CI:  
17  
18 262 1.3–2.0) were more likely to non-utilization of HTC (Table 2).

19  
20  
21  
22 263 We also assessed the association between independent variables and outcome variable via  
23  
24 264 Poisson model using individualised RDS weights. But not much variation was observed in  
25  
26 265 the results of the weighted and unweighted analysis (web-only table 3).

27  
28  
29  
30 266 **Table 1.** Factors associated with non-utilization of HIV Testing and Counselling (HTC)  
31 267 centres among female sex workers surveyed under Integrated Biological and Behavioural  
32 268 Surveillance Survey, 2012, Nepal

| Variables                          |                        | Total<br>N | HTC not<br>Utilised <sup>@</sup><br>n(%) | Adj PR**      |
|------------------------------------|------------------------|------------|------------------------------------------|---------------|
| <b>Total</b>                       |                        | <b>610</b> | <b>330(54)</b>                           |               |
| <b>Demographic</b>                 |                        |            |                                          |               |
| Age in years                       | 16-19                  | 85         | 51 (60)                                  | 1.0 (0.8-1.2) |
|                                    | 20-24                  | 130        | 73(56)                                   | 1.0 (0.7-1.2) |
|                                    | >25                    | 395        | 206 (52)                                 | Ref.          |
| Educational Status                 | Illiterate             | 196        | 98 (50)                                  | 0.9(0.7-1.0)  |
|                                    | Literate               | 414        | 232 (56)                                 | Ref.          |
| Marital Status                     | Married                | 360        | 197 (55)                                 | Ref           |
|                                    | Unmarried              | 102        | 60 (59)                                  | -             |
|                                    | Separated/<br>Divorced | 148        | 73 (49)                                  | -             |
| Having dependents                  | Yes                    | 341        | 169 (50)                                 | Ref.          |
|                                    | No                     | 269        | 161 (60)                                 | 1.1(1.0-1.3)* |
| <b>Behavioural</b>                 |                        |            |                                          |               |
| Condom use at last sex             | Yes                    | 461        | 256(56)                                  | Ref.          |
|                                    | No                     | 149        | 74(32)                                   | 0.9(0.7-1.0)  |
| Ever inject drugs                  | Yes                    | 40         | 29(73)                                   | 1.4(1.1-1.8)* |
|                                    | No                     | 570        | 301(53)                                  | Ref.          |
| <b>Structural</b>                  |                        |            |                                          |               |
| Ever participated in HIV awareness | Yes                    | 169        | 102(52)                                  | 1.2(1.0-1.4)* |

|                                    |              |     |          |               |
|------------------------------------|--------------|-----|----------|---------------|
| programs                           | No           | 441 | 228(60)  | Ref.          |
| Physical assault in last year      | Yes          | 81  | 36 (44)  | 0.8 (0.6-1.0) |
|                                    | No           | 529 | 294 (56) | Ref.          |
| Housing Instability                | Homeless     | 15  | 6 (40)   | -             |
|                                    | Own home     | 320 | 169 (53) | -             |
|                                    | Rented       | 275 | 155 (56) |               |
| Forced sex in last year            | Yes          | 125 | 84 (67)  | 1.1(1.0-1.3)* |
|                                    | No           | 485 | 246 (51) | Ref.          |
| Police detention in last 6 months  | Yes          | 81  | 37 (46)  | 0.8(0.6-1.0)  |
|                                    | No           | 529 | 293 (55) | Ref.          |
| Client refusal to pay in last year | Yes          | 153 | 89 (58)  | -             |
|                                    | No           | 457 | 241 (53) | -             |
| <b>Psychosocial</b>                |              |     |          |               |
| Stigma towards HIV                 | Yes          | 295 | 168(57)  | 1.0(0.9-1.2)  |
|                                    | No           | 315 | 162(51)  | Ref.          |
| Suicidal thoughts (Ever)           | Yes          | 210 | 117(56)  | -             |
|                                    | No           | 399 | 212 (53) | -             |
| Depression <sup>#</sup>            | Euthymic     | 342 | 159 (46) | Ref.          |
|                                    | Distressed   | 156 | 100 (64) | 1.4(1.1-1.5)* |
|                                    | Depressed    | 112 | 71 (63)  | 1.4(1.1-1.6)* |
| SSQS <sup>^</sup>                  | Satisfied    | 530 | 289(55)  | -             |
|                                    | Dissatisfied | 80  | 41(51)   | -             |

269 @Not utilised in last one year; \* p<0.05; \*\*Adjusted prevalence ratio using Poisson regression with robust  
 270 variance estimates (enter method); factors with Unadjusted PR with p<0.2 included in the model and collinearity  
 271 checked; <sup>#</sup>Depression measured using a CES-D scale; <sup>^</sup>SSQS- The Social Support Questionnaire Score.  
 272

273

274 **Table 2.** Factors associated with non-utilization of HIV Testing and Counselling (HTC)  
 275 centres among Men having Sex with Men/Transgender surveyed under Integrated Biological  
 276 and Behavioural Surveillance Survey, 2012, Nepal

| Variables                                   |            | HTC not Utilised <sup>@</sup> |                   | Adj PR**      |
|---------------------------------------------|------------|-------------------------------|-------------------|---------------|
|                                             |            | N                             | n(%) <sup>‡</sup> |               |
| <b>Total</b>                                |            | <b>400</b>                    | <b>221(55)</b>    |               |
| <b>Demographic factors</b>                  |            |                               |                   |               |
| Age in years                                | 16-19      | 69                            | 54(78)            | 1.4(1.1-1.7)* |
|                                             | 20-24      | 129                           | 73(57)            | 1.1(0.9-1.4)  |
|                                             | >25        | 202                           | 94(47)            | Ref           |
| Educational Status                          | Illiterate | 13                            | 7(54)             | -             |
|                                             | Literate   | 387                           | 214(55)           | -             |
| Marital Status                              | Unmarried  | 289                           | 163(56)           | -             |
|                                             | Married    | 111                           | 58(52)            | -             |
| <b>Behavioural</b>                          |            |                               |                   |               |
| Condom use at last sex                      | Yes        | 339                           | 177(72)           | Ref.          |
|                                             | No         | 61                            | 44(52)            | 1.2(1.0-1.4)* |
| Drinking Alcohol                            | Yes        | 323                           | 186(58)           | 1.2(0.9-1.5)  |
|                                             | No         | 77                            | 35(45)            | Ref.          |
| <b>Structural</b>                           |            |                               |                   |               |
| Ever Participated in HIV awareness programs | Yes        | 185                           | 62(34)            | 1.6(1.3-2.0)* |
|                                             | No         | 215                           | 159(74)           | Ref.          |
| Physical assault in last year               | Yes        | 57                            | 10(18)            | 1.8(1.0-3.1)* |
|                                             | No         | 343                           | 211(62)           | Ref.          |

|                             |              |     |         |               |
|-----------------------------|--------------|-----|---------|---------------|
| Housing instability         | Homeless     | 8   | 4(50)   | -             |
|                             | Own home     | 75  | 42(56)  | -             |
|                             | Rented       | 317 | 175(55) | -             |
| Forced sex in last year     | Yes          | 52  | 10(19)  | 0.5(0.3-0.9)* |
|                             | No           | 348 | 211(61) | Ref.          |
| Discrimination in Job       | Yes          | 79  | 17(22)  | Ref.          |
|                             | No           | 321 | 204(64) | 1.3(0.8-2.2)  |
| <b>Psychosocial factors</b> |              |     |         |               |
| Stigma towards HIV          | Yes          | 253 | 138(54) | -             |
|                             | No           | 147 | 83(56)  | -             |
| Suicidal thought Ever       | Yes          | 107 | 33(31)  | 0.7(0.5-1.0)  |
|                             | No           | 293 | 188(64) | Ref.          |
| Depression <sup>#</sup>     | Euthymic     | 220 | 121(59) | -             |
|                             | Distressed   | 83  | 49(53)  | -             |
|                             | Depressed    | 97  | 51(55)  | -             |
| SSQS <sup>^</sup>           | Satisfied    | 390 | 216(55) | -             |
|                             | Dissatisfied | 10  | 5(50)   | -             |

277 **¥Unweighted descriptive statistics. For RDS-weighted estimates refer to web-only table 3; @Not utilised in**  
 278 **last one year; \* p<0.05; \*\*Adjusted prevalence ratio using Poisson regression with robust variance estimates**  
 279 **(enter method); factors with Unadjusted PR with p<0.2 included in model and collinearity checked;<sup>#</sup>Depression**  
 280 **measured using a CES-D scale; <sup>^</sup>SSQS- The Social Support Questionnaire Score.**

## 282 DISCUSSION

283 In IBBS 2012 survey, in addition to individual level variables, psychosocial and  
 284 structural factors were added. To the best of our knowledge, this study is the first to explore  
 285 the relation of psychosocial and structural factors with HTC non-utilization among FSW and  
 286 MSM/TG in Nepal. The uptake of HTC was low (around 55%) among MSM/ TG in Nepal  
 287 which is consistent with the findings of studies conducted in Assam and Andra Pradesh India,  
 288 Zhejiang province China and Bangkok Thailand[28–31].Our study also demonstrates a low  
 289 level of uptake of HTC among PWID in Nepal which is even lower (33%) among PWID of  
 290 Manipur and Nagaland in India[32]. The current scenario suggests that the low uptake of HTC  
 291 among MSM/TG and PWID not only challenge the timely identification and linking them to  
 292 treatment to improve their health but also increase the risk of secondary transmission from  
 293 HIV-infected MSM/TG and PWID to their partners. Community-based HTC with different  
 294 approaches (mobile testing and door-to-door testing etc.) that found effective in increasing  
 295 uptake of HTC and linking them to HIV care among MSM/TG and PWID in other

1  
2  
3 296 settings[33] need to be evaluated in the context of Nepal. Otherwise, the 90-90-90 targets  
4  
5 297 prioritised to improve health and prevention of secondary HIV transmission would not be  
6  
7 298 possible in Nepal. This study also found different risk factors for non-utilization of HTC in  
8  
9 299 last one year among FSW and MSM/TG.They were demographic: late adolescents  
10  
11 300 (MSM/TG); behavioural: injectable drug abuse (FSW) and no condom use at last sex  
12  
13 301 (MSM/TG); structural: participation in HIV awareness programmes (FSW and MSM/TG),  
14  
15 302 forced sex in last one year (risk factor among FSW and protective factor among MSM/TG),  
16  
17 303 absence of dependent members (FSW), physical assault in last year (MSM/TG); and  
18  
19 304 psychosocial: being distressed/depressed (FSW).  
20  
21

22  
23 305 Psychosocial factors play an important role in health services utilisation [16]. FSW  
24  
25 306 who had distress or depression (four out of every 10) had a higher prevalence of non-  
26  
27 307 utilization of HTC. This could have resulted in disempowerment and thereby resulting in not  
28  
29 308 accessing HTC services when needed[13,14].Studies have found that FSW used alcohol and  
30  
31 309 drugs, to reduce stress and to help them cope with their work[17,34].Gambian study showed  
32  
33 310 that women who experienced forced sex reported severe depression[35].A study conducted  
34  
35 311 among FSW working outside of the capital city (Kathmandu) found a very high prevalence of  
36  
37 312 depression, and the experience of any form violence (verbal, physical and sexual) was also  
38  
39 313 common among them and also associated with depression[36].Currently, there are no targeted  
40  
41 314 programs that address the mental health problems of FSW in Nepal and lack of laws that  
42  
43 315 protect the rights of sex workers also exacerbating the experience of violence among them.  
44  
45 316 Efforts addressing the experience of violence and its consequences (depression) among FSW  
46  
47 317 are essential in Nepal otherwise it would be difficult to increase uptake of HTC among them.  
48  
49

50  
51 318 According to the IBBS survey report of 2012, old MSM/TG were found to use  
52  
53 319 condoms more when compared to younger ones. Similarly, the median age of first sexual  
54  
55 320 intercourse being 16 years and the fact that the old adolescents (16-19 years) MSM/TG did not  
56  
57  
58  
59  
60

1  
2  
3 321 significantly access HTC is a cause of concern[10,13]. The risk-taking behaviour in  
4  
5 322 adolescents can compound their risk in acquiring HIV, and hence this group need to be  
6  
7 323 targeted. In Nepal, the blanket approach to implementing interventions (HTC) without  
8  
9 324 considering the specific needs of adolescents or young people belonging to key populations  
10  
11 325 might have effects in low uptake of HTC among them. Evidence from China suggests that the  
12  
13 326 use of peer-led community-based rapid HIV test increase the uptake of HIV testing among  
14  
15 327 young MSM[37].

16  
17  
18 328 Not visiting an HTC facility was also associated with not using a condom during last  
19  
20 329 sex among MSM/TG. FSW who were injecting drugs were also less likely to uptake HTC in  
21  
22 330 the last 12 months. Our study findings are consistent with the study conducted among FSW in  
23  
24 331 Vietnam where unprotected sex and injecting drug use associated with less likely to have  
25  
26 332 voluntary HIV test [38]. The findings suggest that we are missing to reach those FSW who  
27  
28 333 were at increased risk for HIV due to their risky dual behaviours such as unprotected sex or  
29  
30 334 injecting drug abuse.

31  
32  
33  
34 335 Some factors affecting utilisation of HTC by MSM/TG were different from that of  
35  
36 336 FSW. In events like forced sex in last year among FSW, it reduced the utilisation of HTCs  
37  
38 337 among FSW. Among MSM/TG, the experience of forced sex led to the utilisation of HTC.  
39  
40 338 The difference might be due to the fact that MSM/TG are highly networked population than  
41  
42 339 the FSW[39]such as most of them are directly and indirectly associated with their community  
43  
44 340 organisations (Blue Diamond Society) which work for the rights of gender and sexuality  
45  
46 341 minorities in Nepal. That may have resulted to seek available services among MSM/TG after  
47  
48 342 experiencing the sexual abuse.

49  
50  
51 343 Participation in HIV awareness programmes by key population showed decreasing  
52  
53 344 trend over the years [10,13]. Participation as a risk factor for non-utilisation of HTC for both  
54  
55 345 FSW and MSM/TG seemed intriguing. The activities which enlisted more participation were  
56  
57  
58  
59  
60



1  
2  
3 346 short duration events like condom/AIDS day celebration compared to effective training  
4  
5 347 methods like demonstration classes, workshops,etc.(web-only table 2). These aforementioned  
6  
7 348 short-term awareness activities might not affect knowledge level of FSW and MSM/TG about  
8  
9 349 the importance of HTC. The other explanation for this could be the cross-sectional nature of  
10  
11 350 data. Those who had visited an HTC in last one year might not have felt the need for attending  
12  
13 351 HIV awareness programmes.

14  
15  
16  
17 352 Despite being limited by a cross-sectional design, the findings of this study bring out  
18  
19 353 three significant policy implications. First, the intervention to address the burden of  
20  
21 354 depression needs to be an integral part of programmes for FSW and MSM/TG at all levels.  
22  
23 355 Second, HTC should be developed as an empowerment centre or training to improve their  
24  
25 356 skills that help FSW and MSM/TG to tackle physical and sexual abuse. Third, specific  
26  
27 357 prevention programmes should be rolled out to reach adolescent FSW and MSM/TG, and  
28  
29 358 FSW who were practising dual risk behaviours such as inconsistent condom use or injecting  
30  
31 359 drug use. The HTC centre should also consider the specific needs of adolescent FSW or  
32  
33 360 MSM/TG.

34  
35  
36  
37 361 Our study adhered to STROBE guidelines for conduct and report of the study [40].  
38  
39 362 The findings are generalizable to FSW, and MSM/TG of Nepal as standard sampling strategy  
40  
41 363 was followed for the IBBS survey [10,13–15]. The present study had inherent limitations of  
42  
43 364 analysing secondary data. Certain pertinent variables (for example; injectable drug abuse in  
44  
45 365 last 12 months among MSM/TG) could not be included in the analysis due to missing data.  
46  
47 366 The limitations of the original survey like social desirability bias, recall bias due to the  
48  
49 367 assessment of past exposures might have influenced the self-reported variables. The cross-  
50  
51 368 sectional design itself could result in difficulties in ascertaining temporality between various  
52  
53 369 factors studied and non-utilization of HTC.  
54  
55  
56  
57  
58  
59  
60

1  
2  
3 370 **CONCLUSION**  
4  
5

6 371 To conclude, the psychosocial and structural factors are influencing the utilisation of  
7  
8 372 HIV testing and counselling centres among FSW and MSM/TG in Nepal. In addition to  
9  
10 373 focussing on these risk factors, there is a need to improve HTC to lend psychosocial support  
11  
12 374 or to address the need of specific adolescent FSW and MSM/TG or FSW who also inject  
13  
14 375 drugs. Creative behaviour change and communication strategies or interventions to improve  
15  
16 376 skills to tackle physical and sexual abuse should be ensured to overcome the limitations of  
17  
18 377 current programmes for key populations in Nepal.  
19  
20

21  
22 378

23  
24 379 **Acknowledgements**  
25

26 380 This research was conducted through the Structured Operational Research and Training  
27  
28 381 Initiative (SORT IT), a global partnership led by the Special Programme for Research and  
29  
30 382 Training in Tropical Diseases at the World Health Organization (WHO/TDR). The training  
31  
32 383 programme, funded by the Department for International Development (DFID), UK, did not  
33  
34 384 fund the research per say. The funders of the training programme had no role in study design,  
35  
36 385 data collection and analysis, decision to publish, or preparation of the manuscript. The model  
37  
38 386 is based on a course developed jointly by the International Union Against Tuberculosis and  
39  
40 387 Lung Disease (The Union) and Médecinssans Frontières (MSF/Doctors Without Borders).  
41  
42 388 The specific SORT IT programme which resulted in this publication was jointly developed  
43  
44 389 and implemented by: The Union South-East Asia Office, New Delhi, India; the Centre for  
45  
46 390 Operational Research, The Union, Paris, France; The Union, Mandalay, Myanmar; the  
47  
48 391 Operational Research Unit (LUXOR), MSF Brussels Operational Center, Luxembourg;  
49  
50 392 Department of Preventive and Social Medicine, Jawaharlal Institute of Postgraduate Medical  
51  
52 393 Education and Research, Puducherry, India; Department of Community Medicine,  
53  
54 394 Government T.D Medical College, Alappuzha, India; College of Life and Environmental  
55  
56  
57  
58  
59  
60

1  
2  
3 395 Sciences, Exeter University, UK; Velammal Medical College Hospital & Research Institute,  
4  
5 396 Madurai, India; and Institute of Medicine, University of Chester, UK.  
6

7 397

8  
9 398 **Funding:** All the IBBS survey-related activities were funded by The Global Fund to Fight  
10  
11 399 AIDS, Tuberculosis and Malaria (GFATM). This research received no specific grant from any  
12  
13 400 funding agency in the public, commercial or not-for-profit sectors.  
14  
15

16 401

17  
18 402 **Competing interest:** None  
19

20 403

21  
22 404 **Contributors:** RS, SP, HDS and KD were involved in conception and design of the study; all  
23  
24 405 authors were involved in analysis and interpretation of data; RS prepared the first draft, and  
25  
26 406 all authors were involved in critically reviewing the draft and approving the final draft for  
27  
28 407 submission.  
29

30  
31 408 **Data availability statement:** Data is available to the corresponding author and will be  
32  
33 409 provided on request.  
34

35  
36 410 **Provenance and peer review:** Not commissioned; externally peer reviewed.  
37

38 411

39  
40 412 REFERENCES  
41

42  
43 413 1 World Health Organization(WHO). HIV factsheet. 2015.  
44

45  
46 414 2 UNAIDS. 90-90-90 An ambitious treatment target to help end the AIDS epidemic.  
47  
48 415 Switzerland: 2014.  
49

50  
51 416 3 World Health Organization. Global update on HIV treatment 2013: Results, impact and  
52  
53 417 opportunities. 2013.  
54

55  
56 418 4 NCASC. Review of the National HIV Surveillance System: Strengthening the HIV  
57  
58

- 1  
2  
3 419 Second Generation Surveillance in Nepal. Kathmandu: 2007.  
4  
5  
6 420 5 NCASC. National Consolidated Guidelines for Treating and Preventing HIV in Nepal.  
7  
8 421 2014.  
9  
10  
11 422 6 Gardner EM, McLees MP, Steiner JF, *et al.* The spectrum of engagement in HIV care  
12  
13 423 and its relevance to test-and-treat strategies for prevention of HIV infection. *Clin Infect*  
14  
15 424 *Dis* 2011;**52**:793–800. doi:10.1093/cid/ciq243  
16  
17  
18 425 7 Koirala S, Deuba K, Nampaisan O, *et al.* Facilitators and barriers for retention in HIV  
19  
20 426 care between testing and treatment in Asia—A study in Bangladesh, Indonesia, Lao,  
21  
22 427 Nepal, Pakistan, Philippines and Vietnam. 2017;:1–20.  
23  
24 428 doi:10.1371/journal.pone.0176914  
25  
26  
27  
28 429 8 NCASC. Factsheet : HIV Epidemic Update of Nepal, as of December 2015.  
29  
30  
31 430 9 NCASC. Integrated Biological and Behavioral Surveillance ( IBBS ) Survey among  
32  
33 431 Female Sex Workers in 22 Terai Highway Districts of Nepal Round V. 2016.  
34  
35  
36 432 10 NCASC. Integrated Biological and Behavioral Surveillance (IBBS) Survey among  
37  
38 433 Men who have sex with men (MSM) and Transgender (TG) people in Kathmandu  
39  
40 434 Valley, Nepal. Kathmandu: 2012.  
41  
42  
43  
44 435 11 World Health Organization. Preventing HIV/AIDS in young people: A systematic  
45  
46 436 review of the evidence from developing countries. 2006.  
47  
48  
49 437 12 Lightfoot M. HIV prevention for adolescents: where do we go from here? *Am Psychol*  
50  
51 438 2012;**67**:661–71. doi:10.1037/a0029831  
52  
53  
54 439 13 NCASC. Integrated Biological and Behavioral Surveillance Survey (IBBS) among  
55  
56 440 Male Injecting Drug Users (IDUs) in Western to Far Western Terai of Nepal.  
57  
58  
59  
60

- 1  
2  
3 441 Kathmandu: 2012.  
4  
5  
6 442 14 NCASC. Integrated Biological and Behavioral Surveillance (IBBS) Survey among  
7  
8 443 Female Sex Workers in 22 Terai Highway Districts of Nepal. Kathmandu: 2012.  
9  
10  
11 444 15 Deuba K, Anderson S, Ekstrom AM, *et al.* Micro-level social and structural factors act  
12  
13 445 synergistically to increase HIV risk among Nepalese female sex workers. *Int J Infect*  
14  
15 446 *Dis* 2016;**49**:100–6. doi:10.1016/j.ijid.2016.06.007  
16  
17  
18 447 16 Deuba K, Ekström AM, Shrestha R, *et al.* Psychosocial Health Problems Associated  
19  
20 448 with Increased HIV Risk Behavior among Men Who Have Sex with Men in Nepal: A  
21  
22 449 Cross-Sectional Survey. *PLoS One* 2013;**8**. doi:10.1371/journal.pone.0058099  
23  
24  
25  
26 450 17 Stall R, Mills TC, Williamson J, *et al.* Association of Co-Occurring Psychosocial  
27  
28 451 Health Problems and Increased Vulnerability to HIV/AIDS among Urban Men Who  
29  
30 452 Have Sex with Men. *Am J Public Health* 2003;**93**:939–42. doi:10.2105/AJPH.93.6.939  
31  
32  
33 453 18 Strathdee SA, West BS, Reed E, *et al.* Substance Use and HIV Among Female Sex  
34  
35 454 Workers and Female Prisoners: Risk Environments and Implications for Prevention,  
36  
37 455 Treatment, and Policies. 2015;**69**:1–15.  
38  
39 456 doi:10.1097/QAI.0000000000000624.Substance  
40  
41  
42  
43 457 19 Patel SK, Saggurti N, Pachauri S, *et al.* Correlates of Mental Depression Among  
44  
45 458 Female Sex Workers in Southern India. *Asia-Pacific J public Heal* Published Online  
46  
47 459 First: 2015. doi:10.1177/1010539515601480  
48  
49  
50  
51 460 20 OECD. DAC list of ODA Recipients 2014. 2014. doi: Accessed on 4march 2016  
52  
53  
54 461 21 UNAIDS. Combination HIV Prevention: tailoring and coordinating biomedical,  
55  
56 462 behavioural and structural strategies to reduce new HIV infections. 2010.  
57  
58  
59  
60

- 1  
2  
3 463 22 Natamba BK, Achan J, Arbach A, *et al.* Reliability and validity of the center for  
4  
5 464 epidemiologic studies-depression scale in screening for depression among HIV-  
6  
7 465 infected and -uninfected pregnant women attending antenatal services in northern  
8  
9 466 Uganda: a cross-sectional study. *BMC Psychiatry* 2014;**14**:303. doi:10.1186/s12888-  
10  
11 467 014-0303-y
- 14 468 23 Radloff LS. The CES-D Scale: a self-report depression scale for research in the general  
15  
16 469 population. *Appl Psychol Meas* 1977;**1**:385–401. doi:10.1177/014662167700100306  
17  
18  
19  
20 470 24 Vyavaharkar M, Moneyham L, Corwin S, *et al.* Relationships between stigma, social  
21  
22 471 support, and depression in HIV-infected African American women living in the rural  
23  
24 472 Southeastern United States. *NIH-PA* 2011;**21**.  
25  
26 473 doi:10.1016/j.jana.2009.07.008.Relationships  
27  
28  
29  
30 474 25 Yi MS, Mrus JM, Wade TJ, *et al.* Religion, spirituality, and depressive symptoms in  
31  
32 475 patients with HIV/AIDS. *J Gen Intern Med* 2006;**21**:21–7. doi:10.1111/j.1525-  
33  
34 476 1497.2006.00643.x  
35  
36  
37 477 26 Williamson T, Eliasziw M, Fick G. Log-binomial models: exploring failed  
38  
39 478 convergence. *Emerg Themes Epidemiol* 2013;**10**:14. doi:10.1186/1742-7622-10-14  
40  
41  
42 479 27 Barros AJ, Hirakata VN. Alternatives for logistic regression in cross-sectional studies:  
43  
44 480 an empirical comparison of models that directly estimate the prevalence ratio. *BMC*  
45  
46 481 *Med Res Methodol* 2003;**3**:21. doi:10.1186/1471-2288-3-21  
47  
48  
49  
50 482 28 Jha UM, Raj Y, Venkatesh S, *et al.* HIV epidemic among men who have sex with men  
51  
52 483 in India: National scenario of an unfinished agenda. *HIV/AIDS - Res Palliat Care*  
53  
54 484 2014;**6**:159–70. doi:10.2147/HIV.S69708  
55  
56  
57 485 29 Li R, Pan X, Ma Q, *et al.* Prevalence of prior HIV testing and associated factors among  
58  
59  
60

- 1  
2  
3 486 MSM in Zhejiang Province, China: a cross-sectional study. *BMC Public Health*  
4  
5 487 2016;**16**:1152. doi:10.1186/s12889-016-3806-2  
6  
7  
8 488 30 Dandona R, Dandona L, Kumar G, *et al.* HIV testing among female sex workers in  
9  
10 489 Andhra Pradesh, India. *Aids* 2005;2031–41.  
11  
12  
13 490 31 Vutthikraivit P, Lertnimitr B, Chalardsakul P, *et al.* Prevalence of HIV testing and  
14  
15 491 associated factors among young men who have sex with men (MSM) in Bangkok,  
16  
17 492 Thailand. *J Med Assoc Thai* 2014;**97 Suppl 2**: S207–14.  
18  
19  
20  
21 493 32 Ganju D, Ramesh S, Saggurti N. Factors associated with HIV testing among male  
22  
23 494 injecting drug users: findings from a cross-sectional behavioural and biological survey  
24  
25 495 in Manipur and Nagaland, India. *Harm Reduct J* 2016;**13**:21. doi:10.1186/s12954-016-  
26  
27 496 0110-5  
28  
29  
30 497 33 Suthar AB, Ford N, Bachanas PJ, *et al.* Towards Universal Voluntary HIV Testing and  
31  
32 498 Counselling: A Systematic Review and Meta-Analysis of Community-Based  
33  
34 499 Approaches. *PLoS Med* 2013;**10**. doi:10.1371/journal.pmed.1001496  
35  
36  
37  
38 500 34 Saito T, Sadoshima J. High prevalence of forced sex among non-brothel based, wine  
39  
40 501 shop centered sex workers in Chennai, India. 2016;**116**:1477–90.  
41  
42 502 doi:10.1161/CIRCRESAHA.116.303790.The  
43  
44  
45 503 35 Sherwood JA, Grosso A, Decker MR, *et al.* Sexual violence against female sex workers  
46  
47 504 in The Gambia: a cross-sectional examination of the associations between victimization  
48  
49 505 and reproductive, sexual and mental health. *BMC Public Health* 2015;**15**:270.  
50  
51 506 doi:10.1186/s12889-015-1583-y  
52  
53  
54  
55 507 36 Sagtani RA, Bhattarai S, Adhikari BR, *et al.* Violence, HIV risk behaviour and  
56  
57 508 depression among female sex workers of eastern Nepal. *BMJ Open* 2013;**3**:e002763.  
58  
59  
60

- 1  
2  
3 509 doi:10.1136/bmjopen-2013-002763  
4  
5  
6 510 37 Yan H, Zhang R, Wei C, *et al.* A peer-led , community-based rapid HIV testing  
7  
8 511 intervention among untested men who have sex with men in China : an operational  
9  
10 512 model for expansion of HIV testing and linkage to care. *Sex Transm Infect* 2014;:388–  
11  
12 513 93. doi:10.1136/sextrans-2013-051397  
13  
14  
15 514 38 Tran BX, Nguyen LT, Nguyen NP, *et al.* HIV voluntary testing and perceived risk  
16  
17 515 among female sex workers in the mekong delta region of vietnam. *Glob Health Action*  
18  
19 516 2013;6:1–7. doi:10.3402/gha.v6i0.20690  
20  
21  
22  
23 517 39 Deuba K, Ojha B, Shrestha R, *et al.* Optimizing the implementation of integrated  
24  
25 518 biological and behavioural surveillance surveys of HIV in resource limited settings-  
26  
27 519 lessons from Nepal. *Asian Pacific J Trop Dis* 2014;4:S605–15. doi:10.1016/S2222-  
28  
29 520 1808(14)60688-5  
30  
31  
32  
33 521 40 von Elm E, Altman DG, Egger M, *et al.* The Strengthening the Reporting of  
34  
35 522 Observational Studies in Epidemiology (STROBE) Statement: Guidelines for reporting  
36  
37 523 observational studies. *Lancet* 2007;370:1453–7. doi:10.1016/j.ijisu.2014.07.013  
38  
39

40 **Licence statement**

41  
42  
43 525 The Corresponding Author has the right to grant on behalf of all authors and does grant on  
44  
45 526 behalf of all authors, an exclusive licence (or non-exclusive for government employees) on a  
46  
47 527 worldwide basis to the BMJ and co-owners or contracting owning societies (where published  
48  
49 528 by the BMJ on their behalf), and its Licensees to permit this article (if accepted) to be  
50  
51 529 published in Sexually Transmitted Infections and any other BMJ products and to exploit all  
52  
53 530 subsidiary rights, as set out in our licence.  
54  
55  
56  
57  
58  
59  
60



1  
2  
3 532 **Figure Legend**  
4  
5

6 533 **Figure 1.**Study districts included in Integrated Biological and Behavioural Surveillance  
7

8 534 (IBBS) survey 2012, Nepal.  
9

10  
11 535 Figure footnote  
12

13  
14 536 *\*MSM/TG – Men who have sex with men/transgender, PWID – people who inject drugs (we*  
15

16 537 *did not analyse PWID data), FSW – female sex workers; KTM valley- Kathmandu Valley*  
17  
18

19 538 **Web-only figure 1.**Convergence plot for the outcome of interest.  
20  
21  
22  
23  
24  
25  
26  
27  
28  
29  
30  
31  
32  
33  
34  
35  
36  
37  
38  
39  
40  
41  
42  
43  
44  
45  
46  
47  
48  
49  
50  
51  
52  
53  
54  
55  
56  
57  
58  
59  
60



Figure 1. Study districts included in Integrated Biological and Behavioural Surveillance (IBBS) survey 2012, Nepal. Figure footnote \*MSM/TG – Men who have sex with men/transgender, PWID – people who inject drugs, FSW – female sex workers

1  
2  
3  
4  
5  
6  
7  
8  
9  
10  
11  
12  
13  
14  
15  
16  
17  
18  
19  
20  
21  
22  
23  
24  
25  
26  
27  
28  
29  
30  
31  
32  
33  
34  
35  
36  
37  
38  
39  
40  
41  
42  
43  
44  
45  
46  
47  
48  
49  
50  
51  
52  
53  
54  
55  
56  
57  
58  
59  
60



view only

**Web-only table 1.** The prevalence of demographic, psychosocial and structural factors among MSM/TG, IBBS 2012 Nepal.

| <b>Factors</b>                                | <b>MSM/TG*<br/>Frequency<br/>(%)</b> | <b>MSM/TG<br/>RDS Adjusted<br/>(CI)</b> |
|-----------------------------------------------|--------------------------------------|-----------------------------------------|
| <b>Total</b>                                  | 400 (100)                            |                                         |
| HIV prevalence                                |                                      | 3.3 (1.9-5.9)                           |
| HTC not utilized                              | 221(55)                              | 68.6 (54.3-80.1)                        |
| <b>Demographic</b>                            |                                      |                                         |
| Age in years                                  |                                      |                                         |
| 16-19                                         | 69 (17)                              | 17.7(11.5-26.1)                         |
| 20-24                                         | 129 (32)                             | 31.3(22.5-41.8)                         |
| ≥25                                           | 202 (51)                             | 51.0(39.2-62.5)                         |
| Illiterate                                    | 13(3)                                | 3.1(1.2-7.9)                            |
| Married                                       | 111(28)                              | 23.3(16.2-32.2)                         |
| <b>Behavioural</b>                            |                                      |                                         |
| Condom use in last sex                        | 339(85)                              | 75.8(64.8-84.2)                         |
| Drinking Alcohol                              | 323(81)                              | 81.0(71.3-88.1)                         |
| <b>Structural</b>                             |                                      |                                         |
| Ever Participated in HIV awareness programs   | 185(46)                              | 35.6(23.9-49.2)                         |
| Physical assault in last year                 | 57(14)                               | 6.3(3.6-10.8)                           |
| Housing instability                           |                                      |                                         |
| Own Home                                      | 75(19)                               | 19.9(12.4-30.3)                         |
| Forced sex in last year                       | 52(13)                               | 5.5(3.3-9.1)                            |
| Discrimination in Job                         | 79(20)                               | 5.9(3.9-8.8)                            |
| <b>Psychosocial</b>                           |                                      |                                         |
| Stigma                                        | 253(63)                              | 63.2(52.0-73.2)                         |
| Suicidal thought                              | 107(27)                              | 14.2(9.8-20.1)                          |
| Depression                                    |                                      |                                         |
| Distressed                                    | 83(21)                               | 14.9(10.3-21.1)                         |
| Depressed                                     | 97(24)                               | 18.2(11.9-26.7)                         |
| SSQS^                                         |                                      |                                         |
| Satisfied                                     | 390(97)                              | 98.5(96.1-99.4)                         |
| Dissatisfied                                  | 10(3)                                | 1.5(0.5-3.8)                            |
| <b>Number of seed</b>                         | 8                                    |                                         |
| <b>Maximum no. of recruitment wave (mean)</b> | 8 (3.67)                             |                                         |

1  
2  
3  
4  
5  
6  
7  
8  
9  
10  
11  
12  
13  
14  
15  
16  
17  
18  
19  
20  
21  
22  
23  
24  
25  
26  
27  
28  
29  
30  
31  
32  
33  
34  
35  
36  
37  
38  
39  
40  
41  
42  
43  
44  
45  
46  
47  
48  
49  
50  
51  
52  
53  
54  
55  
56  
57  
58  
59  
60

---

\*MSM/TG – Men who have sex with men/transgender, HIV- Human Immunodeficiency Virus., AIDS- Acquired immune deficiency syndrome, HTC-HIV Testing and Counselling, ^SSQS- The Social Support Questionnaire Score.

For peer review only

**Web-only table 2.** The prevalence of demographic, psychosocial and structural factors among FSW, IBBS 2012 Nepal.

| Factors                               | FSW<br>N (%) |
|---------------------------------------|--------------|
| <b>Total</b>                          | 610 (100)    |
| HIV prevalence                        | 6 (1)        |
| <b>Demographic</b>                    |              |
| Age in years                          |              |
| 16-19                                 | 85 (14)      |
| 20-24                                 | 130 (21)     |
| ≥25                                   | 395(65)      |
| Illiterate                            | 196(32)      |
| Married                               | 360(59)      |
| <b>Behavioural</b>                    |              |
| Use of condom with most recent client | 461(75)      |
| Consistent condom use                 | 236(59)      |
| <b>Structural</b>                     |              |
| Having dependents in family           | 341(56)      |
| Own home                              | 311(51)      |
| Forced sex in last one year           | 125(21)      |
| Knowledge regarding confidential HTC  | 397(65)      |
| Participated in discussion in HIV     | 84(29)       |
| Participated in HIV awareness program | 169(28)      |
| Participated in AIDS day              | 238(39)      |
| Participated in Condom Day            | 207(34)      |
| Participated in Workshop for HIV      | 110(18)      |
| Received demonstration on Condon Use  | 61(10)       |
| Comprehensive Knowledge on condom     | 122(20)      |
| <b>Psychosocial</b>                   |              |
| Stigma                                | 295(48)      |
| Suicidal thought                      | 210(34)      |
| Distressed / Depressed                | 268 (44)     |
| SSQS <sup>^</sup>                     |              |
| Satisfied                             | 530(87)      |
| Dissatisfied                          | 80(3)        |

\*MSM/TG – Men who have sex with men/transgender, FSW – female sex workers, HIV- Human Immunodeficiency Virus., AIDS- Acquired immune deficiency syndrome, HTC-HIV Testing and Counselling, ^SSQS- The Social Support Questionnaire Score.

**Web-only table 3.** Factors associated with non-utilization of HIV Testing and Counselling (HTC) centres among Men having Sex with Men/Transgender using RDS weights

| Variables                                   |              |            | HTC not Utilised <sup>@</sup> | Adj PR <sup>**</sup> |
|---------------------------------------------|--------------|------------|-------------------------------|----------------------|
|                                             |              | N          | n(%) <sup>‡</sup>             |                      |
| <b>Total</b>                                |              | <b>400</b> | <b>221(55)</b>                |                      |
| <b>Demographic factors</b>                  |              |            |                               |                      |
| Age in years                                | 16-19        | 69         | 54(78)                        | 1.3(1.0-1.7)*        |
|                                             | 20-24        | 129        | 73(57)                        | 1.1(0.8-1.4)         |
|                                             | >25          | 202        | 94(47)                        | Ref                  |
| Educational Status                          | Illiterate   | 13         | 7(54)                         | -                    |
|                                             | Literate     | 387        | 214(55)                       | -                    |
| Marital Status                              | Unmarried    | 289        | 163(56)                       | -                    |
|                                             | Married      | 111        | 58(52)                        | -                    |
| <b>Behavioural</b>                          |              |            |                               |                      |
| Condom use at last sex                      | Yes          | 339        | 177(72)                       | Ref.                 |
|                                             | No           | 61         | 44(52)                        | 1.2(1.1-1.4)*        |
| Drinking Alcohol                            | Yes          | 323        | 186(58)                       | 1.1(0.9-1.3)         |
|                                             | No           | 77         | 35(45)                        | Ref.                 |
| <b>Structural</b>                           |              |            |                               |                      |
| Ever Participated in HIV awareness programs | Yes          | 185        | 62(34)                        | 2.2(1.3-3.7)*        |
|                                             | No           | 215        | 159(74)                       | Ref.                 |
| Physical assault in last year               | Yes          | 57         | 10(18)                        | 1.2(.8-1.7)          |
|                                             | No           | 343        | 211(62)                       | Ref.                 |
| Housing instability                         | Homeless     | 8          | 4(50)                         | -                    |
|                                             | Own home     | 75         | 42(56)                        | -                    |
|                                             | Rented       | 317        | 175(55)                       | -                    |
| Forced sex in last year                     | Yes          | 52         | 10(19)                        | 0.5(0.2-1.1)***      |
|                                             | No           | 348        | 211(61)                       | Ref.                 |
| Discrimination in Job                       | Yes          | 79         | 17(22)                        | Ref.                 |
|                                             | No           | 321        | 204(64)                       | 0.9(0.6-1.5)         |
| <b>Psychosocial factors</b>                 |              |            |                               |                      |
| Stigma towards HIV                          | Yes          | 253        | 138(54)                       | -                    |
|                                             | No           | 147        | 83(56)                        | -                    |
| Suicidal thought Ever                       | Yes          | 107        | 33(31)                        | 0.8(0.6-1.3)         |
|                                             | No           | 293        | 188(64)                       | Ref.                 |
| Depression <sup>#</sup>                     | Euthymic     | 220        | 121(59)                       | -                    |
|                                             | Distressed   | 83         | 49(53)                        | -                    |
|                                             | Depressed    | 97         | 51(55)                        | -                    |
| SSQS <sup>^</sup>                           | Satisfied    | 390        | 216(55)                       | -                    |
|                                             | Dissatisfied | 10         | 5(50)                         | -                    |

‡Unweighted descriptive statistics. For RDS-weighted estimates refer to web-only table 2; @Not utilised in last one year; \* p<0.05; \*\*\*p=0.07 \*\*Adjusted prevalence ratio using Poisson regression with robust variance estimates (enter method); factors with Unadjusted PR with p<0.2 included in model and collinearity checked; #Depression measured using a CES-D scale; ^SSQS- The Social Support Questionnaire Score.

1  
2  
3 Web-only box 1. Independent variables used in this study from the IBBS 2012 survey among  
4 FSW and MSM/TG to determine Uptake of HTC, Nepal.  
5  
6  
7

8 **Demographic Factors:** Age, Educational Status, Marital Status, Having dependent  
9

10 **Behavioural Factors:** Condom Use last sex, Ever inject drug, Drinking alcohol  
11  
12

13 **Psychosocial Factors:**

- 14 ✓ Among FSW: Stigma towards HIV, Suicidal thoughts Ever, Depression, The Social  
15 Support Questionnaire Score (SSQS)  
16
- 17 ✓ Among MSM/TG: Stigma towards HIV, Suicidal thoughts Ever, Depression, The  
18 Social Support Questionnaire Score (SSQS)  
19  
20  
21  
22  
23

24 **Structural Factors:**

- 25 ✓ Among FSW: Housing Instability, Experienced forced sex in last year, Ever  
26 participated in HIV programs, Police detention in last 6 months, Physical assault last  
27 year, Client refusal to pay after sex in last year  
28
- 29 ✓ Among MSM/TG: Housing Instability, Ever participated in HIV programs, Physical  
30 assault last year, Experienced forced sex in last year, Discrimination in Job  
31  
32  
33  
34  
35  
36  
37  
38  
39  
40  
41  
42  
43  
44  
45  
46  
47  
48  
49  
50  
51  
52  
53  
54  
55  
56  
57  
58  
59  
60



## STROBE Statement—checklist of items that should be included in reports of observational studies

|                      | Item No | Recommendation                                                                                                                                                                                                                                                                                                                                                                                                                                                         | Current paper                                                                                                                             |
|----------------------|---------|------------------------------------------------------------------------------------------------------------------------------------------------------------------------------------------------------------------------------------------------------------------------------------------------------------------------------------------------------------------------------------------------------------------------------------------------------------------------|-------------------------------------------------------------------------------------------------------------------------------------------|
| Title and abstract   | 1       | (a) Indicate the study's design with a commonly used term in the title or the abstract                                                                                                                                                                                                                                                                                                                                                                                 | Done. In abstract. Line 26                                                                                                                |
|                      |         | (b) Provide in the abstract an informative and balanced summary of what was done and what was found                                                                                                                                                                                                                                                                                                                                                                    | Done. Line 23-44                                                                                                                          |
| <b>Introduction</b>  |         |                                                                                                                                                                                                                                                                                                                                                                                                                                                                        |                                                                                                                                           |
| Background/rationale | 2       | Explain the scientific background and rationale for the investigation being reported                                                                                                                                                                                                                                                                                                                                                                                   | Done. Line 64-94                                                                                                                          |
| Objectives           | 3       | State specific objectives, including any pre-specified hypotheses                                                                                                                                                                                                                                                                                                                                                                                                      | Done. Line 95-97. There was no pre-specified hypothesis. We wanted to explore the risk factors for non-utilization of HIV testing centre. |
| <b>Methods</b>       |         |                                                                                                                                                                                                                                                                                                                                                                                                                                                                        |                                                                                                                                           |
| Study design         | 4       | Present key elements of study design early in the paper                                                                                                                                                                                                                                                                                                                                                                                                                | Done. Line 109-111                                                                                                                        |
| Setting              | 5       | Describe the setting, locations, and relevant dates, including periods of recruitment, exposure, follow-up, and data collection                                                                                                                                                                                                                                                                                                                                        | Done. Line 112-138                                                                                                                        |
| Participants         | 6       | (a) <i>Cohort study</i> —Give the eligibility criteria, and the sources and methods of selection of participants. Describe methods of follow-up<br><i>Case-control study</i> —Give the eligibility criteria, and the sources and methods of case ascertainment and control selection. Give the rationale for the choice of cases and controls<br><i>Cross-sectional study</i> —Give the eligibility criteria, and the sources and methods of selection of participants | Done. Line 139-158 (cross-sectional analytic study)                                                                                       |
|                      |         | (b) <i>Cohort study</i> —For matched studies, give matching criteria and number of exposed and unexposed<br><i>Case-control study</i> —For matched studies, give matching criteria and the number of controls per case                                                                                                                                                                                                                                                 |                                                                                                                                           |
| Variables            | 7       | Clearly define all outcomes, exposures, predictors, potential confounders, and effect modifiers. Give diagnostic criteria, if applicable                                                                                                                                                                                                                                                                                                                               | Done. Line 157-172                                                                                                                        |

|                              |    |                                                                                                                                                                                                                                                                                                           |                                                                              |
|------------------------------|----|-----------------------------------------------------------------------------------------------------------------------------------------------------------------------------------------------------------------------------------------------------------------------------------------------------------|------------------------------------------------------------------------------|
| Data sources/<br>measurement | 8* | For each variable of interest, give sources of data and details of methods of assessment (measurement). Describe comparability of assessment methods if there is more than one group                                                                                                                      | Done. Line 110-111 and 157-171.<br>Comparability described in lines 183-190. |
| Bias                         | 9  | Describe any efforts to address potential sources of bias                                                                                                                                                                                                                                                 | Lines 183-190                                                                |
| Study size                   | 10 | Explain how the study size was arrived at                                                                                                                                                                                                                                                                 | Line 139-156                                                                 |
| Quantitative variables       | 11 | Explain how quantitative variables were handled in the analyses. If applicable, describe which groupings were chosen and why                                                                                                                                                                              | Lines 173-190                                                                |
| Statistical methods          | 12 | (a) Describe all statistical methods, including those used to control for confounding                                                                                                                                                                                                                     | Done. Line 173-190.                                                          |
|                              |    | (b) Describe any methods used to examine subgroups and interactions                                                                                                                                                                                                                                       | Lines 183-190.                                                               |
|                              |    | (c) Explain how missing data were addressed                                                                                                                                                                                                                                                               | Not applicable.                                                              |
|                              |    | (d) <i>Cohort study</i> —If applicable, explain how loss to follow-up was addressed<br><i>Case-control study</i> —If applicable, explain how matching of cases and controls was addressed<br><i>Cross-sectional study</i> —If applicable, describe analytical methods taking account of sampling strategy | Lines 178-182                                                                |
|                              |    | (e) Describe any sensitivity analyses                                                                                                                                                                                                                                                                     | Not applicable.                                                              |

Continued on next page

1  
2  
3  
4  
5  
6  
7  
8  
9  
10  
11  
12  
13  
14  
15  
16  
17  
18  
19  
20  
21  
22  
23  
24  
25  
26  
27  
28  
29  
30  
31  
32  
33  
34  
35  
36  
37  
38  
39  
40  
41  
42  
43  
44  
45  
46  
47  
48  
49  
50  
51  
52  
53  
54  
55  
56  
57  
58  
59  
60

| <b>Results</b>    |     |                                                                                                                                                                                                              |                    |
|-------------------|-----|--------------------------------------------------------------------------------------------------------------------------------------------------------------------------------------------------------------|--------------------|
| Participants      | 13* | (a) Report numbers of individuals at each stage of study—eg numbers potentially eligible, examined for eligibility, confirmed eligible, included in the study, completing follow-up, and analysed            | Line 203-204       |
|                   |     | (b) Give reasons for non-participation at each stage                                                                                                                                                         | Not applicable     |
|                   |     | (c) Consider use of a flow diagram                                                                                                                                                                           | Not applicable     |
| Descriptive data  | 14* | (a) Give characteristics of study participants (eg demographic, clinical, social) and information on exposures and potential confounders                                                                     | Done. Line 204-207 |
|                   |     | (b) Indicate number of participants with missing data for each variable of interest                                                                                                                          | No missing data    |
|                   |     | (c) <i>Cohort study</i> —Summarise follow-up time (eg, average and total amount)                                                                                                                             | Not applicable     |
| Outcome data      | 15* | <i>Cohort study</i> —Report numbers of outcome events or summary measures over time                                                                                                                          |                    |
|                   |     | <i>Case-control study</i> —Report numbers in each exposure category, or summary measures of exposure                                                                                                         |                    |
|                   |     | <i>Cross-sectional study</i> —Report numbers of outcome events or summary measures                                                                                                                           | Done. 205-206      |
| Main results      | 16  | (a) Give unadjusted estimates and, if applicable, confounder-adjusted estimates and their precision (eg, 95% confidence interval). Make clear which confounders were adjusted for and why they were included | Lines 209-214      |
|                   |     | (b) Report category boundaries when continuous variables were categorized                                                                                                                                    | Lines 162-166      |
|                   |     | (c) If relevant, consider translating estimates of relative risk into absolute risk for a meaningful time period                                                                                             | Not applicable     |
| Other analyses    | 17  | Report other analyses done—eg analyses of subgroups and interactions, and sensitivity analyses                                                                                                               | Not applicable     |
| <b>Discussion</b> |     |                                                                                                                                                                                                              |                    |
| Key results       | 18  | Summarise key results with reference to study objectives                                                                                                                                                     | Done. Line 239-248 |
| Limitations       | 19  | Discuss limitations of the study, taking into account sources of potential bias or imprecision. Discuss both direction and magnitude of any potential bias                                                   | Done. Line 300-306 |
| Interpretation    | 20  | Give a cautious overall interpretation of                                                                                                                                                                    | Done. Line 309-312 |

1  
2 results considering objectives, limitations,  
3 multiplicity of analyses, results from similar  
4 studies, and other relevant evidence

---

5 Generalisability 21 Discuss the generalisability (external Done. Line 299-300  
6 validity) of the study results

---

7  
8 **Other information**

---

9 Funding 22 Give the source of funding and the role of the Done. Line 315-333  
10 funders for the present study and, if  
11 applicable, for the original study on which  
12 the present article is based  
13  
14

15  
16 \*Give information separately for cases and controls in case-control studies and, if applicable, for exposed and  
17 unexposed groups in cohort and cross-sectional studies.  
18

19 **Note:** An Explanation and Elaboration article discusses each checklist item and gives methodological background and  
20 published examples of transparent reporting. The STROBE checklist is best used in conjunction with this article (freely  
21 available on the Web sites of PLoS Medicine at <http://www.plosmedicine.org/>, Annals of Internal Medicine at  
22 <http://www.annals.org/>, and Epidemiology at <http://www.epidem.com/>). Information on the STROBE Initiative is  
23 available at [www.strobe-statement.org](http://www.strobe-statement.org).  
24  
25  
26  
27  
28  
29  
30  
31  
32  
33  
34  
35  
36  
37  
38  
39  
40  
41  
42  
43  
44  
45  
46  
47  
48  
49  
50  
51  
52  
53  
54  
55  
56  
57  
58  
59  
60
