# Supplementary material for: Why don’t key populations access HIV testing and counselling centres in Nepal? Findings based on national surveillance survey
Source: PubMed Central journal article supplement — BMJ Open. 2017 Dec 28;7(12):e017408. doi: 10.1136/bmjopen-2017-017408 (PMC5770839; doi:10.1136/bmjopen-2017-017408), 2017-12-28
Supplement: bmjopen-2017-017408supp001.pdf [file bmjopen-2017-017408supp001.pdf]

**Web-only table 1.** The prevalence of demographic, psychosocial and structural factors among MSM/TG, IBBS 2012 Nepal.

| <b>Factors</b>                                | <b>MSM/TG*<br/>Frequency<br/>(%)</b> | <b>MSM/TG<br/>RDS Adjusted<br/>(CI)</b> |
|-----------------------------------------------|--------------------------------------|-----------------------------------------|
| <b>Total</b>                                  | 400 (100)                            |                                         |
| HIV prevalence                                |                                      | 3.3 (1.9-5.9)                           |
| HTC not utilized                              | 221(55)                              | 68.6 (54.3-80.1)                        |
| <b>Demographic</b>                            |                                      |                                         |
| Age in years                                  |                                      |                                         |
| 16-19                                         | 69 (17)                              | 17.7(11.5-26.1)                         |
| 20-24                                         | 129 (32)                             | 31.3(22.5-41.8)                         |
| ≥25                                           | 202 (51)                             | 51.0(39.2-62.5)                         |
| Illiterate                                    | 13(3)                                | 3.1(1.2-7.9)                            |
| Married                                       | 111(28)                              | 23.3(16.2-32.2)                         |
| <b>Behavioural</b>                            |                                      |                                         |
| Condom use in last sex                        | 339(85)                              | 75.8(64.8-84.2)                         |
| Drinking Alcohol                              | 323(81)                              | 81.0(71.3-88.1)                         |
| <b>Structural</b>                             |                                      |                                         |
| Ever Participated in HIV awareness programs   | 185(46)                              | 35.6(23.9-49.2)                         |
| Physical assault in last year                 | 57(14)                               | 6.3(3.6-10.8)                           |
| Housing instability                           |                                      |                                         |
| Own Home                                      | 75(19)                               | 19.9(12.4-30.3)                         |
| Forced sex in last year                       | 52(13)                               | 5.5(3.3-9.1)                            |
| Discrimination in Job                         | 79(20)                               | 5.9(3.9-8.8)                            |
| <b>Psychosocial</b>                           |                                      |                                         |
| Stigma                                        | 253(63)                              | 63.2(52.0-73.2)                         |
| Suicidal thought                              | 107(27)                              | 14.2(9.8-20.1)                          |
| Depression                                    |                                      |                                         |
| Distressed                                    | 83(21)                               | 14.9(10.3-21.1)                         |
| Depressed                                     | 97(24)                               | 18.2(11.9-26.7)                         |
| SSQS^                                         |                                      |                                         |
| Satisfied                                     | 390(97)                              | 98.5(96.1-99.4)                         |
| Dissatisfied                                  | 10(3)                                | 1.5(0.5-3.8)                            |
| <b>Number of seed</b>                         | 8                                    |                                         |
| <b>Maximum no. of recruitment wave (mean)</b> | 8 (3.67)                             |                                         |

---

\*MSM/TG – Men who have sex with men/transgender, HIV- Human Immunodeficiency Virus., AIDS- Acquired immune deficiency syndrome, HTC-HIV Testing and Counselling, ^SSQS- The Social Support Questionnaire Score.
