# Supplementary material for: Why don’t key populations access HIV testing and counselling centres in Nepal? Findings based on national surveillance survey
Source: PubMed Central journal article supplement — BMJ Open. 2017 Dec 28;7(12):e017408. doi: 10.1136/bmjopen-2017-017408 (PMC5770839; doi:10.1136/bmjopen-2017-017408), 2017-12-28
Supplement: bmjopen-2017-017408supp002.pdf [file bmjopen-2017-017408supp002.pdf]

**Web-only table 2.** The prevalence of demographic, psychosocial and structural factors among FSW, IBBS 2012 Nepal.

| Factors                               | FSW<br>N (%) |
|---------------------------------------|--------------|
| <b>Total</b>                          | 610 (100)    |
| HIV prevalence                        | 6 (1)        |
| <b>Demographic</b>                    |              |
| Age in years                          |              |
| 16-19                                 | 85 (14)      |
| 20-24                                 | 130 (21)     |
| ≥25                                   | 395(65)      |
| Illiterate                            | 196(32)      |
| Married                               | 360(59)      |
| <b>Behavioural</b>                    |              |
| Use of condom with most recent client | 461(75)      |
| Consistent condom use                 | 236(59)      |
| <b>Structural</b>                     |              |
| Having dependents in family           | 341(56)      |
| Own home                              | 311(51)      |
| Forced sex in last one year           | 125(21)      |
| Knowledge regarding confidential HTC  | 397(65)      |
| Participated in discussion in HIV     | 84(29)       |
| Participated in HIV awareness program | 169(28)      |
| Participated in AIDS day              | 238(39)      |
| Participated in Condom Day            | 207(34)      |
| Participated in Workshop for HIV      | 110(18)      |
| Received demonstration on Condon Use  | 61(10)       |
| Comprehensive Knowledge on condom     | 122(20)      |
| <b>Psychosocial</b>                   |              |
| Stigma                                | 295(48)      |
| Suicidal thought                      | 210(34)      |
| Distressed / Depressed                | 268 (44)     |
| SSQS^                                 |              |
| Satisfied                             | 530(87)      |
| Dissatisfied                          | 80(3)        |

\*MSM/TG – Men who have sex with men/transgender, FSW – female sex workers, HIV- Human Immunodeficiency Virus., AIDS- Acquired immune deficiency syndrome, HTC-HIV Testing and Counselling, ^SSQS- The Social Support Questionnaire Score.
