# Supplementary material for: Why don’t key populations access HIV testing and counselling centres in Nepal? Findings based on national surveillance survey
Source: PubMed Central journal article supplement — BMJ Open. 2017 Dec 28;7(12):e017408. doi: 10.1136/bmjopen-2017-017408 (PMC5770839; doi:10.1136/bmjopen-2017-017408), 2017-12-28
Supplement: bmjopen-2017-017408supp003.pdf [file bmjopen-2017-017408supp003.pdf]

Web-only box 1. Independent variables used in this study from the IBBS 2012 survey among FSW and MSM/TG to determine Uptake of HTC, Nepal.

**Demographic Factors:** Age, Educational Status, Marital Status, Having dependent

**Behavioural Factors:** Condom Use last sex, Ever inject drug, Drinking alcohol

**Psychosocial Factors:**

- ✓ Among FSW: Stigma towards HIV, Suicidal thoughts Ever, Depression, The Social Support Questionnaire Score (SSQS)
- ✓ Among MSM/TG: Stigma towards HIV, Suicidal thoughts Ever, Depression, The Social Support Questionnaire Score (SSQS)

**Structural Factors:**

- ✓ Among FSW: Housing Instability, Experienced forced sex in last year, Ever participated in HIV programs, Police detention in last 6 months, Physical assault last year, Client refusal to pay after sex in last year
- ✓ Among MSM/TG: Housing Instability, Ever participated in HIV programs, Physical assault last year, Experienced forced sex in last year, Discrimination in Job
