# Supplementary material for: Why don’t key populations access HIV testing and counselling centres in Nepal? Findings based on national surveillance survey
Source: PubMed Central journal article supplement — BMJ Open. 2017 Dec 28;7(12):e017408. doi: 10.1136/bmjopen-2017-017408 (PMC5770839; doi:10.1136/bmjopen-2017-017408), 2017-12-28
Supplement: bmjopen-2017-017408supp005.pdf [file bmjopen-2017-017408supp005.pdf]

**Web-only table 3.** Factors associated with non-utilization of HIV Testing and Counselling (HTC) centres among Men having Sex with Men/Transgender using RDS weights

| Variables                                   |              |            | HTC not Utilised <sup>@</sup> | Adj PR <sup>**</sup> |
|---------------------------------------------|--------------|------------|-------------------------------|----------------------|
|                                             |              | N          | n(%) <sup>‡</sup>             |                      |
| <b>Total</b>                                |              | <b>400</b> | <b>221(55)</b>                |                      |
| <b>Demographic factors</b>                  |              |            |                               |                      |
| Age in years                                | 16-19        | 69         | 54(78)                        | 1.3(1.0-1.7)*        |
|                                             | 20-24        | 129        | 73(57)                        | 1.1(0.8-1.4)         |
|                                             | >25          | 202        | 94(47)                        | Ref                  |
| Educational Status                          | Illiterate   | 13         | 7(54)                         | -                    |
|                                             | Literate     | 387        | 214(55)                       | -                    |
| Marital Status                              | Unmarried    | 289        | 163(56)                       | -                    |
|                                             | Married      | 111        | 58(52)                        | -                    |
| <b>Behavioural</b>                          |              |            |                               |                      |
| Condom use at last sex                      | Yes          | 339        | 177(72)                       | Ref.                 |
|                                             | No           | 61         | 44(52)                        | 1.2(1.1-1.4)*        |
| Drinking Alcohol                            | Yes          | 323        | 186(58)                       | 1.1(0.9-1.3)         |
|                                             | No           | 77         | 35(45)                        | Ref.                 |
| <b>Structural</b>                           |              |            |                               |                      |
| Ever Participated in HIV awareness programs | Yes          | 185        | 62(34)                        | 2.2(1.3-3.7)*        |
|                                             | No           | 215        | 159(74)                       | Ref.                 |
| Physical assault in last year               | Yes          | 57         | 10(18)                        | 1.2(.8-1.7)          |
|                                             | No           | 343        | 211(62)                       | Ref.                 |
| Housing instability                         | Homeless     | 8          | 4(50)                         | -                    |
|                                             | Own home     | 75         | 42(56)                        | -                    |
|                                             | Rented       | 317        | 175(55)                       | -                    |
| Forced sex in last year                     | Yes          | 52         | 10(19)                        | 0.5(0.2-1.1)***      |
|                                             | No           | 348        | 211(61)                       | Ref.                 |
| Discrimination in Job                       | Yes          | 79         | 17(22)                        | Ref.                 |
|                                             | No           | 321        | 204(64)                       | 0.9(0.6-1.5)         |
| <b>Psychosocial factors</b>                 |              |            |                               |                      |
| Stigma towards HIV                          | Yes          | 253        | 138(54)                       | -                    |
|                                             | No           | 147        | 83(56)                        | -                    |
| Suicidal thought Ever                       | Yes          | 107        | 33(31)                        | 0.8(0.6-1.3)         |
|                                             | No           | 293        | 188(64)                       | Ref.                 |
| Depression <sup>#</sup>                     | Euthymic     | 220        | 121(59)                       | -                    |
|                                             | Distressed   | 83         | 49(53)                        | -                    |
|                                             | Depressed    | 97         | 51(55)                        | -                    |
| SSQS <sup>^</sup>                           | Satisfied    | 390        | 216(55)                       | -                    |
|                                             | Dissatisfied | 10         | 5(50)                         | -                    |

‡Unweighted descriptive statistics. For RDS-weighted estimates refer to web-only table 2; @Not utilised in last one year; \* p<0.05; \*\*\*p=0.07 \*\*Adjusted prevalence ratio using Poisson regression with robust variance estimates (enter method); factors with Unadjusted PR with p<0.2 included in model and collinearity checked; #Depression measured using a CES-D scale; ^SSQS- The Social Support Questionnaire Score.
